# Supplementary material for: [1,5]-Hydride Shift-Cyclization versus C(sp2)-H Functionalization in the Knoevenagel-Cyclization Domino Reactions of 1,4- and 1,5-Benzoxazepines
Source: Molecules. 2020 Mar 11;25(6):1265. doi: 10.3390/molecules25061265 (PMC7144003; doi:10.3390/molecules25061265)
Supplement: Supplementary file 1 [file molecules-25-01265-s001.pdf]

# Supporting information

## [1,5]-Hydride shift-cyclization *versus* C(sp<sup>2</sup>)-H Functionalization in the Knoevenagel-Cyclization Domino Reactions of 1,4- and 1,5-Benzoxazepines

Dóra Szalóki Vargáné <sup>1,2,†</sup>, László Tóth <sup>1,3,†</sup>, Balázs Buglyó <sup>1</sup>, Attila Kiss-Sziksai <sup>1</sup>, Attila Mándi <sup>1</sup>, Péter Mátyus <sup>4</sup>, Sándor Antus <sup>1,\*</sup>, Yinghan Chen <sup>5</sup>, Dehai Li <sup>5</sup>, Lingxue Tao <sup>6</sup>, Haiyan Zhang <sup>6</sup> and Tibor Kurtán <sup>1,\*</sup>

<sup>1</sup> Department of Organic Chemistry, University of Debrecen, Debrecen, P. O. Box 400, Debrecen 4002, Hungary; szalokido@gmail.com (D.S.V.); tothlaszlochemist@gmail.com (L.T.); buglyo.balazs@science.unideb.hu (B.B.); kiss.attila@science.unideb.hu (A.K.-S.); mandi.attila@science.unideb.hu (A.M.)

<sup>2</sup> Doctoral School of Chemistry, University of Debrecen, Egyetem tér 1, Debrecen 4032, Hungary

<sup>3</sup> Department of Organic Chemistry, Semmelweis University, Budapest 1094, Hungary

<sup>4</sup> Institute of Digital Health Sciences, Faculty of Health and Public Services, Semmelweis University, Ferenc tér 15, Budapest 1094, Hungary; peter.maty@gmail.com

<sup>5</sup> Key Laboratory of Marine Drugs, Chinese Ministry of Education, School of Medicine and Pharmacy, Ocean University of China, Qingdao 266003, China; qd\_yinghan@163.com (Y.C.); dehaili@ouc.edu.cn (D.L.);

<sup>6</sup> CAS Key Laboratory of Receptor Research, Shanghai Institute of Materia Medica, Chinese Academy of Sciences, 555 Zu Chong Zhi Road, Zhang Jiang Hi-Tech Park, Shanghai 201203, China; lingxuetao@sim.ac.cn (L.T.); hzhang@sim.ac.cn (H.Z.)

\* Correspondences: kurtan.tibor@science.unideb.hu (T.K.), antus.sandor@science.unideb.hu (S.A.)

† These authors contributed equally to this work.

### Table of content

|                                                                                                                                     |    |
|-------------------------------------------------------------------------------------------------------------------------------------|----|
| <b>Figure S1.</b> <sup>1</sup> H-NMR spectrum of <i>rac</i> - <b>8a</b> measured in CDCl <sub>3</sub> (400 MHz).....                | 5  |
| <b>Figure S2.</b> J-modulated <sup>13</sup> C-NMR spectrum of <i>rac</i> - <b>8a</b> measured in CDCl <sub>3</sub> (100 MHz).....   | 6  |
| <b>Figure S3.</b> IR spectrum of <i>rac</i> - <b>8a</b> recorded as KBr disc.....                                                   | 7  |
| <b>Figure S4.</b> <sup>1</sup> H-NMR spectrum of <i>rac</i> - <b>9a</b> measured in CDCl <sub>3</sub> (400 MHz).....                | 8  |
| <b>Figure S5.</b> J-modulated <sup>13</sup> C-NMR spectrum of <i>rac</i> - <b>9a</b> measured in CDCl <sub>3</sub> (100 MHz).....   | 9  |
| <b>Figure S6.</b> IR spectrum of <i>rac</i> - <b>9a</b> recorded as KBr disc.....                                                   | 10 |
| <b>Figure S7.</b> <sup>1</sup> H-NMR spectrum of <i>rac</i> - <b>1a</b> measured in CDCl <sub>3</sub> (400 MHz).....                | 11 |
| <b>Figure S8.</b> J-modulated <sup>13</sup> C-NMR spectrum of <i>rac</i> - <b>1a</b> measured in CDCl <sub>3</sub> (100 MHz).....   | 12 |
| <b>Figure S9.</b> IR spectrum of <i>rac</i> - <b>1a</b> recorded as KBr disc.....                                                   | 13 |
| <b>Figure S10.</b> <sup>1</sup> H-NMR spectrum of <i>rac</i> - <b>12a</b> measured in CDCl <sub>3</sub> (400 MHz).....              | 14 |
| <b>Figure S11.</b> J-modulated <sup>13</sup> C-NMR spectrum of <i>rac</i> - <b>12a</b> measured in CDCl <sub>3</sub> (100 MHz)..... | 15 |
| <b>Figure S12.</b> IR spectrum of <i>rac</i> - <b>12a</b> recorded as KBr disc.....                                                 | 16 |

|                                                                                                                                      |    |
|--------------------------------------------------------------------------------------------------------------------------------------|----|
| <b>Figure S13.</b> $^1\text{H}$ -NMR spectrum of <i>rac</i> - <b>10a</b> measured in $\text{CDCl}_3$ (400 MHz).....                  | 17 |
| <b>Figure S14.</b> J-modulated $^{13}\text{C}$ -NMR spectrum of <i>rac</i> - <b>10a</b> measured in $\text{CDCl}_3$ (100 MHz).....   | 18 |
| <b>Figure S15.</b> IR spectrum of <i>rac</i> - <b>10a</b> recorded as KBr disc.....                                                  | 19 |
| <b>Figure S16.</b> $^1\text{H}$ -NMR spectrum of <i>rac</i> - <b>11a</b> measured in $\text{DMSO-d}_6$ (400 MHz).....                | 20 |
| <b>Figure S17.</b> J-modulated $^{13}\text{C}$ -NMR spectrum of <i>rac</i> - <b>11a</b> measured in $\text{DMSO-d}_6$ (100 MHz)..... | 21 |
| <b>Figure S18.</b> IR spectrum of <i>rac</i> - <b>11a</b> recorded as KBr disc.....                                                  | 22 |
| <b>Figure S19.</b> $^1\text{H}$ -NMR spectrum of <i>rac</i> - <b>7b</b> measured in $\text{CDCl}_3$ (360 MHz).....                   | 23 |
| <b>Figure S20.</b> J-modulated $^{13}\text{C}$ -NMR spectrum of <i>rac</i> - <b>7b</b> measured in $\text{CDCl}_3$ (90 MHz).....     | 24 |
| <b>Figure S21.</b> J-modulated $^{13}\text{C}$ -NMR spectrum of <i>rac</i> - <b>7b</b> measured in $\text{CDCl}_3$ (90 MHz).....     | 25 |
| <b>Figure S22.</b> $^1\text{H}$ -NMR spectrum of <i>rac</i> - <b>7c</b> measured in $\text{CDCl}_3$ (360 MHz).....                   | 26 |
| <b>Figure S23.</b> J-modulated $^{13}\text{C}$ -NMR spectrum of <i>rac</i> - <b>7c</b> measured in $\text{CDCl}_3$ 90 MHz).....      | 27 |
| <b>Figure S24.</b> J-modulated $^{13}\text{C}$ -NMR spectrum of <i>rac</i> - <b>7c</b> measured in $\text{CDCl}_3$ (90 MHz).....     | 28 |
| <b>Figure S25.</b> $^1\text{H}$ -NMR spectrum of <i>rac</i> - <b>8b</b> measured in $\text{CDCl}_3$ (400 MHz).....                   | 29 |
| <b>Figure S26.</b> J-modulated $^{13}\text{C}$ -NMR spectrum of <i>rac</i> - <b>8b</b> measured in $\text{CDCl}_3$ (100 MHz).....    | 30 |
| <b>Figure S27.</b> J-modulated $^{13}\text{C}$ -NMR spectrum of <i>rac</i> - <b>8b</b> measured in $\text{CDCl}_3$ (100 MHz).....    | 31 |
| <b>Figure S28.</b> IR spectrum of <i>rac</i> - <b>8b</b> recorded as KBr disc.....                                                   | 32 |
| <b>Figure S29.</b> $^1\text{H}$ -NMR spectrum of <i>rac</i> - <b>8c</b> measured in $\text{CDCl}_3$ (400 MHz).....                   | 33 |
| <b>Figure S30.</b> J-modulated $^{13}\text{C}$ -NMR spectrum of <i>rac</i> - <b>8c</b> measured in $\text{CDCl}_3$ (100 MHz).....    | 34 |
| <b>Figure S31.</b> J-modulated $^{13}\text{C}$ -NMR spectrum of <i>rac</i> - <b>8c</b> measured in $\text{CDCl}_3$ (100 MHz).....    | 35 |
| <b>Figure S32.</b> IR spectrum of <i>rac</i> - <b>8c</b> recorded as KBr disc.....                                                   | 36 |
| <b>Figure S33.</b> $^1\text{H}$ -NMR spectrum of <i>rac</i> - <b>9b</b> measured in $\text{CDCl}_3$ (400 MHz).....                   | 37 |
| <b>Figure S34.</b> J-modulated $^{13}\text{C}$ -NMR spectrum of <i>rac</i> - <b>9b</b> measured in $\text{CDCl}_3$ (100 MHz).....    | 38 |
| <b>Figure S35.</b> J-modulated $^{13}\text{C}$ -NMR spectrum of <i>rac</i> - <b>9b</b> measured in $\text{CDCl}_3$ (100 MHz).....    | 39 |
| <b>Figure S36.</b> IR spectrum of <i>rac</i> - <b>9b</b> recorded as KBr disc.....                                                   | 40 |
| <b>Figure S37.</b> $^1\text{H}$ -NMR spectrum of <i>rac</i> - <b>9c</b> measured in $\text{CDCl}_3$ (400 MHz).....                   | 41 |
| <b>Figure S38.</b> J-modulated $^{13}\text{C}$ -NMR spectrum of <i>rac</i> - <b>9c</b> measured in $\text{CDCl}_3$ (100 MHz).....    | 42 |

|                                                                                                                                     |    |
|-------------------------------------------------------------------------------------------------------------------------------------|----|
| <b>Figure S39.</b> J-modulated $^{13}\text{C}$ -NMR spectrum of <i>rac</i> - <b>9c</b> measured in $\text{CDCl}_3$ (100 MHz).....   | 43 |
| <b>Figure S40.</b> IR spectrum of <i>rac</i> - <b>9c</b> recorded as KBr disc.....                                                  | 44 |
| <b>Figure S41.</b> $^1\text{H}$ -NMR spectrum of <i>rac</i> - <b>1b</b> measured in $\text{CDCl}_3$ (400 MHz).....                  | 45 |
| <b>Figure S42.</b> J-modulated $^{13}\text{C}$ -NMR spectrum of <i>rac</i> - <b>1b</b> measured in $\text{CDCl}_3$ (100 MHz).....   | 46 |
| <b>Figure S43.</b> J-modulated $^{13}\text{C}$ -NMR spectrum of <i>rac</i> - <b>1b</b> measured in $\text{CDCl}_3$ (100 MHz).....   | 47 |
| <b>Figure S44.</b> IR spectrum of <i>rac</i> - <b>1b</b> recorded as KBr disc.....                                                  | 48 |
| <b>Figure S45.</b> $^1\text{H}$ -NMR spectrum of <i>rac</i> - <b>1c</b> measured in $\text{CDCl}_3$ (400 MHz).....                  | 49 |
| <b>Figure S46.</b> J-modulated $^{13}\text{C}$ -NMR spectrum of <i>rac</i> - <b>1c</b> measured in $\text{CDCl}_3$ (100 MHz).....   | 50 |
| <b>Figure S47.</b> J-modulated $^{13}\text{C}$ -NMR spectrum of <i>rac</i> - <b>1c</b> measured in $\text{CDCl}_3$ (100 MHz).....   | 51 |
| <b>Figure S48.</b> J-modulated $^{13}\text{C}$ -NMR spectrum of <i>rac</i> - <b>1c</b> measured in $\text{CDCl}_3$ (100 MHz).....   | 52 |
| <b>Figure S49.</b> IR spectrum of <i>rac</i> - <b>1c</b> recorded as KBr disc.....                                                  | 53 |
| <b>Figure S50.</b> $^1\text{H}$ -NMR spectrum of <i>rac</i> - <b>10b</b> measured in $\text{DMF-d}_7$ (400 MHz).....                | 54 |
| <b>Figure S51.</b> J-modulated $^{13}\text{C}$ -NMR spectrum of <i>rac</i> - <b>10b</b> measured in $\text{DMF-d}_7$ (100 MHz)..... | 55 |
| <b>Figure S52.</b> J-modulated $^{13}\text{C}$ -NMR spectrum of <i>rac</i> - <b>10b</b> measured in $\text{DMF-d}_7$ (100 MHz)..... | 56 |
| <b>Figure S53.</b> $^1\text{H}$ -NMR spectrum of <i>rac</i> - <b>11b</b> measured in $\text{CDCl}_3$ (400 MHz).....                 | 57 |
| <b>Figure S54.</b> J-modulated $^{13}\text{C}$ -NMR spectrum of <i>rac</i> - <b>11b</b> measured in $\text{CDCl}_3$ (100 MHz).....  | 58 |
| <b>Figure S55.</b> J-modulated $^{13}\text{C}$ -NMR spectrum of <i>rac</i> - <b>11b</b> measured in $\text{CDCl}_3$ (100 MHz).....  | 59 |
| <b>Figure S56.</b> IR spectrum of <i>rac</i> - <b>11b</b> recorded as KBr disc.....                                                 | 60 |
| <b>Figure S57.</b> $^1\text{H}$ -NMR spectrum of <i>rac</i> - <b>11c</b> measured in $\text{CDCl}_3$ (400 MHz).....                 | 61 |
| <b>Figure S58.</b> J-modulated $^{13}\text{C}$ -NMR spectrum of <i>rac</i> - <b>11c</b> measured in $\text{CDCl}_3$ (100 MHz).....  | 62 |
| <b>Figure S59.</b> J-modulated $^{13}\text{C}$ -NMR spectrum of <i>rac</i> - <b>11c</b> measured in $\text{CDCl}_3$ (100 MHz).....  | 63 |
| <b>Figure S60.</b> IR spectrum of <i>rac</i> - <b>11c</b> recorded as KBr disc.....                                                 | 64 |
| <b>Figure S61.</b> $^1\text{H}$ -NMR spectrum of <b>13</b> measured in $\text{CDCl}_3$ (360 MHz).....                               | 65 |
| <b>Figure S62.</b> J-modulated $^{13}\text{C}$ -NMR spectrum of <b>13</b> measured in $\text{CDCl}_3$ (90 MHz).....                 | 66 |
| <b>Figure S63.</b> IR spectrum of <b>13</b> recorded as KBr disc.....                                                               | 67 |
| <b>Figure S64.</b> $^1\text{H}$ -NMR spectrum of <b>15</b> measured in $\text{CDCl}_3$ (400 MHz).....                               | 68 |
| <b>Figure S65.</b> J-modulated $^{13}\text{C}$ -NMR spectrum of <b>15</b> measured in $\text{CDCl}_3$ (100 MHz).....                | 69 |

|                                                                                                                                                                                                                                                       |    |
|-------------------------------------------------------------------------------------------------------------------------------------------------------------------------------------------------------------------------------------------------------|----|
| <b>Figure S66.</b> IR spectrum of <b>15</b> recorded as KBr disc.....                                                                                                                                                                                 | 70 |
| <b>Figure S67.</b> <sup>1</sup> H-NMR spectrum of <b>4</b> measured in CDCl <sub>3</sub> (400 MHz).....                                                                                                                                               | 71 |
| <b>Figure S68.</b> J-modulated <sup>13</sup> C-NMR spectrum of <b>4</b> measured in CDCl <sub>3</sub> (100 MHz).....                                                                                                                                  | 72 |
| <b>Figure S69.</b> IR spectrum of <b>4</b> recorded as KBr disc.....                                                                                                                                                                                  | 73 |
| <b>Figure S70.</b> <sup>1</sup> H-NMR spectrum of <b>29</b> measured in CDCl <sub>3</sub> (360 MHz).....                                                                                                                                              | 74 |
| <b>Figure S71.</b> J-modulated <sup>13</sup> C-NMR spectrum of <b>20</b> measured in CDCl <sub>3</sub> (90 MHz).....                                                                                                                                  | 75 |
| <b>Figure S72.</b> IR spectrum of <b>20</b> recorded as KBr disc.....                                                                                                                                                                                 | 76 |
| <b>Figure S73.</b> <sup>1</sup> H-NMR spectrum of <b>6</b> measured in CDCl <sub>3</sub> (400 MHz).....                                                                                                                                               | 77 |
| <b>Figure S74.</b> J-modulated <sup>13</sup> C-NMR spectrum of <b>6</b> measured in CDCl <sub>3</sub> (100 MHz).....                                                                                                                                  | 78 |
| <b>Table S1.</b> Organocatalytic transformations of <b>1a</b> to <i>trans</i> - <b>10a</b> (columns A) and <b>1a</b> to <b>11a</b> (columns B); reaction condition: MgSO <sub>4</sub> /CHCl <sub>3</sub> , 0.3 equivalent of organocatalyst, rt. .... | 79 |
| <b>Figure S78.</b> Concentration-dependent curve of <b>6</b> for the inhibition of AChE activity.....                                                                                                                                                 | 80 |

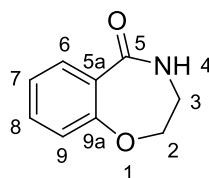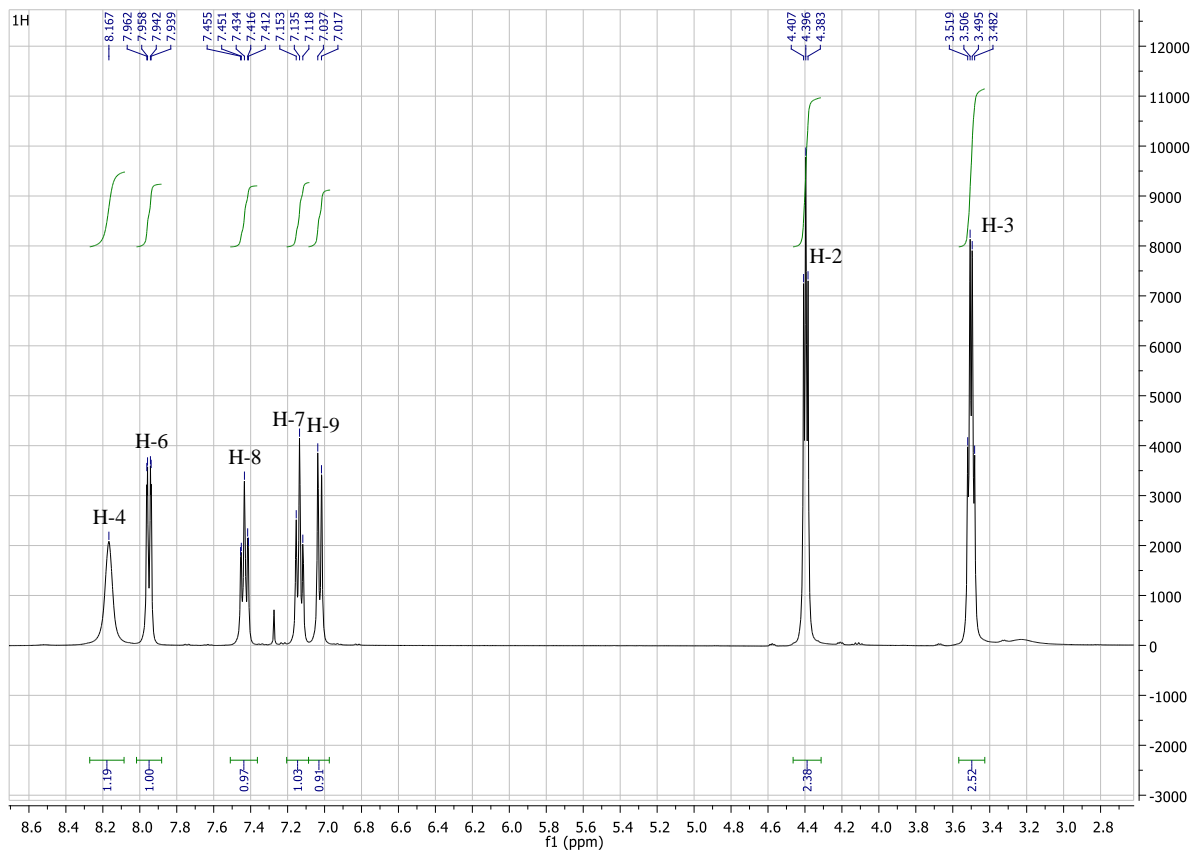

**Figure S1.**  $^1\text{H}$ -NMR spectrum of *rac*-**8a** measured in  $\text{CDCl}_3$  (400 MHz).

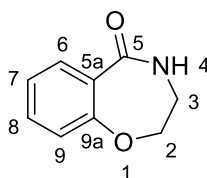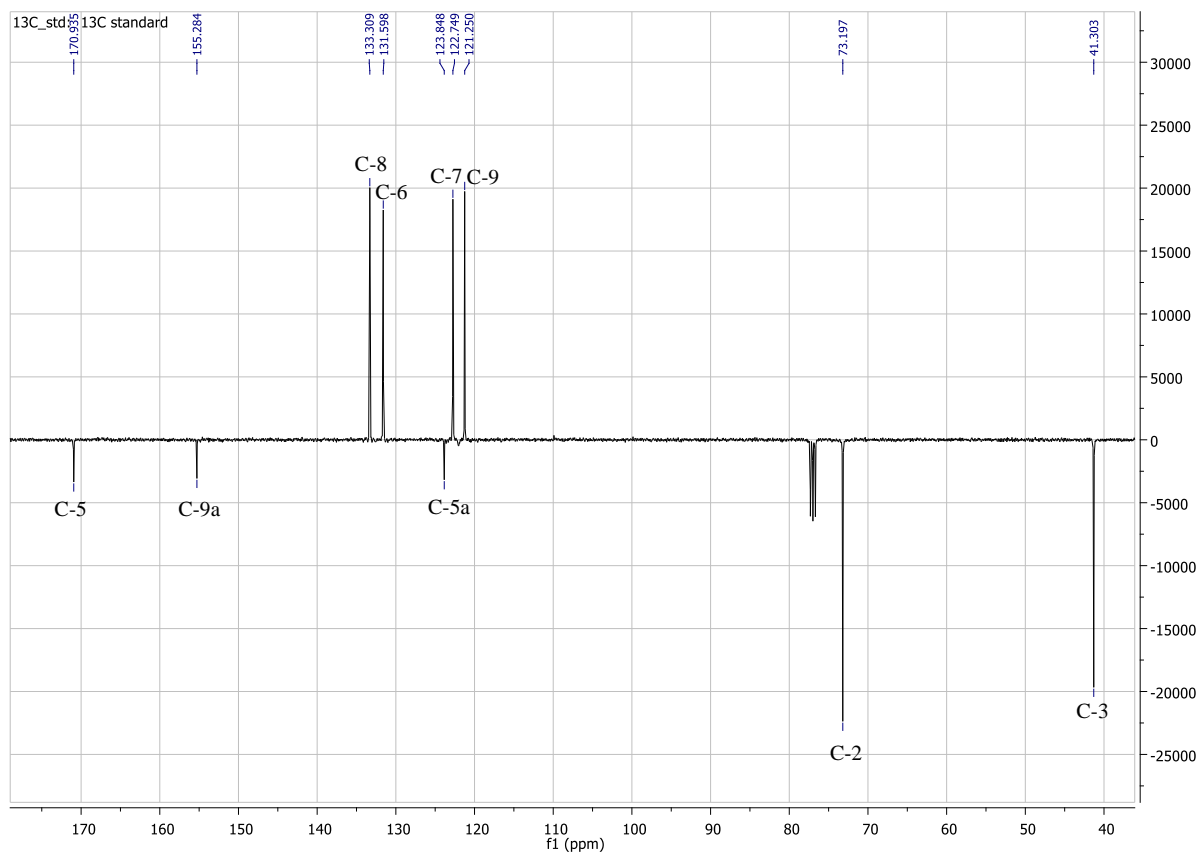

**Figure S2.** J-modulated  $^{13}\text{C}$ -NMR spectrum of *rac*-**8a** measured in  $\text{CDCl}_3$  (100 MHz).

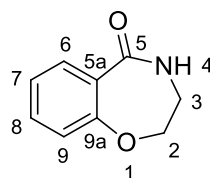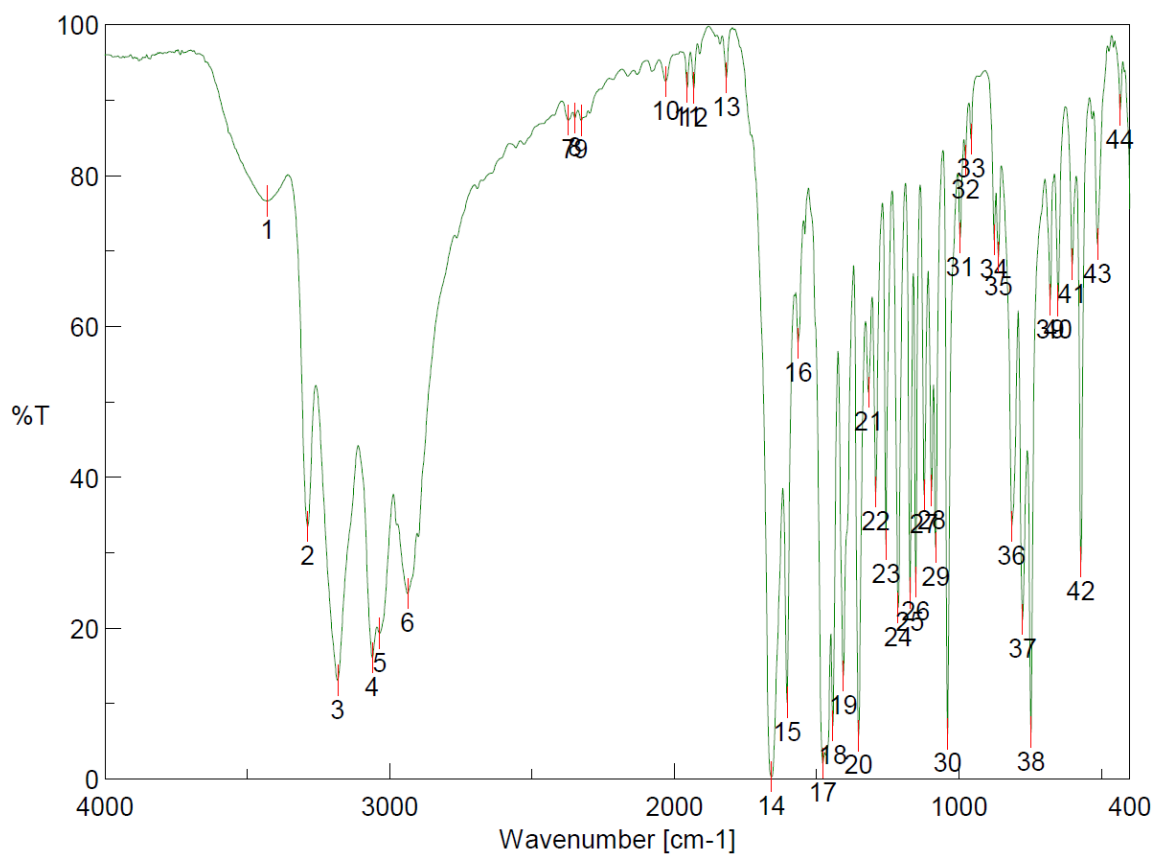

**Figure S3.** IR spectrum of *rac*-8a recorded as KBr disc.

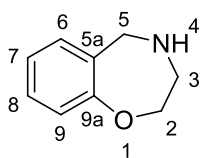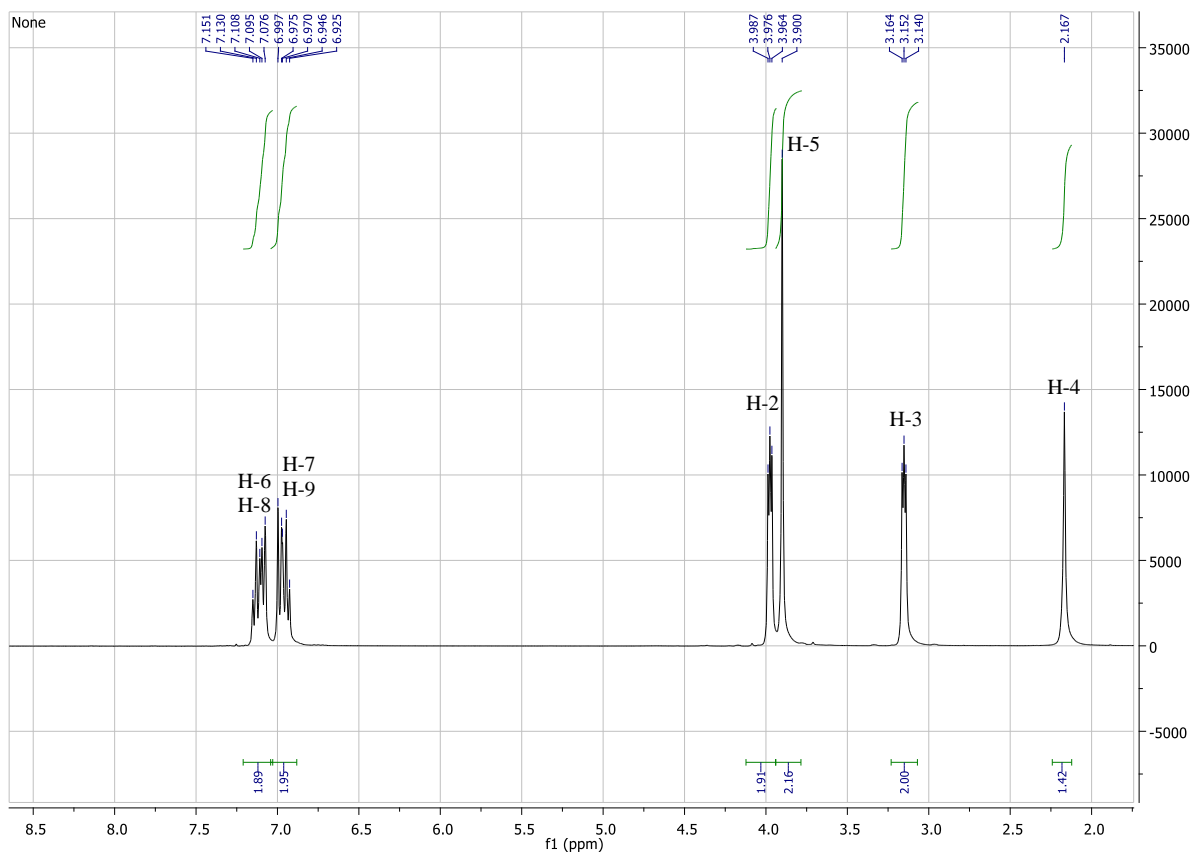

**Figure S4.** <sup>1</sup>H-NMR spectrum of *rac*-**9a** measured in CDCl<sub>3</sub> (400 MHz).

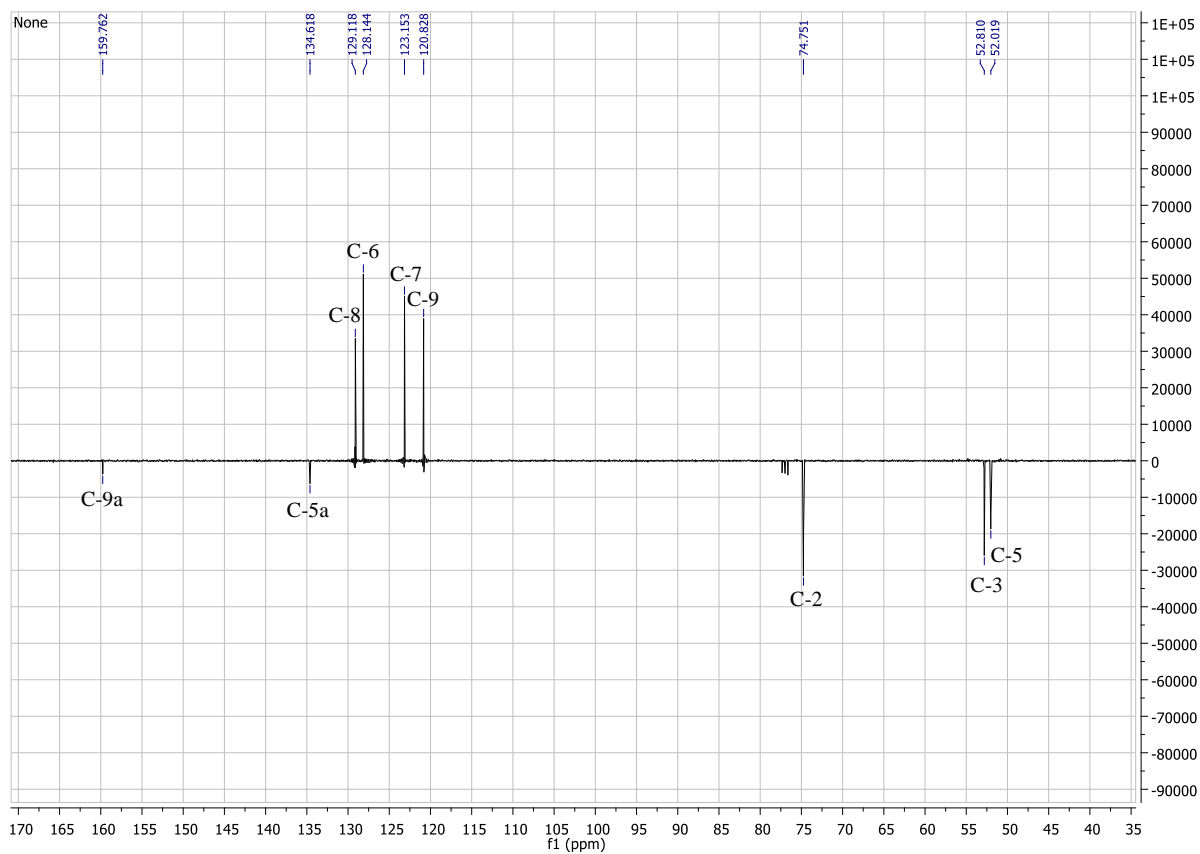

**Figure S5.** J-modulated  $^{13}\text{C}$ -NMR spectrum of *rac*-**9a** measured in  $\text{CDCl}_3$  (100 MHz).

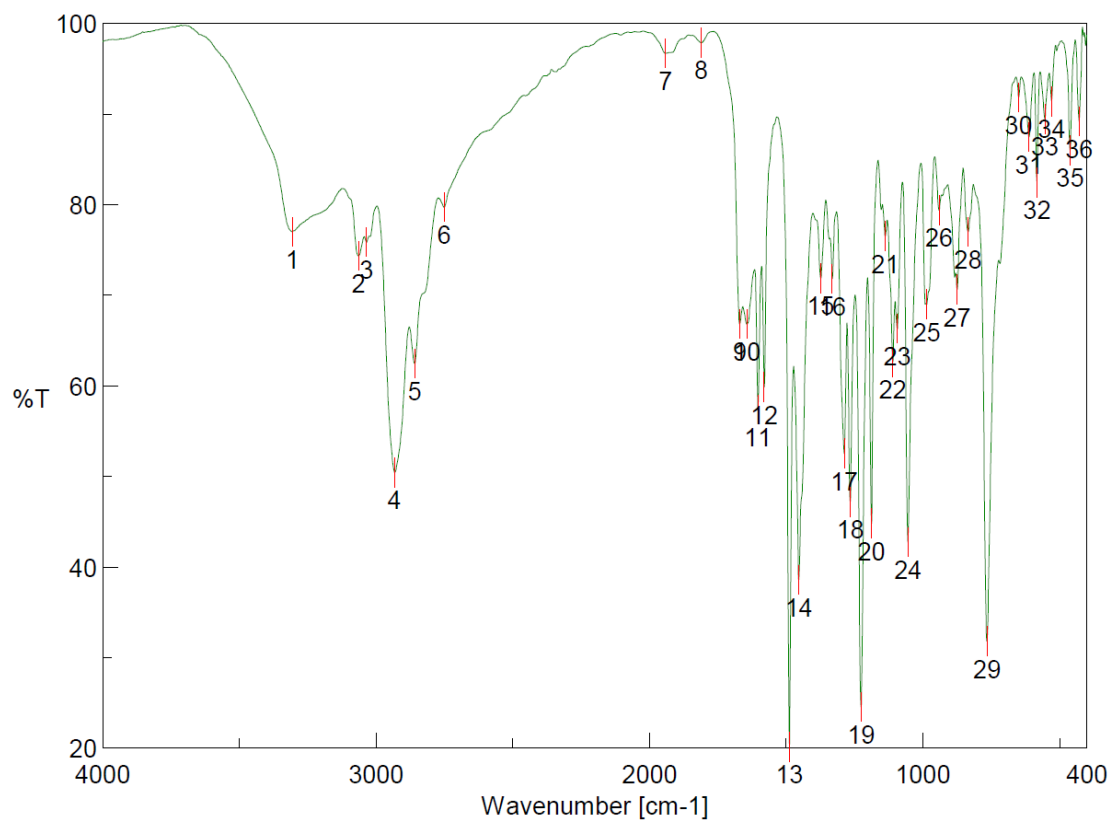

**Figure S6.** IR spectrum of *rac*-9a recorded as KBr disc.

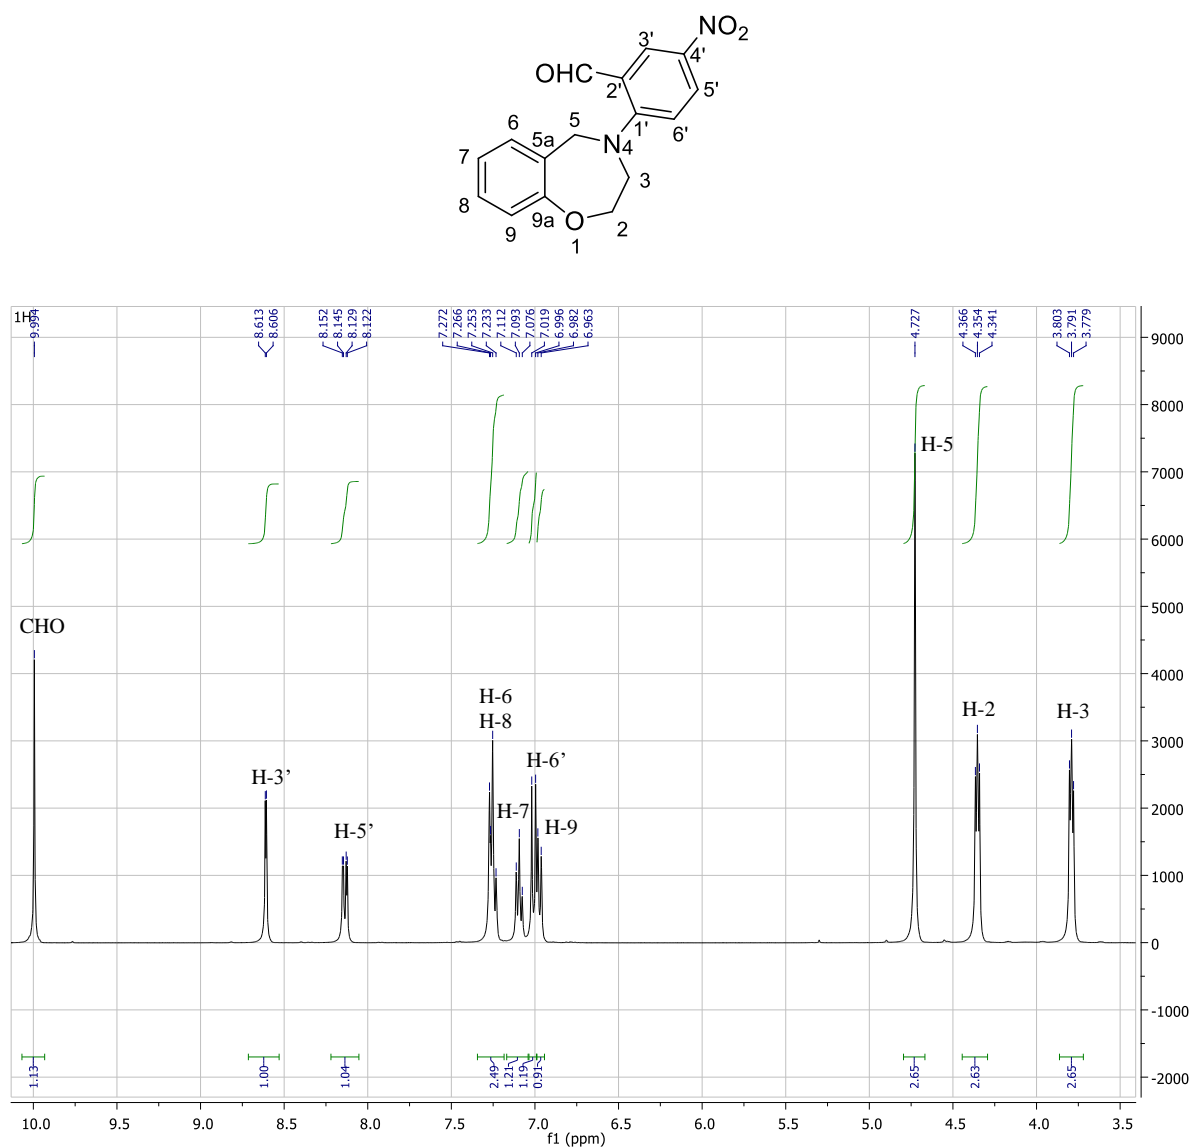

**Figure S7.** <sup>1</sup>H-NMR spectrum of *rac-1a* measured in CDCl<sub>3</sub> (400 MHz).

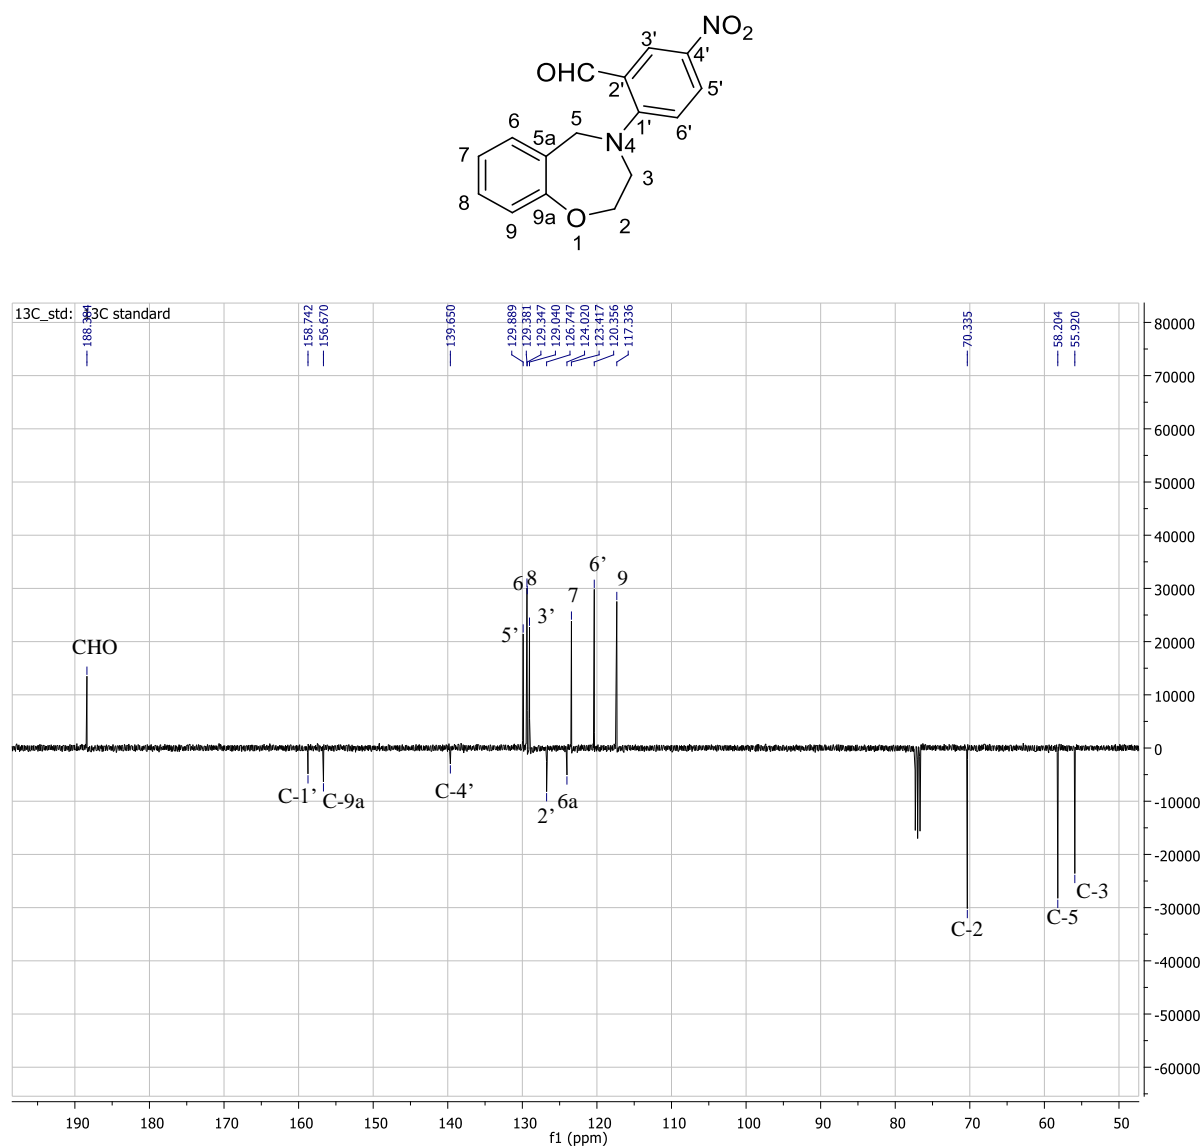

**Figure S8.** J-modulated <sup>13</sup>C-NMR spectrum of *rac-1a* measured in CDCl<sub>3</sub> (100 MHz).

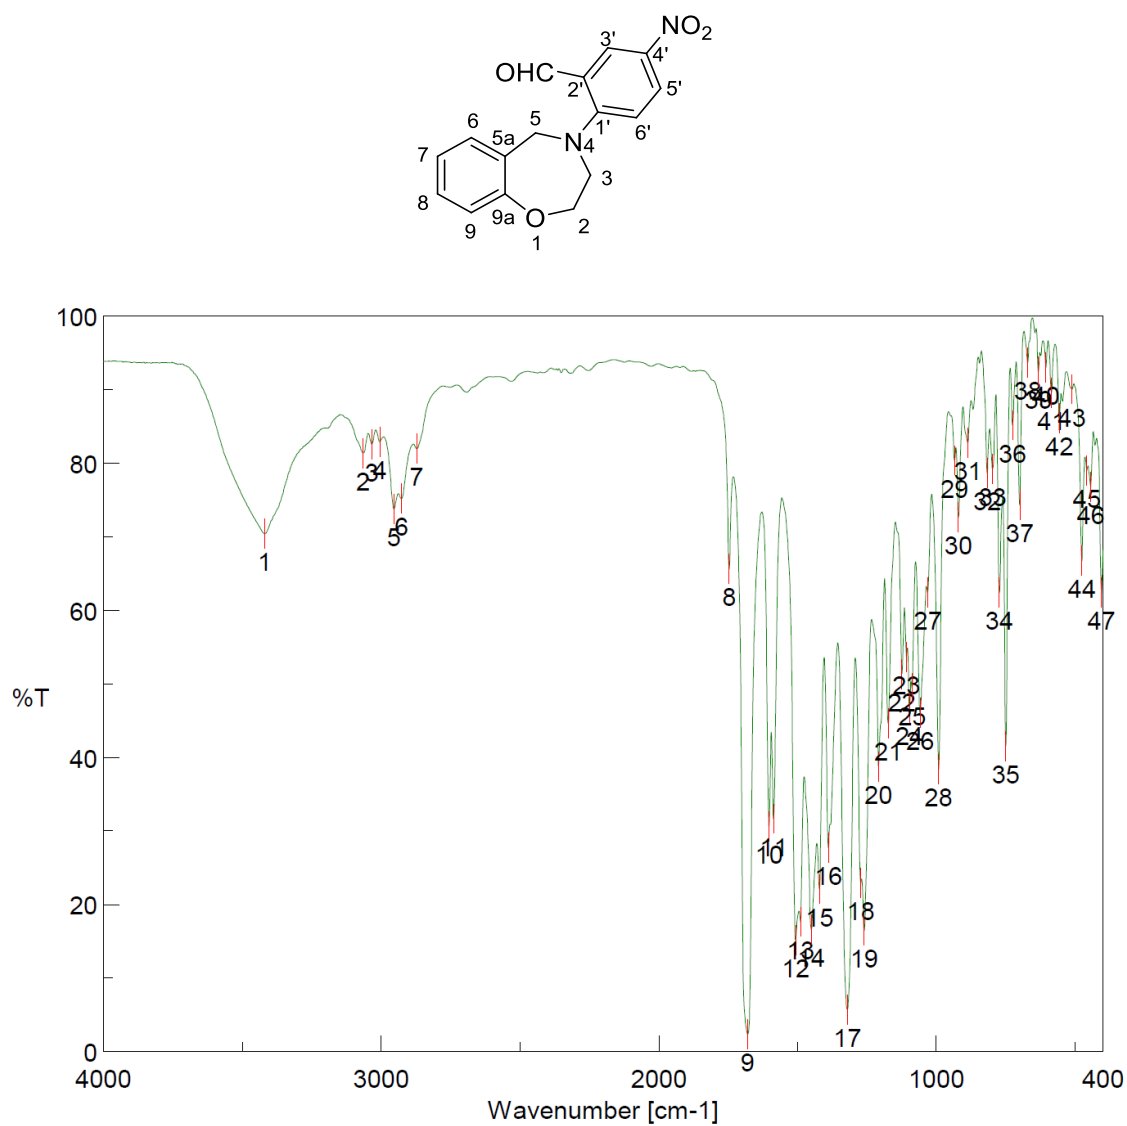

**Figure S9.** IR spectrum of *rac-1a* recorded as KBr disc.

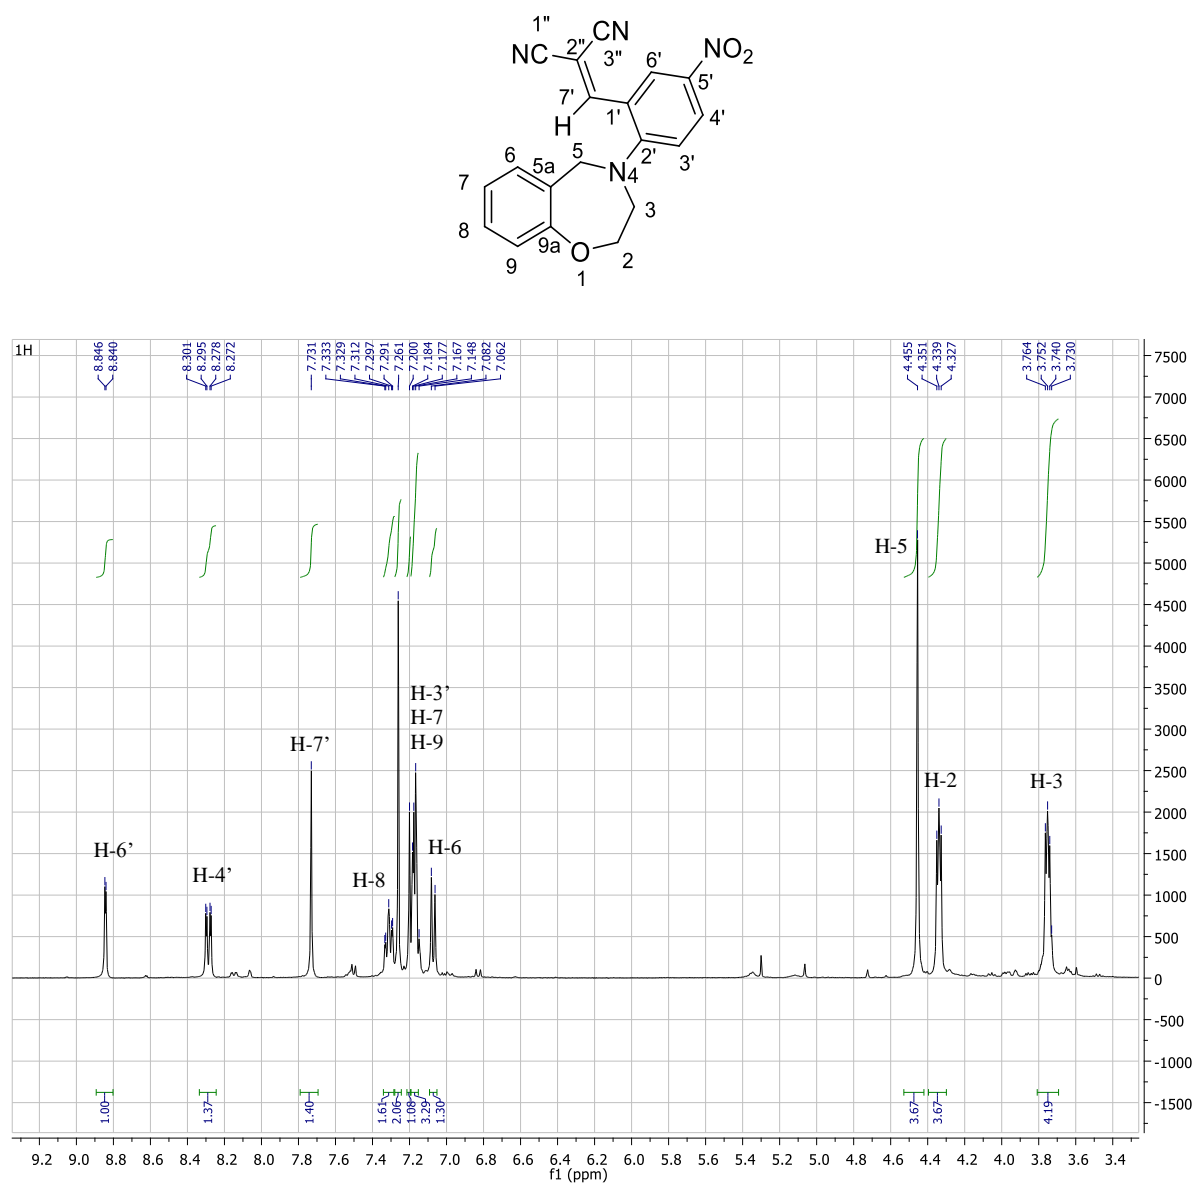

**Figure S10.**  $^1\text{H}$ -NMR spectrum of *rac*-**12a** measured in  $\text{CDCl}_3$  (400 MHz).

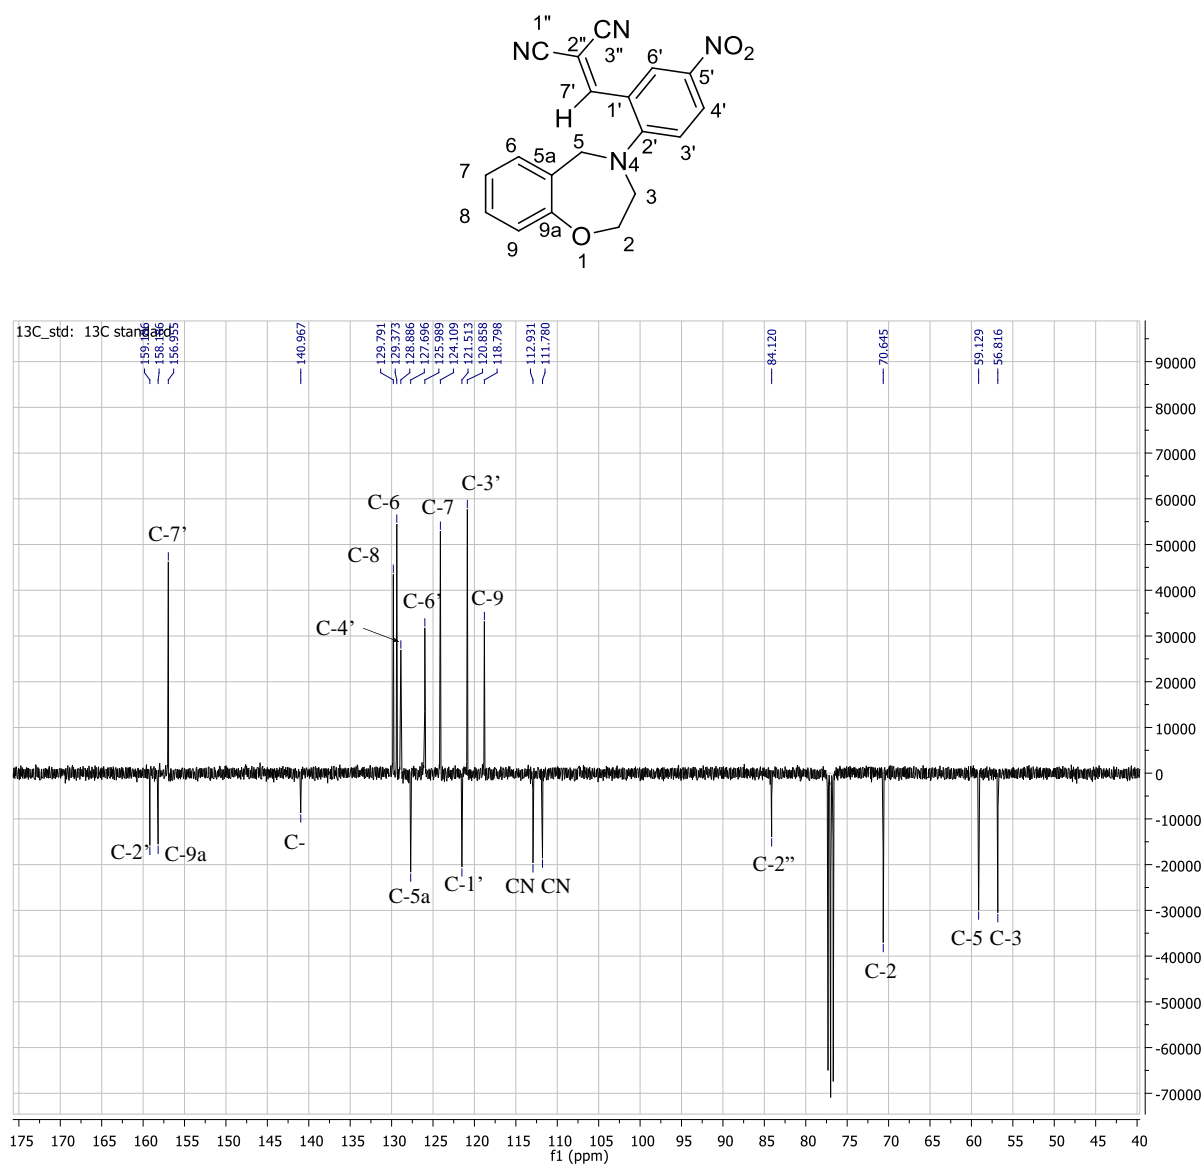

**Figure S11.** J-modulated  $^{13}\text{C}$ -NMR spectrum of *rac*-**12a** measured in  $\text{CDCl}_3$  (100 MHz).

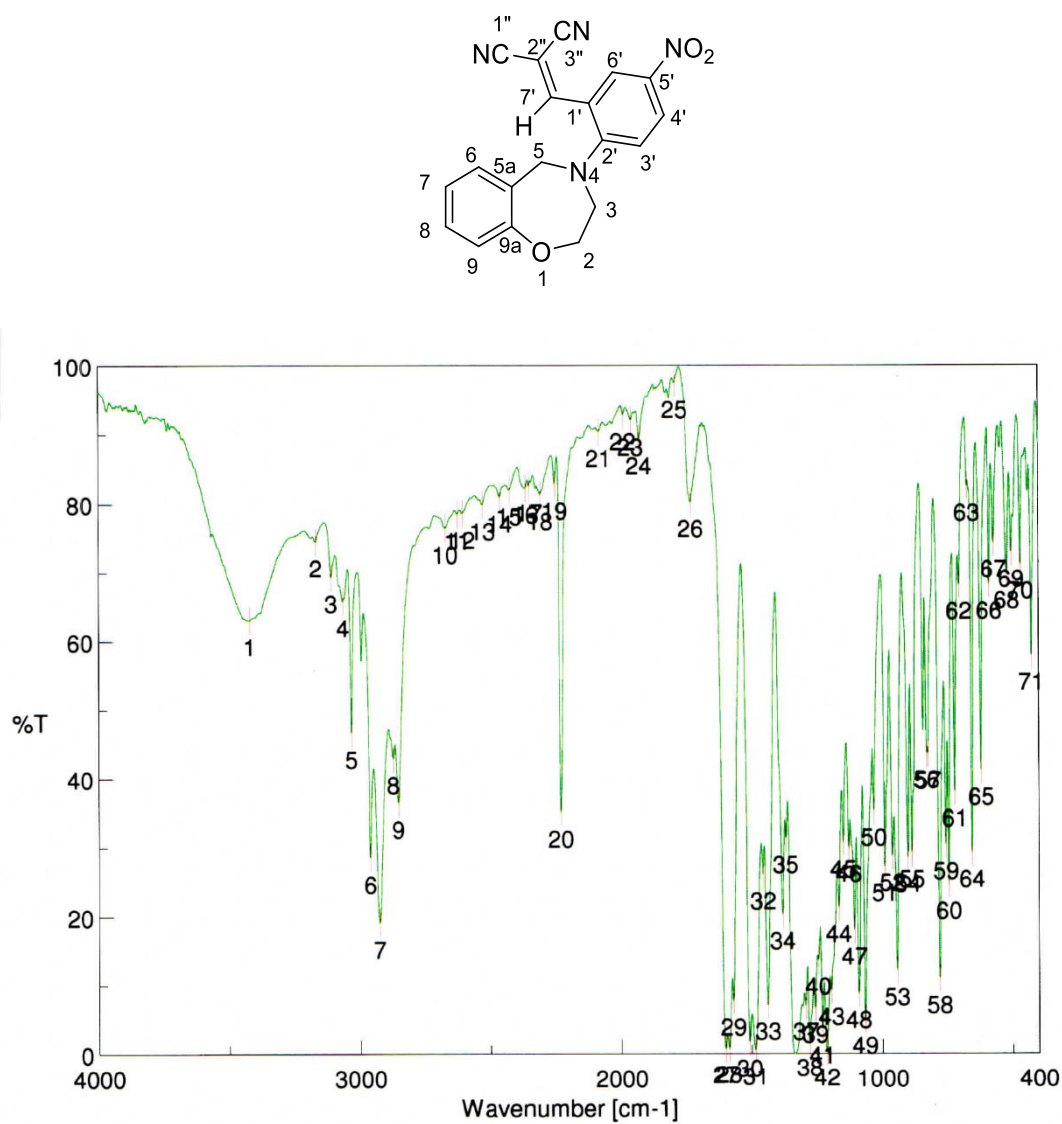

**Figure S12.** IR spectrum of *rac-12a* recorded as KBr disc.

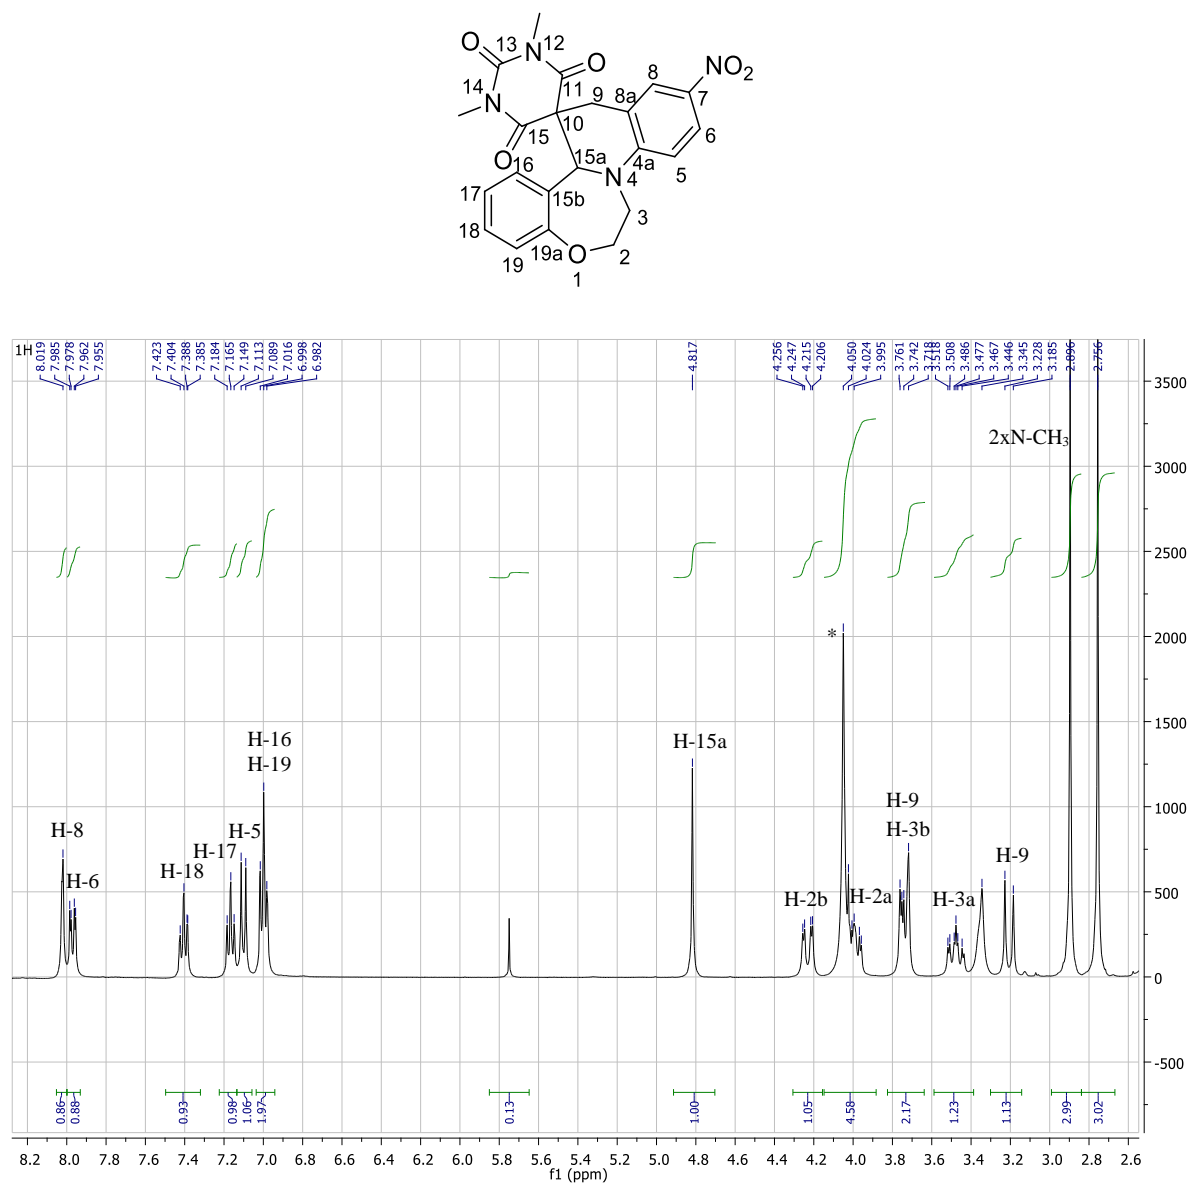

**Figure S13.** <sup>1</sup>H-NMR spectrum of *rac*-10a measured in CDCl<sub>3</sub> (400 MHz).

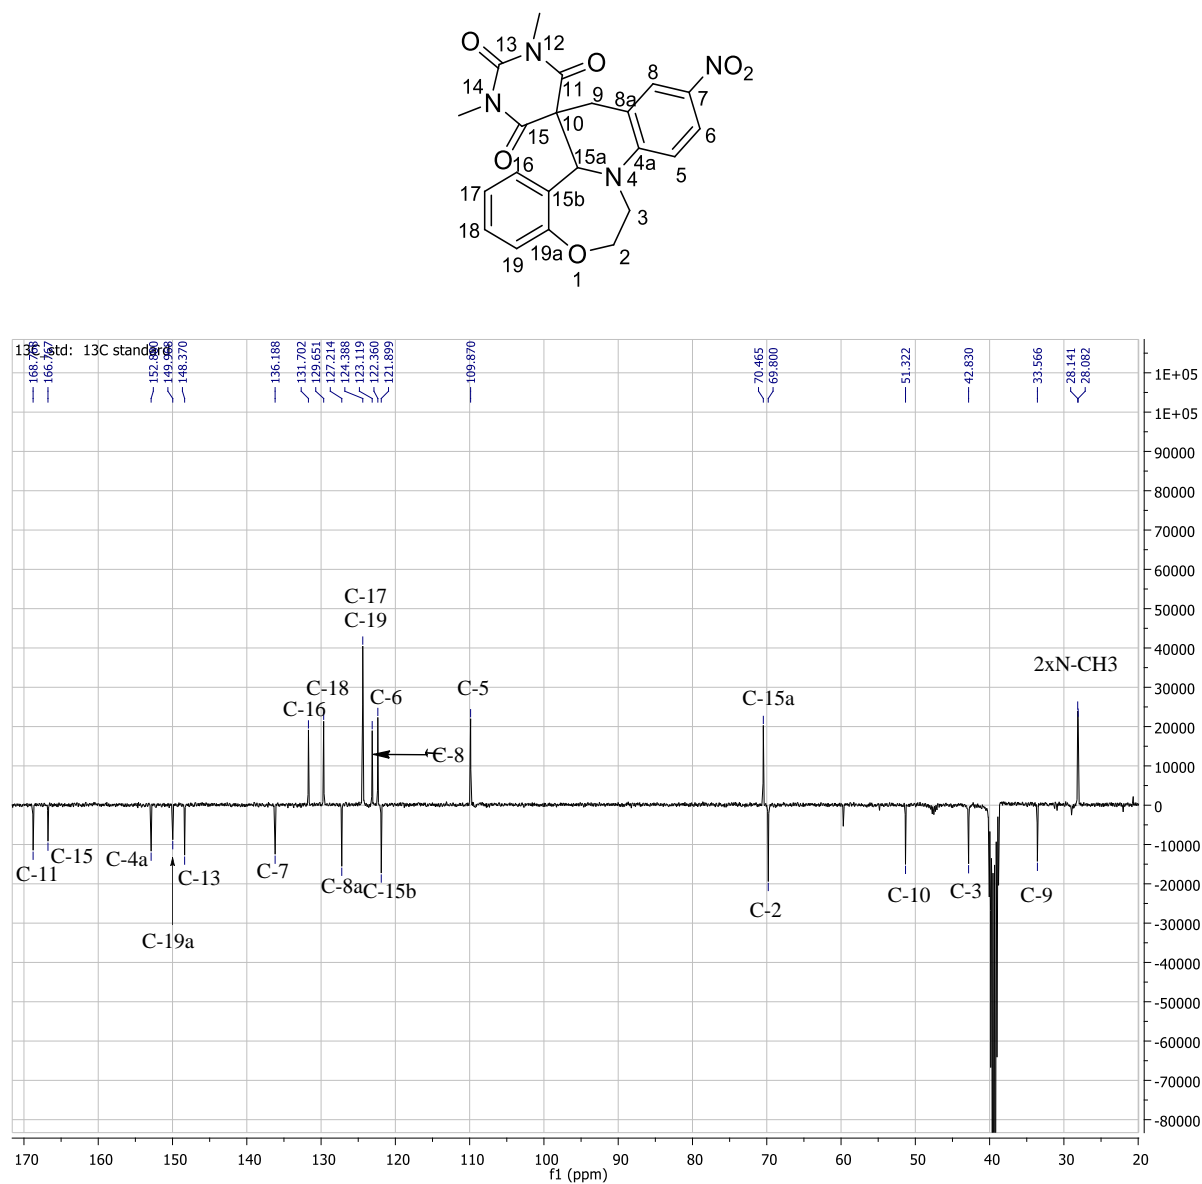

**Figure S14.** J-modulated <sup>13</sup>C-NMR spectrum of *rac*-**10a** measured in CDCl<sub>3</sub> (100 MHz).

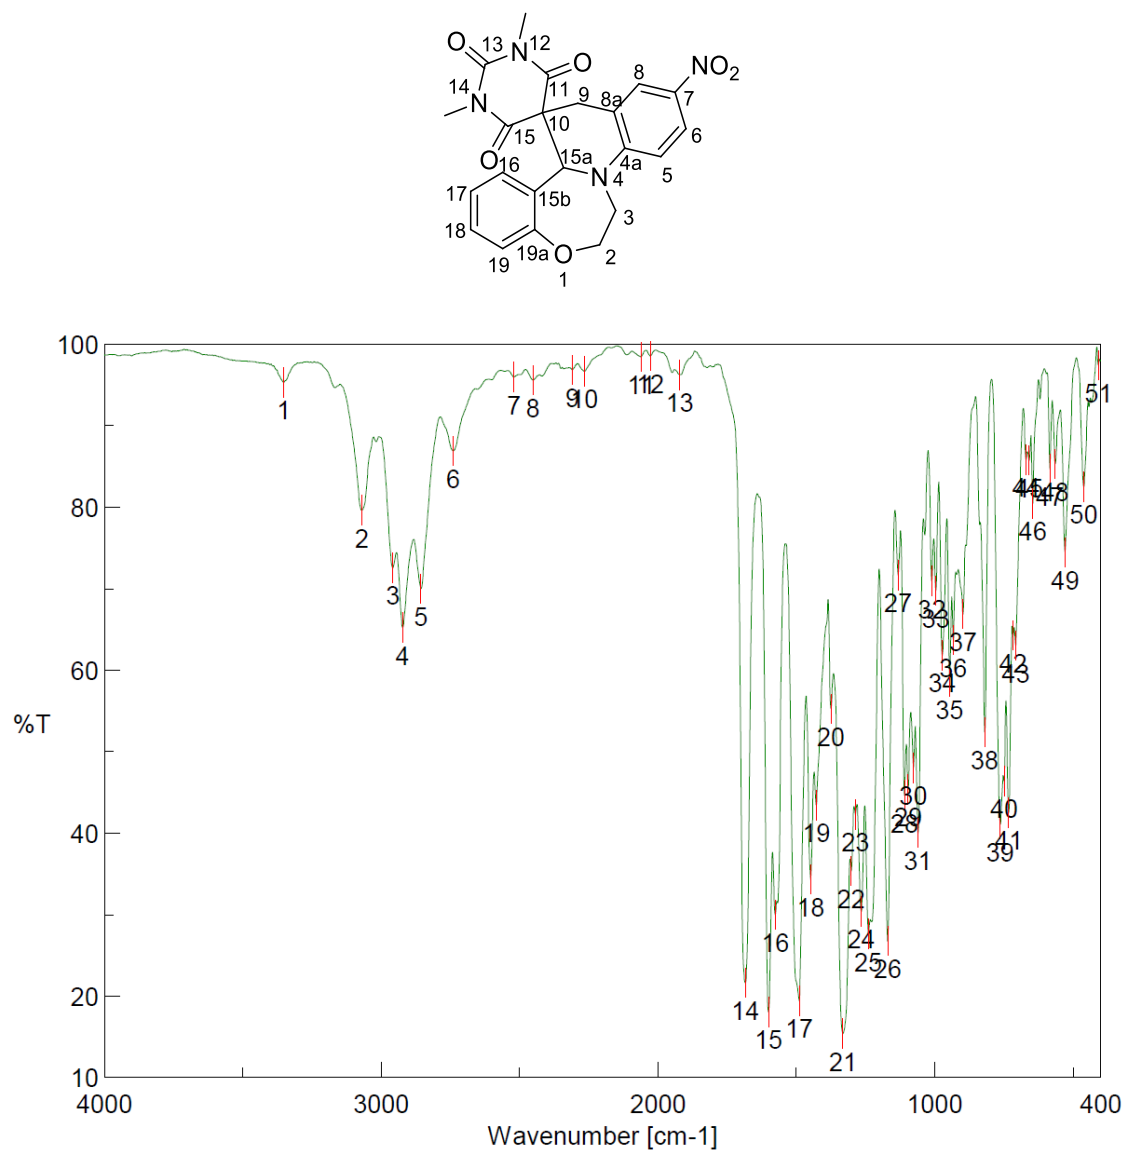

**Figure S15.** IR spectrum of *rac*-**10a** recorded as KBr disc

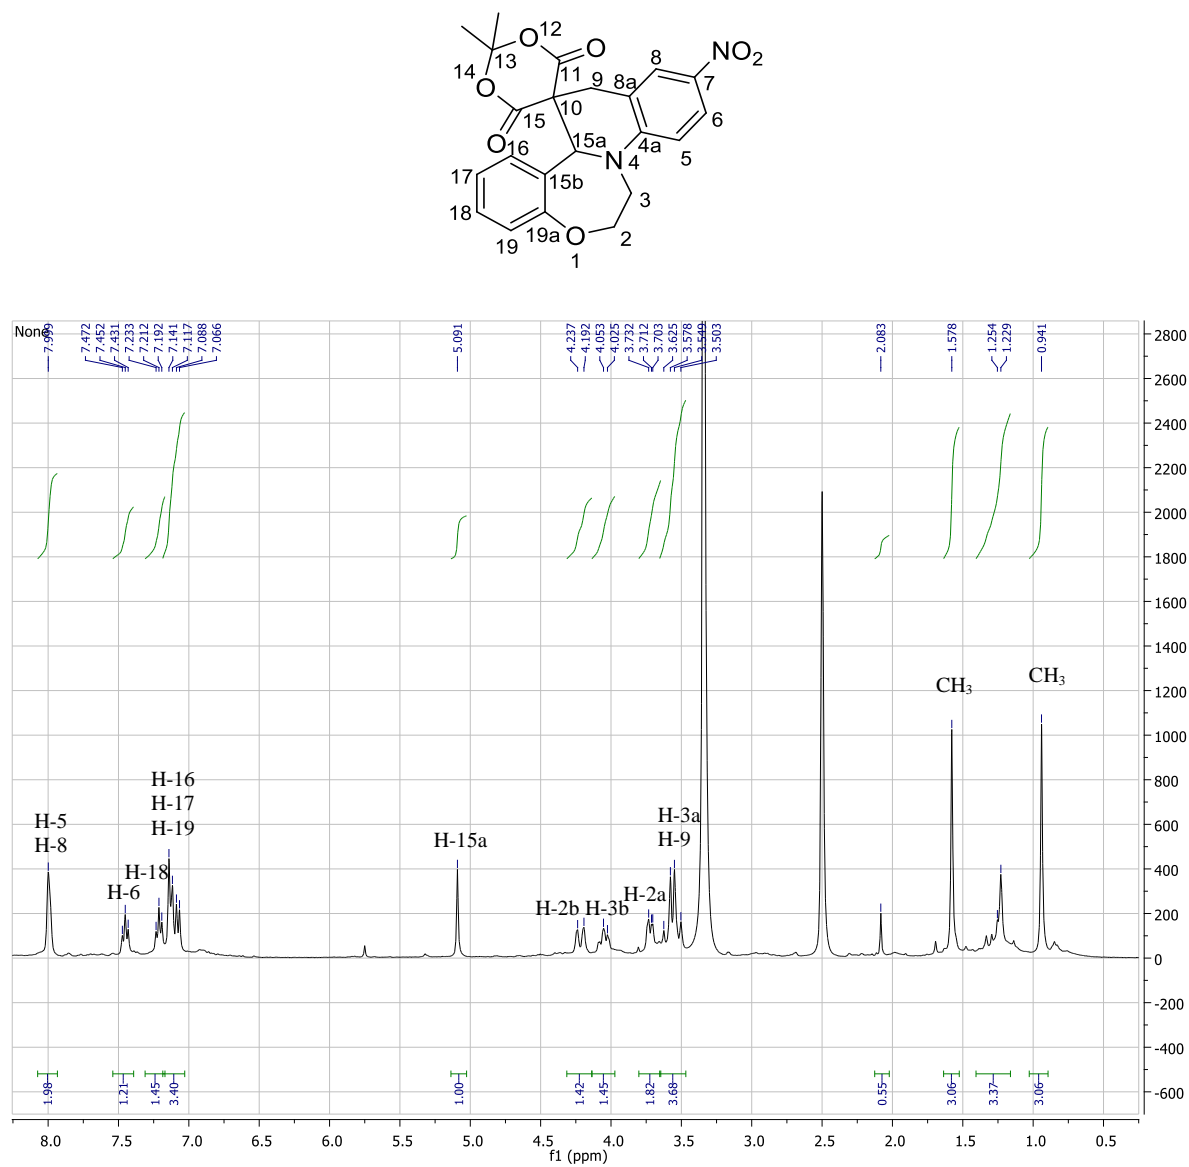

**Figure S16.** <sup>1</sup>H-NMR spectrum of *rac*-11a measured in DMSO-d<sub>6</sub> (400 MHz)

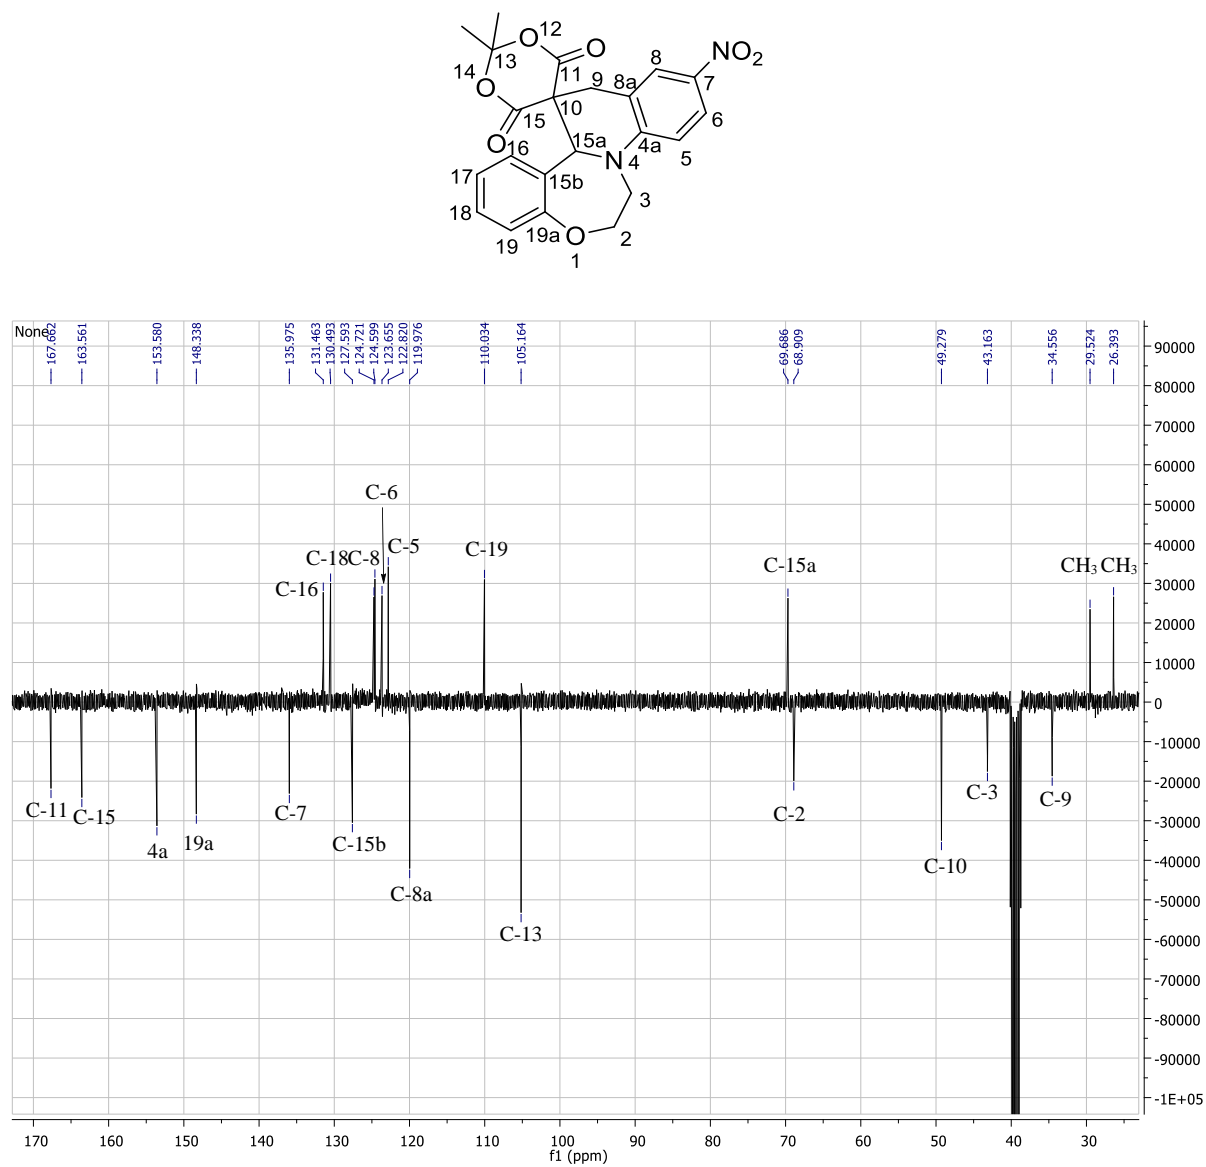

**Figure S17.** J-modulated <sup>13</sup>C-NMR spectrum of *rac*-**11a** measured in DMSO-d<sub>6</sub> (100 MHz)

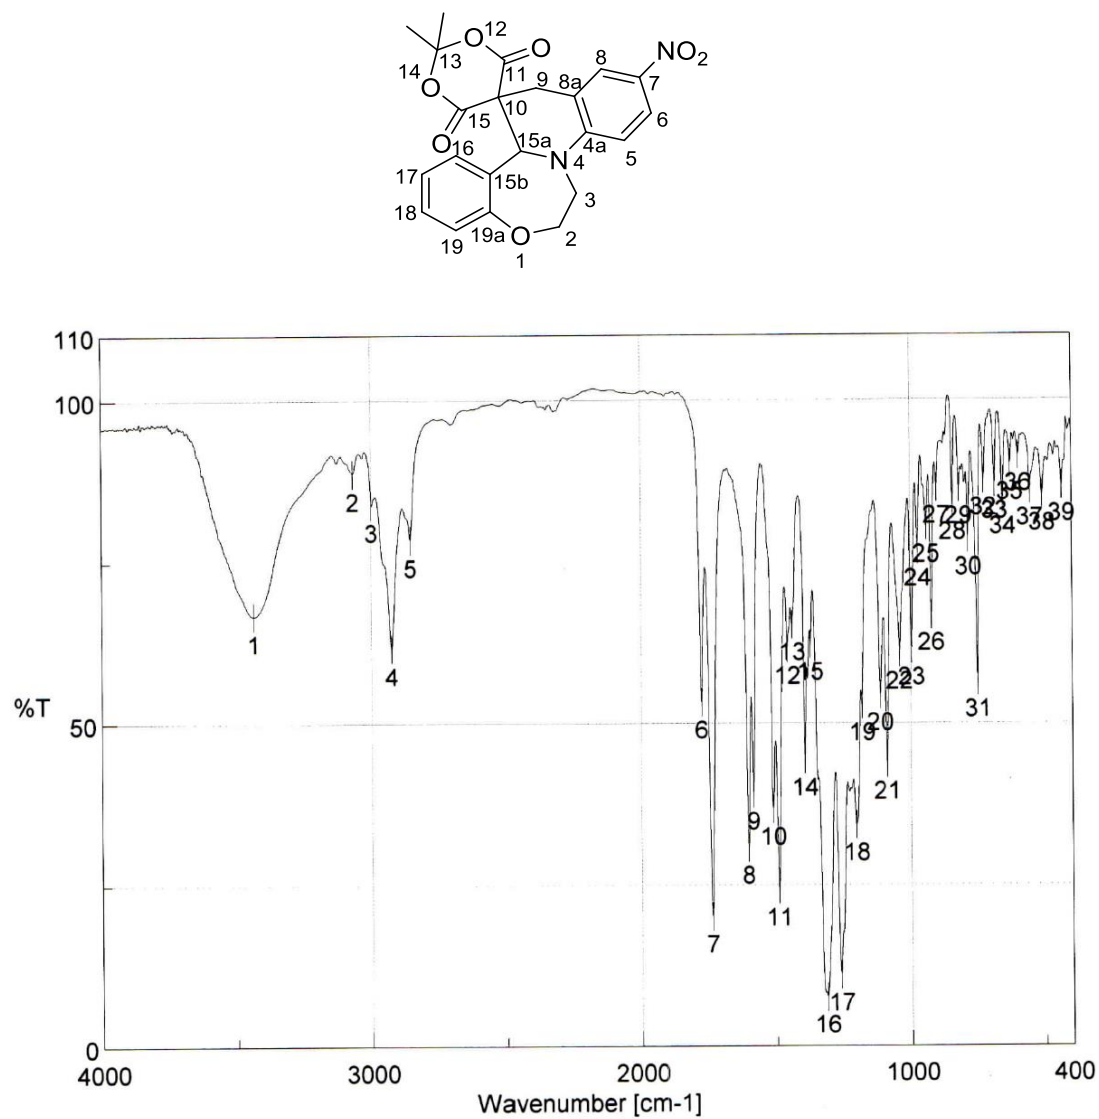

**Figure S18.** IR spectrum of *rac*-11a recorded as KBr disc

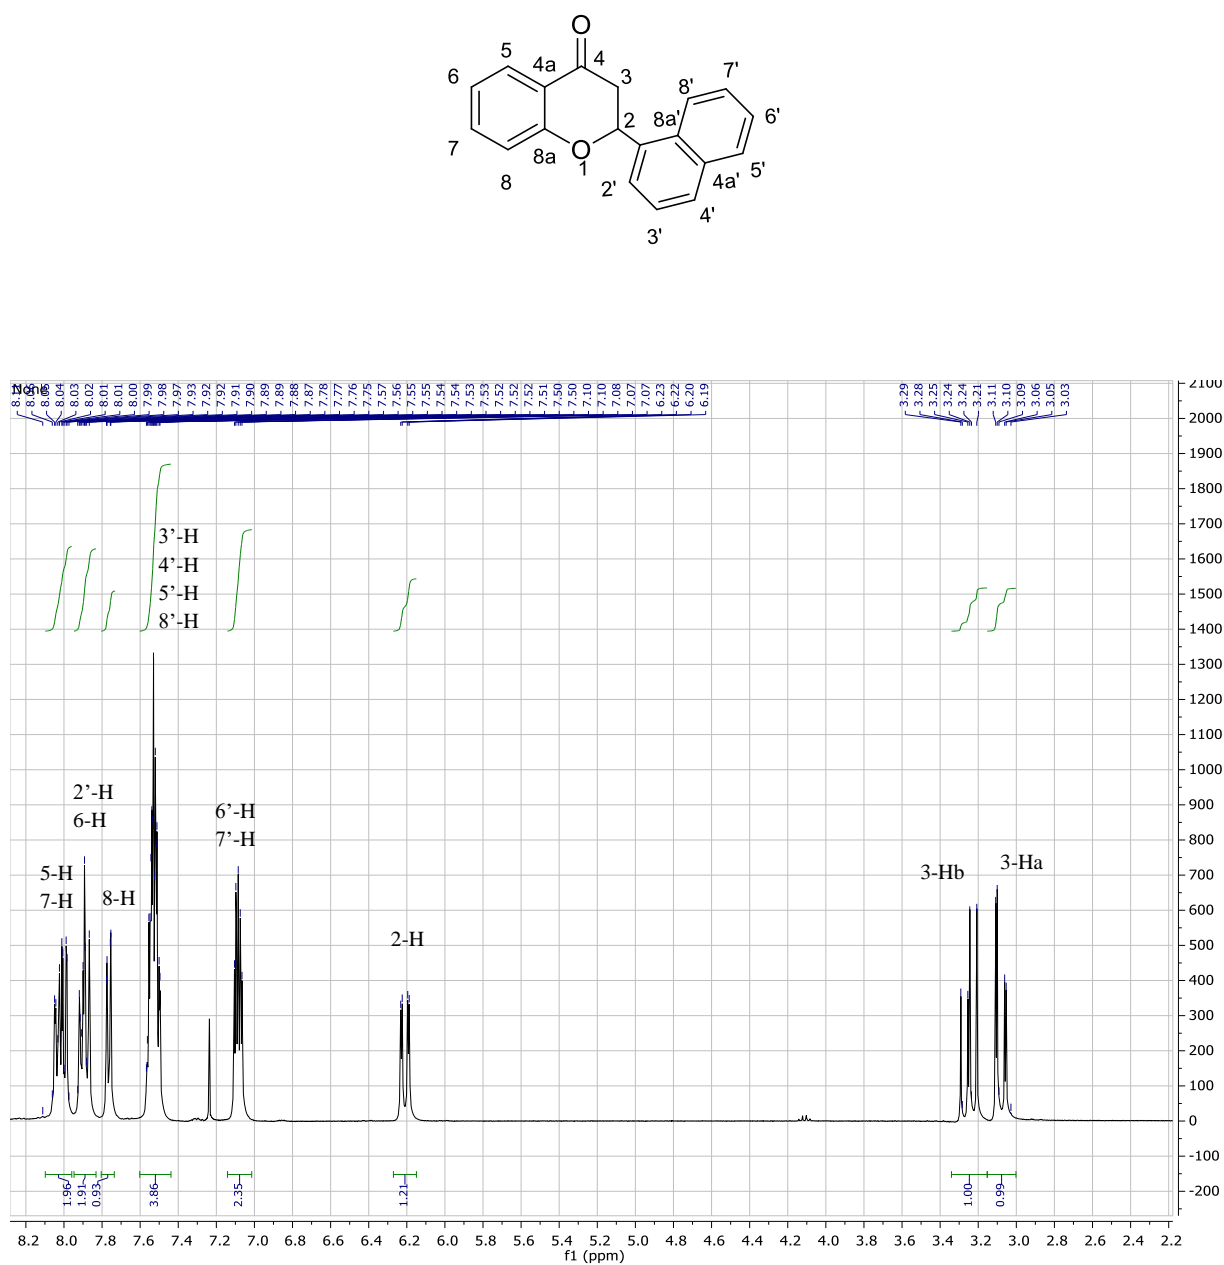

**Figure S19.**  $^1\text{H}$ -NMR spectrum of *rac-7b* measured in  $\text{CDCl}_3$  (360 MHz)

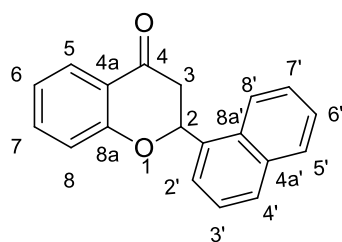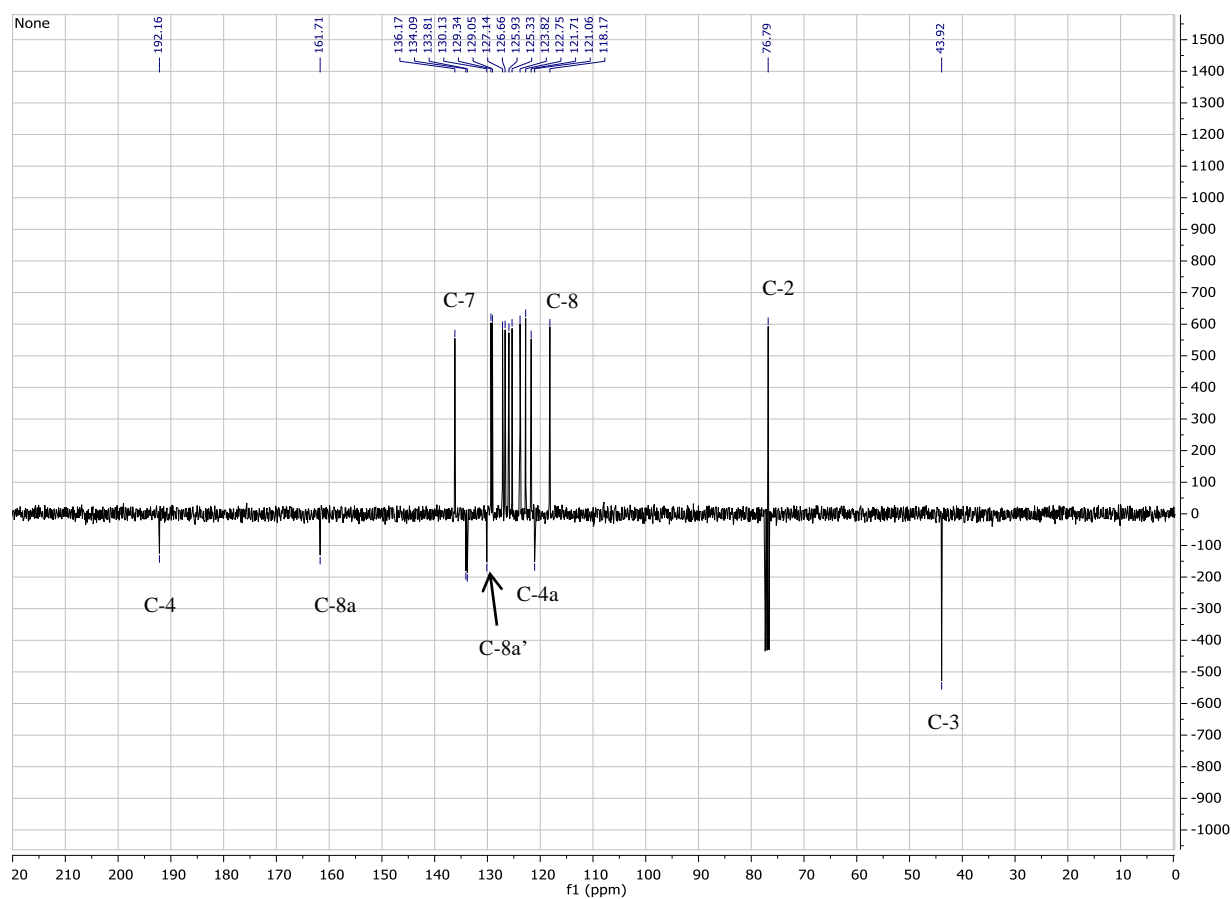

**Figure S20.** J-modulated  $^{13}\text{C}$ -NMR spectrum of *rac*-**7b** measured in  $\text{CDCl}_3$  (90 MHz)

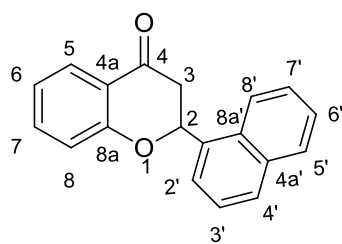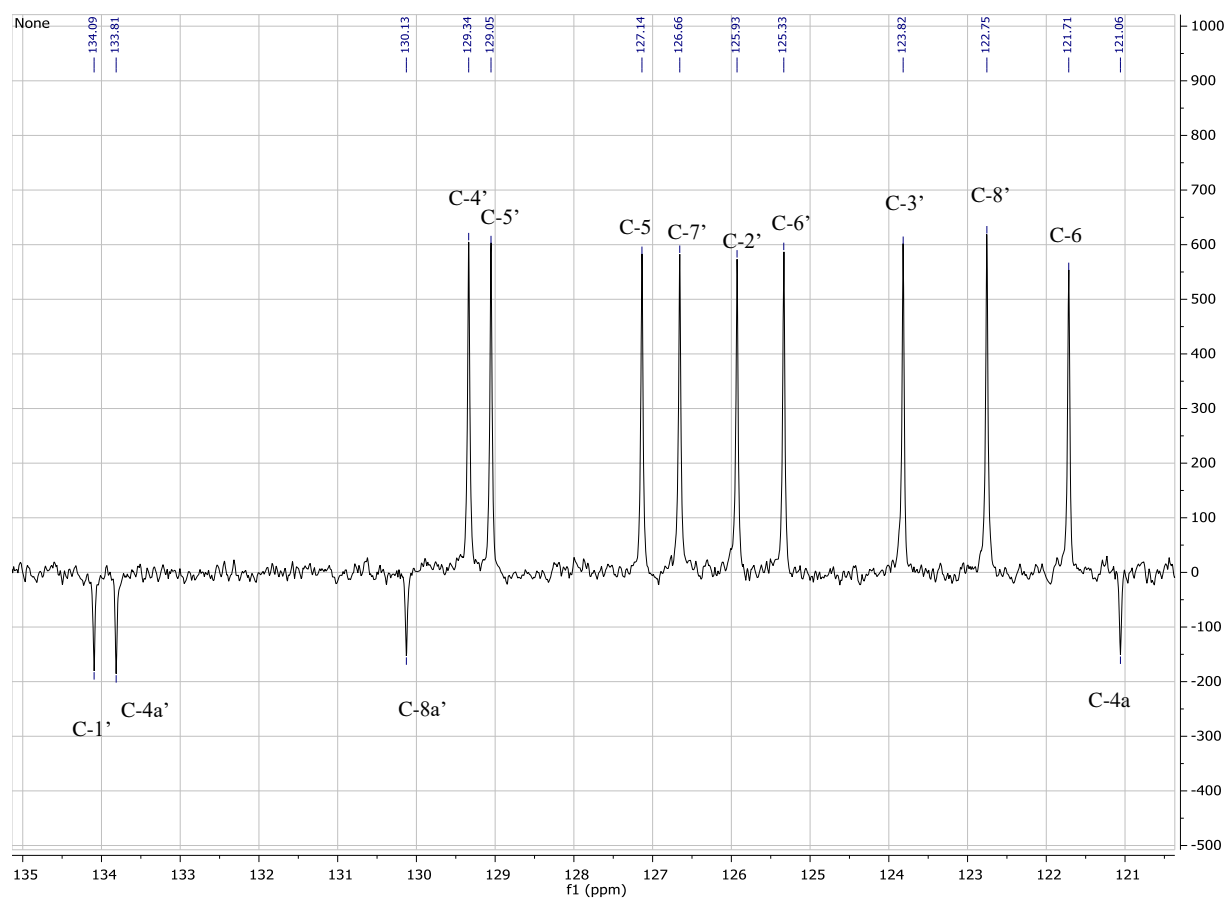

**Figure S21.** J-modulated  $^{13}\text{C}$ -NMR spectrum of *rac*-**7b** measured in  $\text{CDCl}_3$  (90 MHz)

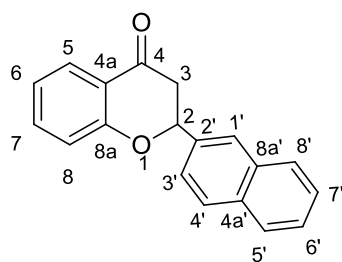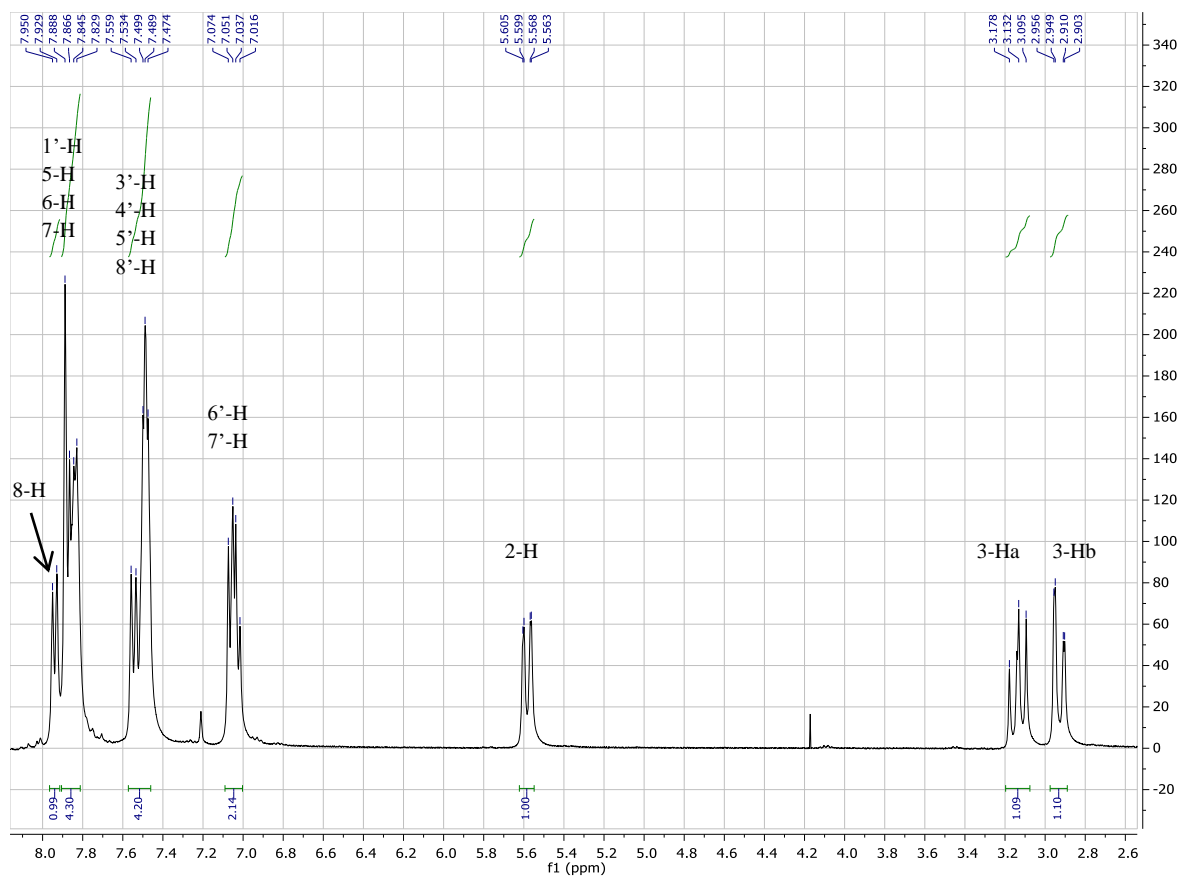

**Figure S22.**  $^1\text{H}$ -NMR spectrum of *rac*-**7c** measured in  $\text{CDCl}_3$  (360 MHz)

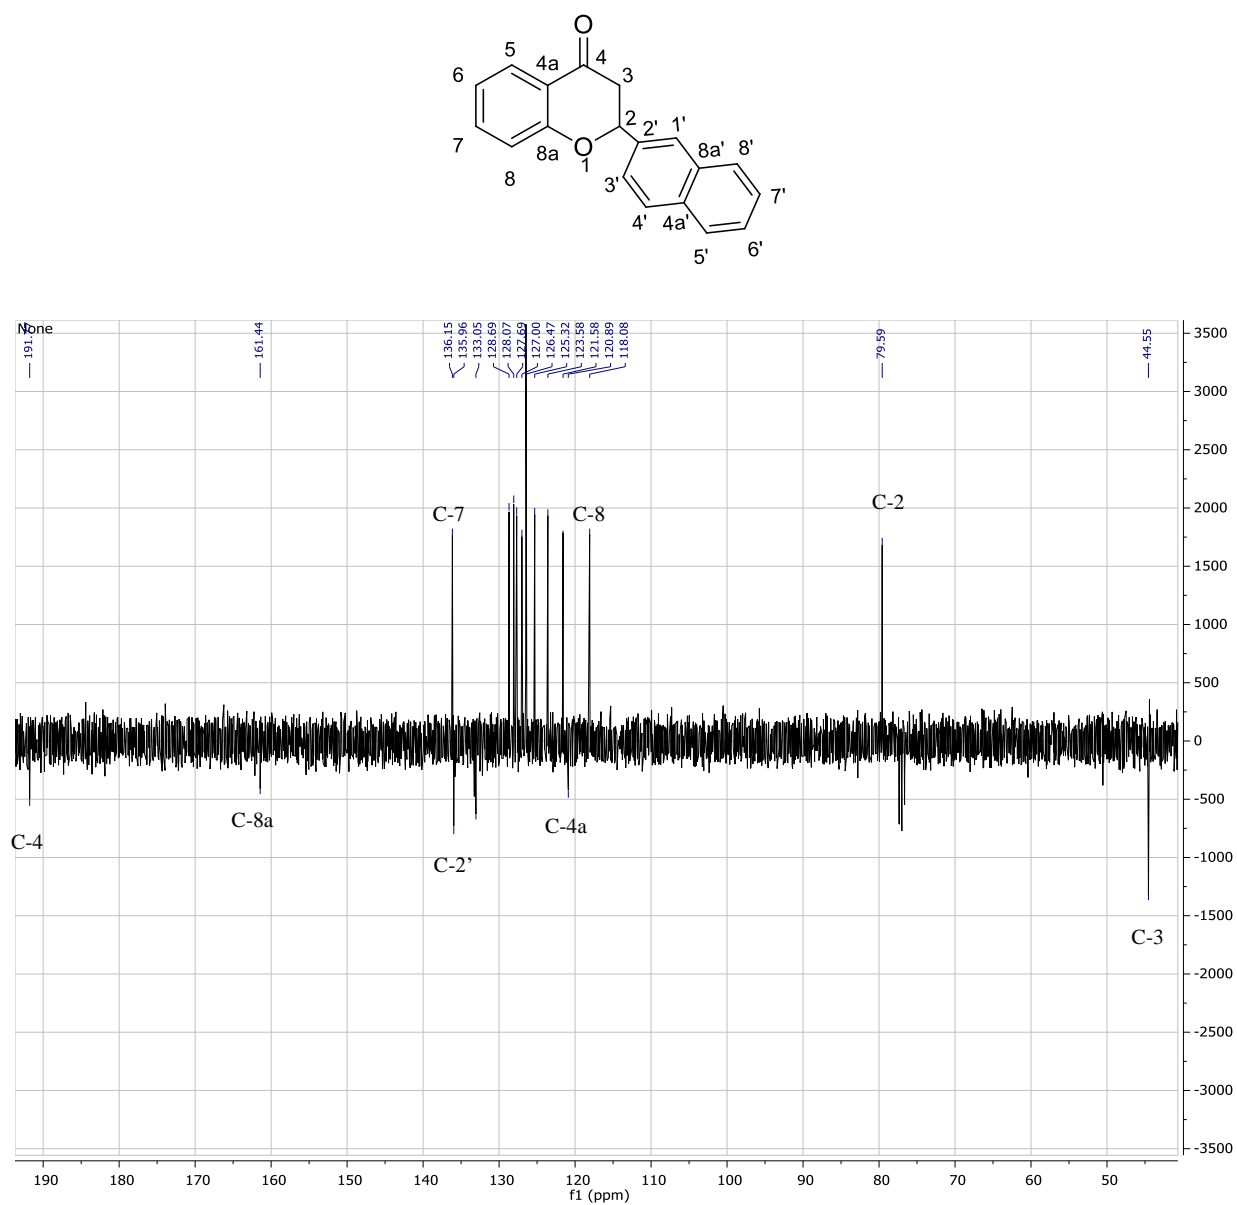

**Figure S23.** J-modulated  $^{13}\text{C}$ -NMR spectrum of *rac-7c* measured in  $\text{CDCl}_3$  (90 MHz)

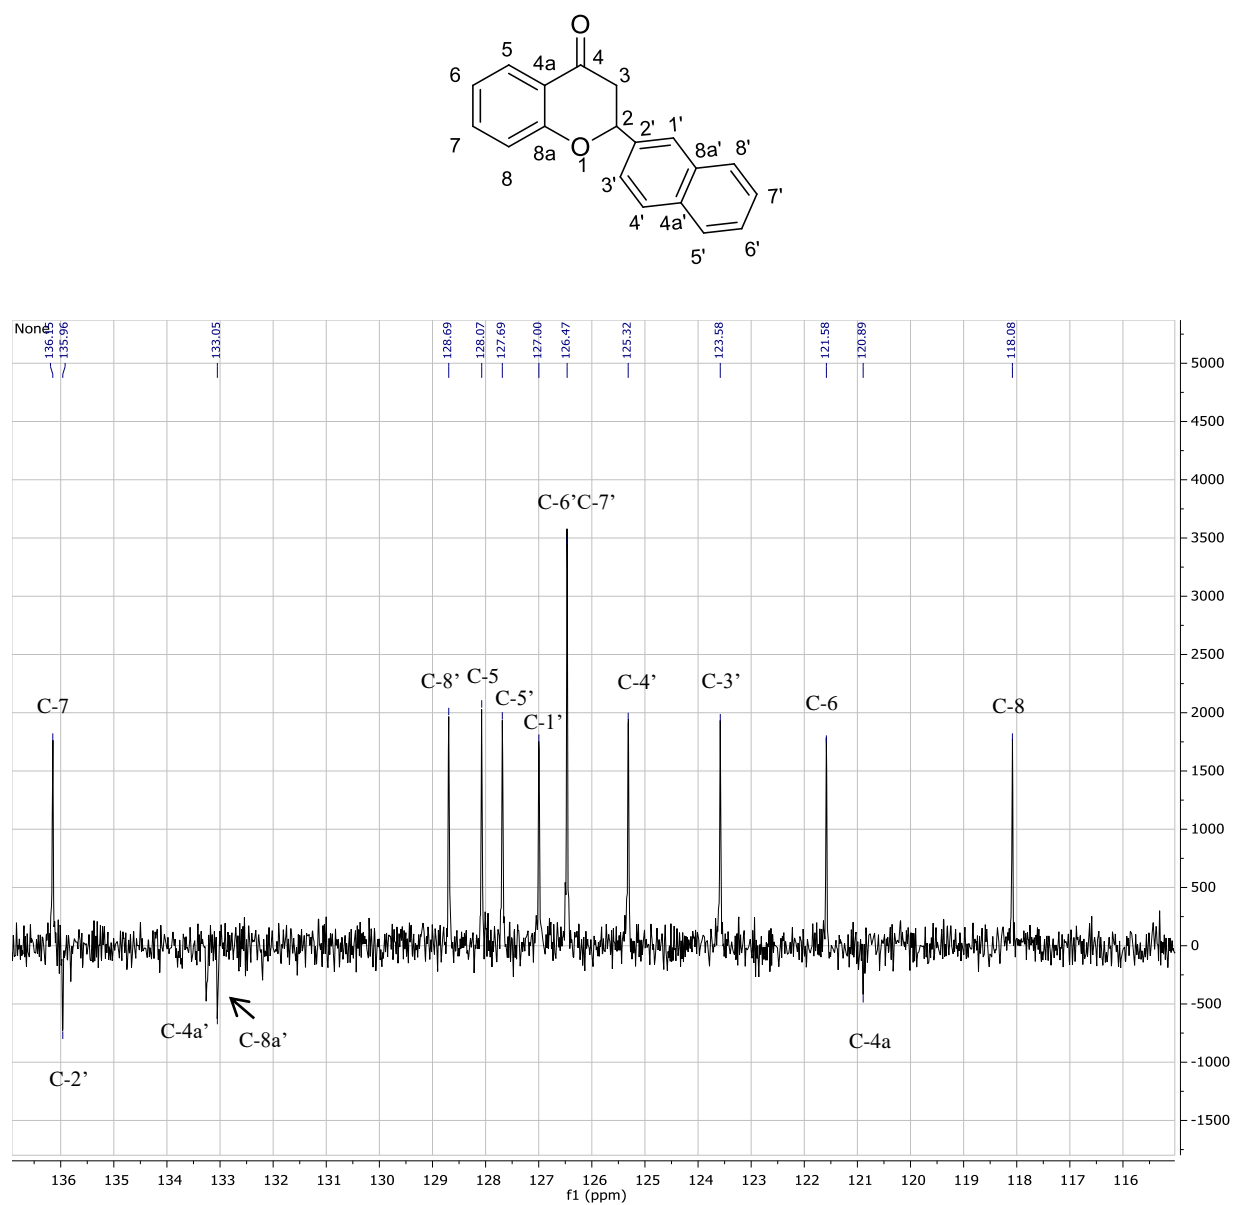

**Figure S24.** J-modulated  $^{13}\text{C}$ -NMR spectrum of *rac-7c* measured in  $\text{CDCl}_3$  (90 MHz)

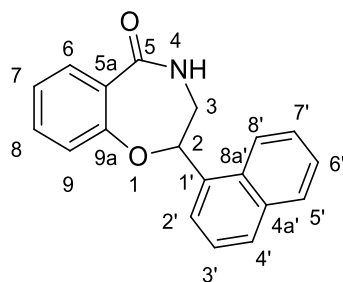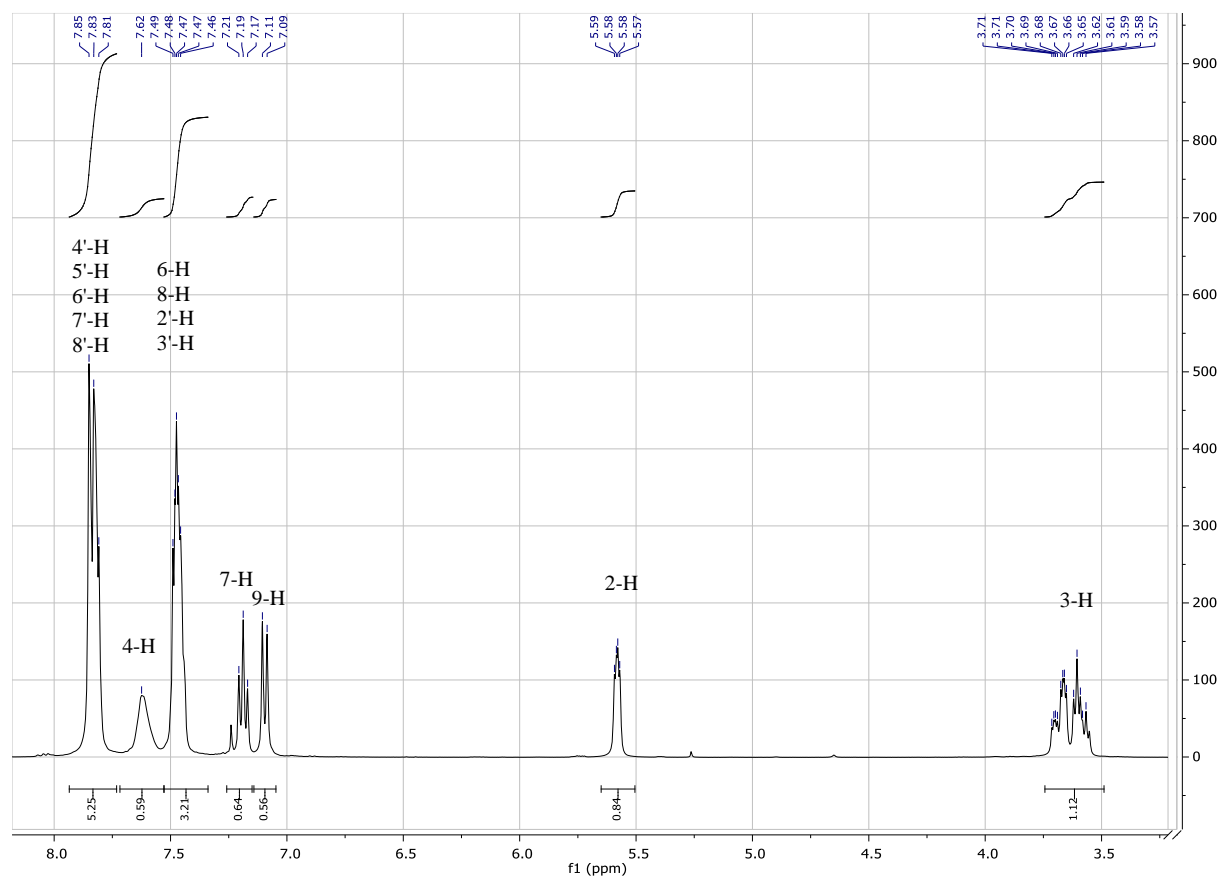

**Figure S25.**  $^1\text{H}$ -NMR spectrum of *rac*-**8b** measured in  $\text{CDCl}_3$  (400 MHz)

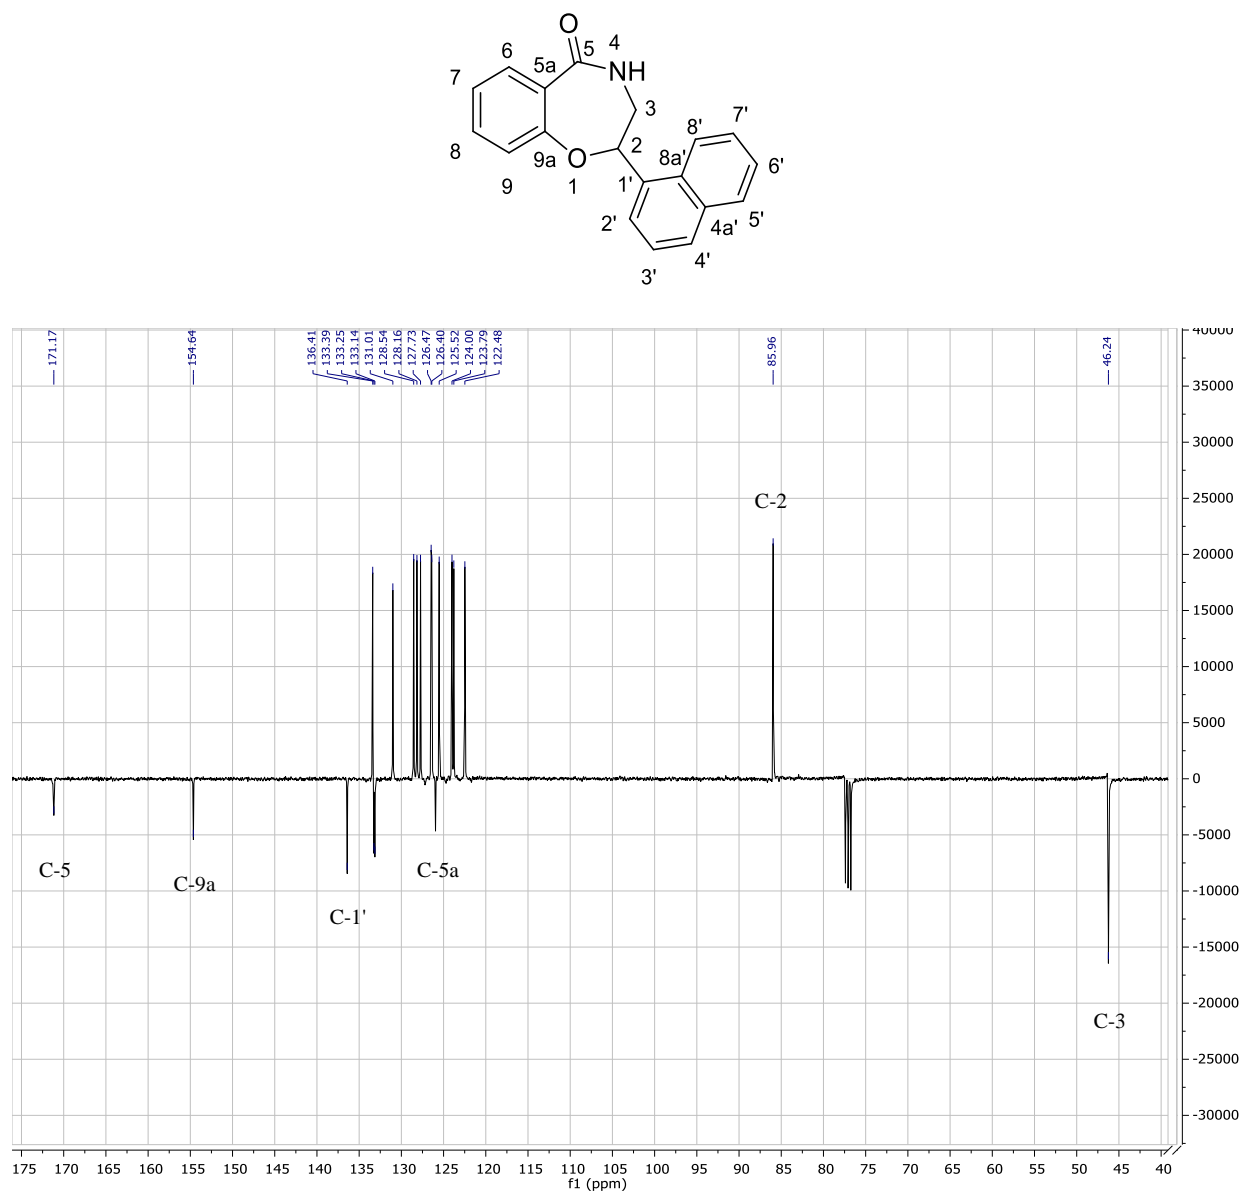

**Figure S26.** J-modulated <sup>13</sup>C-NMR spectrum of *rac-8b* measured in CDCl<sub>3</sub> (100 MHz)

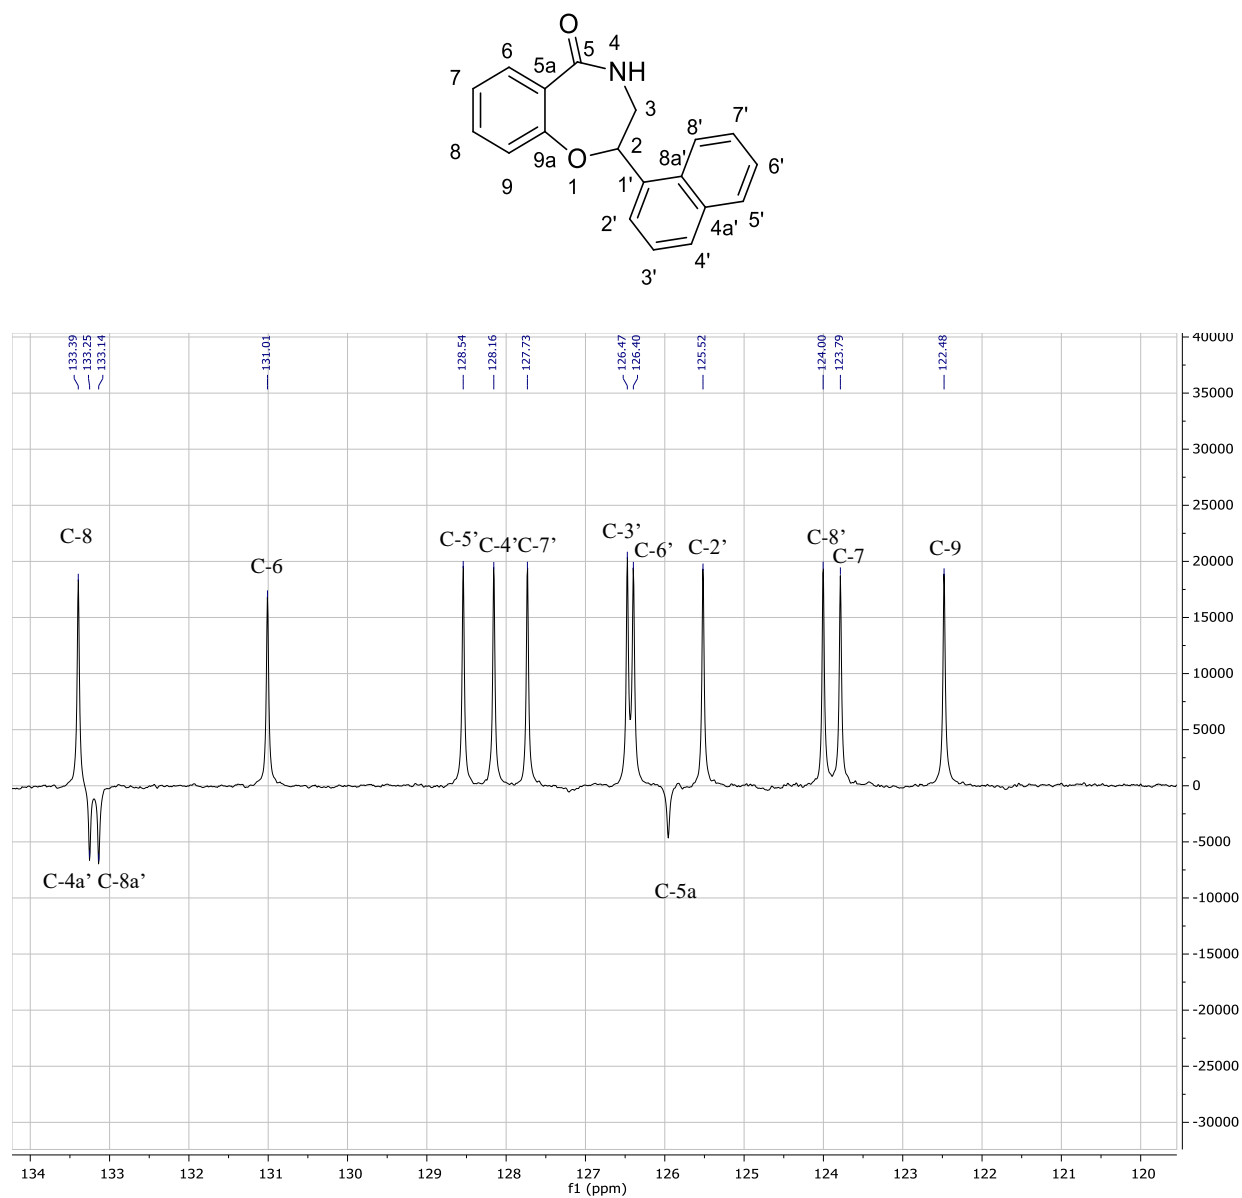

**Figure S27.** J-modulated <sup>13</sup>C-NMR spectra of *rac-8b* measured in CDCl<sub>3</sub> (100 MHz)

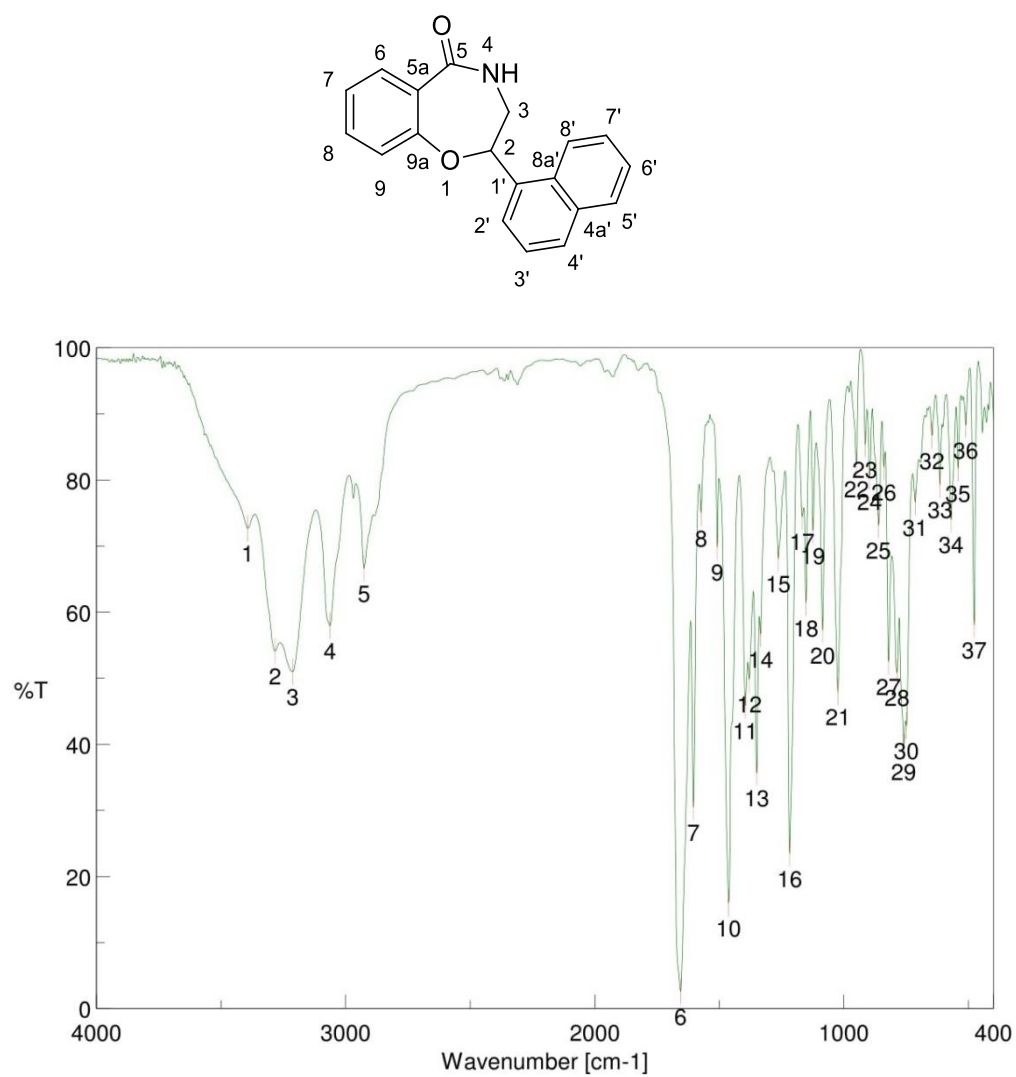

**Figure S28** IR spectra of *rac*-**8b** recorded as KBr disc

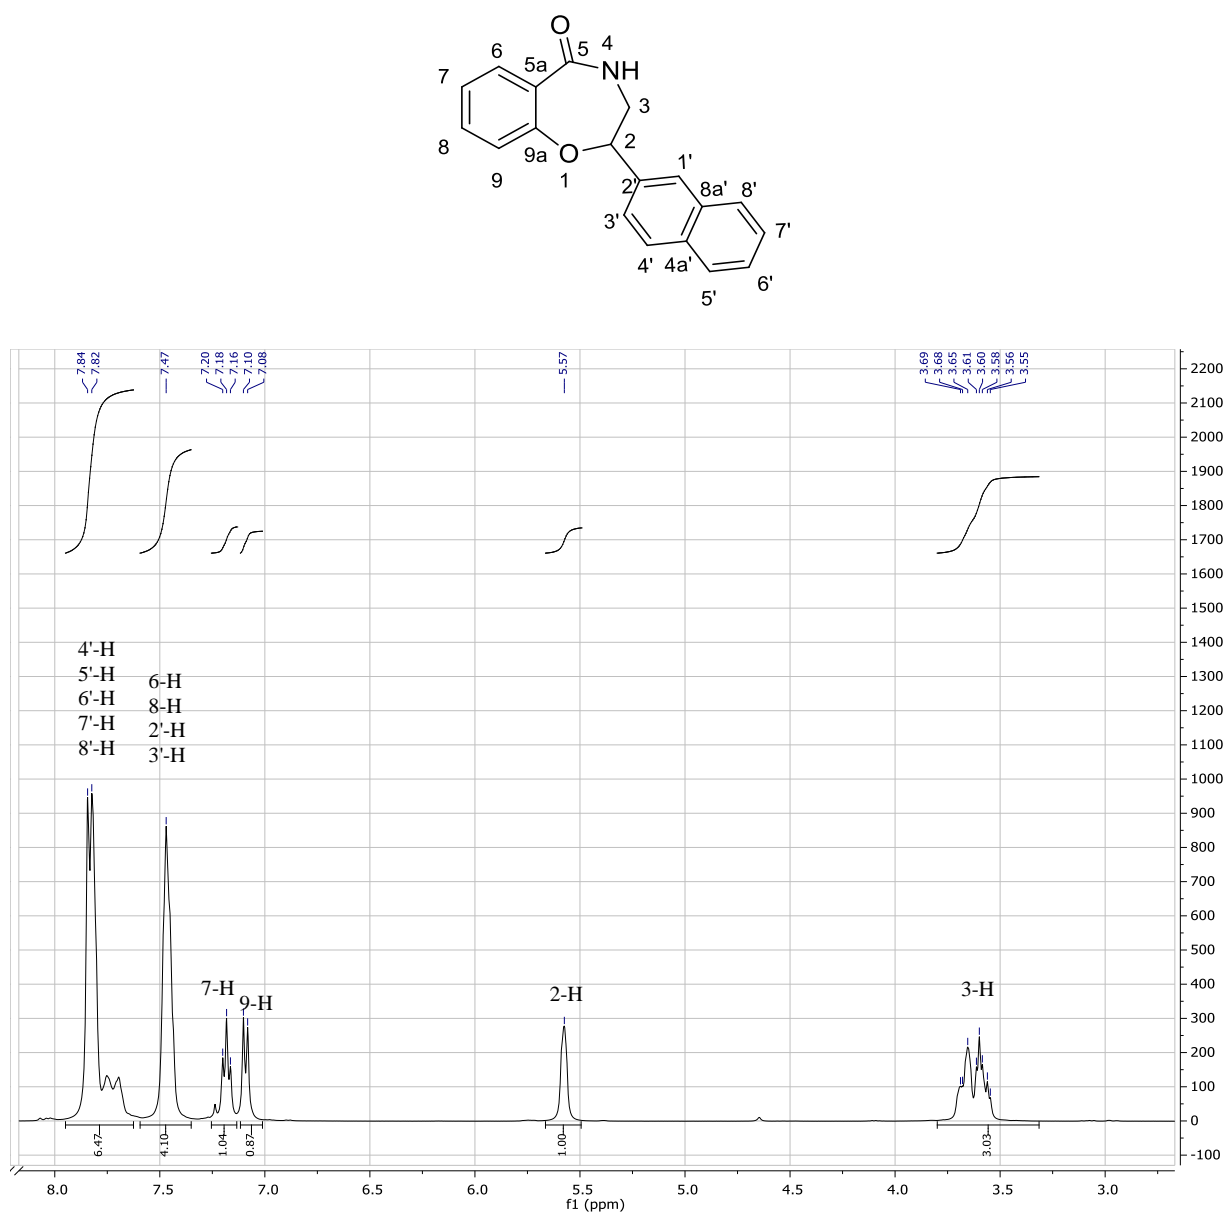

**Figure S29.**  $^1\text{H}$ -NMR spectrum of *rac*-**8c** measured in  $\text{CDCl}_3$  (400 MHz)

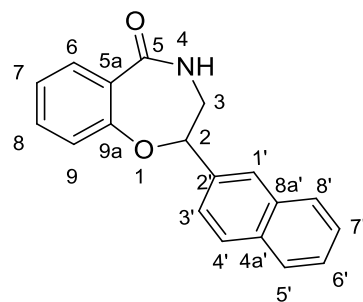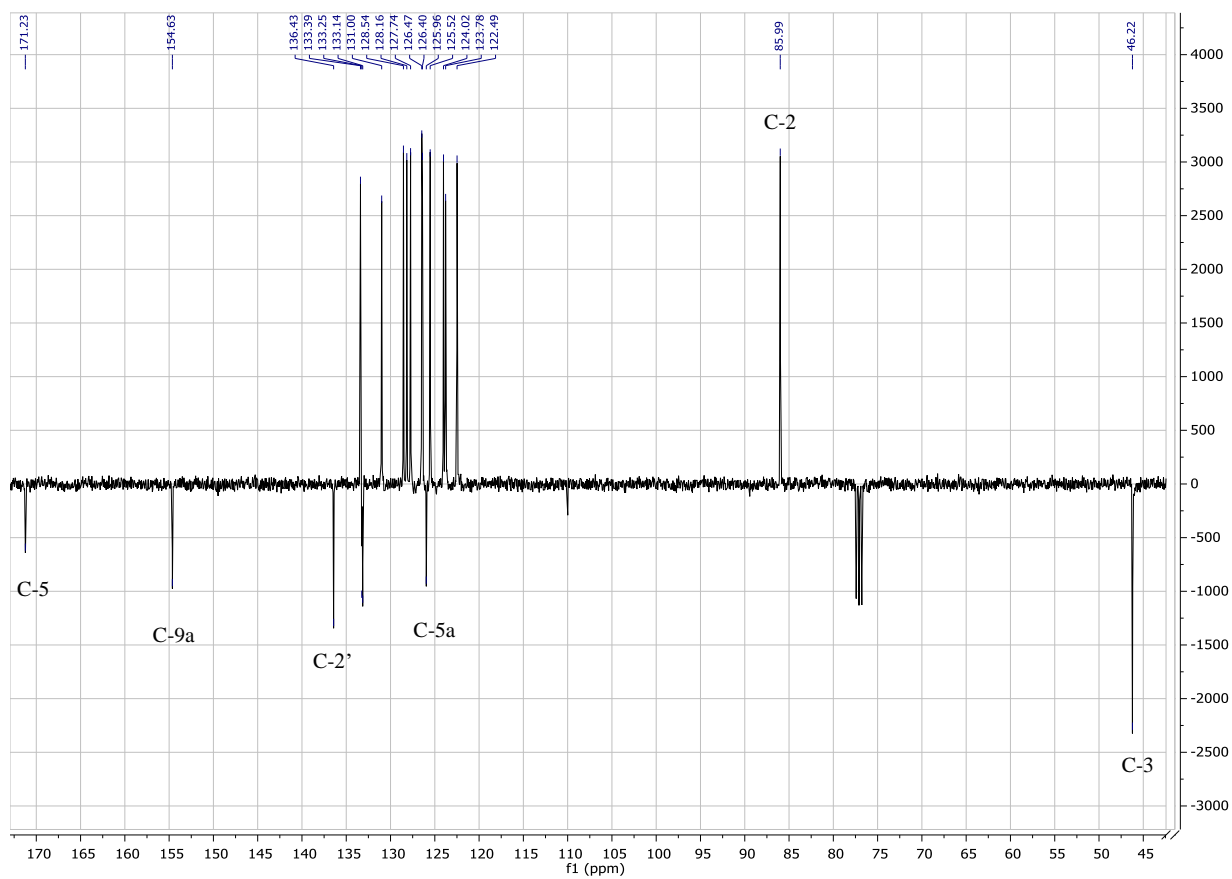

**Figure S30.** J-modulated <sup>13</sup>C-NMR spectrum of *rac*-**8c** measured in CDCl<sub>3</sub> (100 MHz)

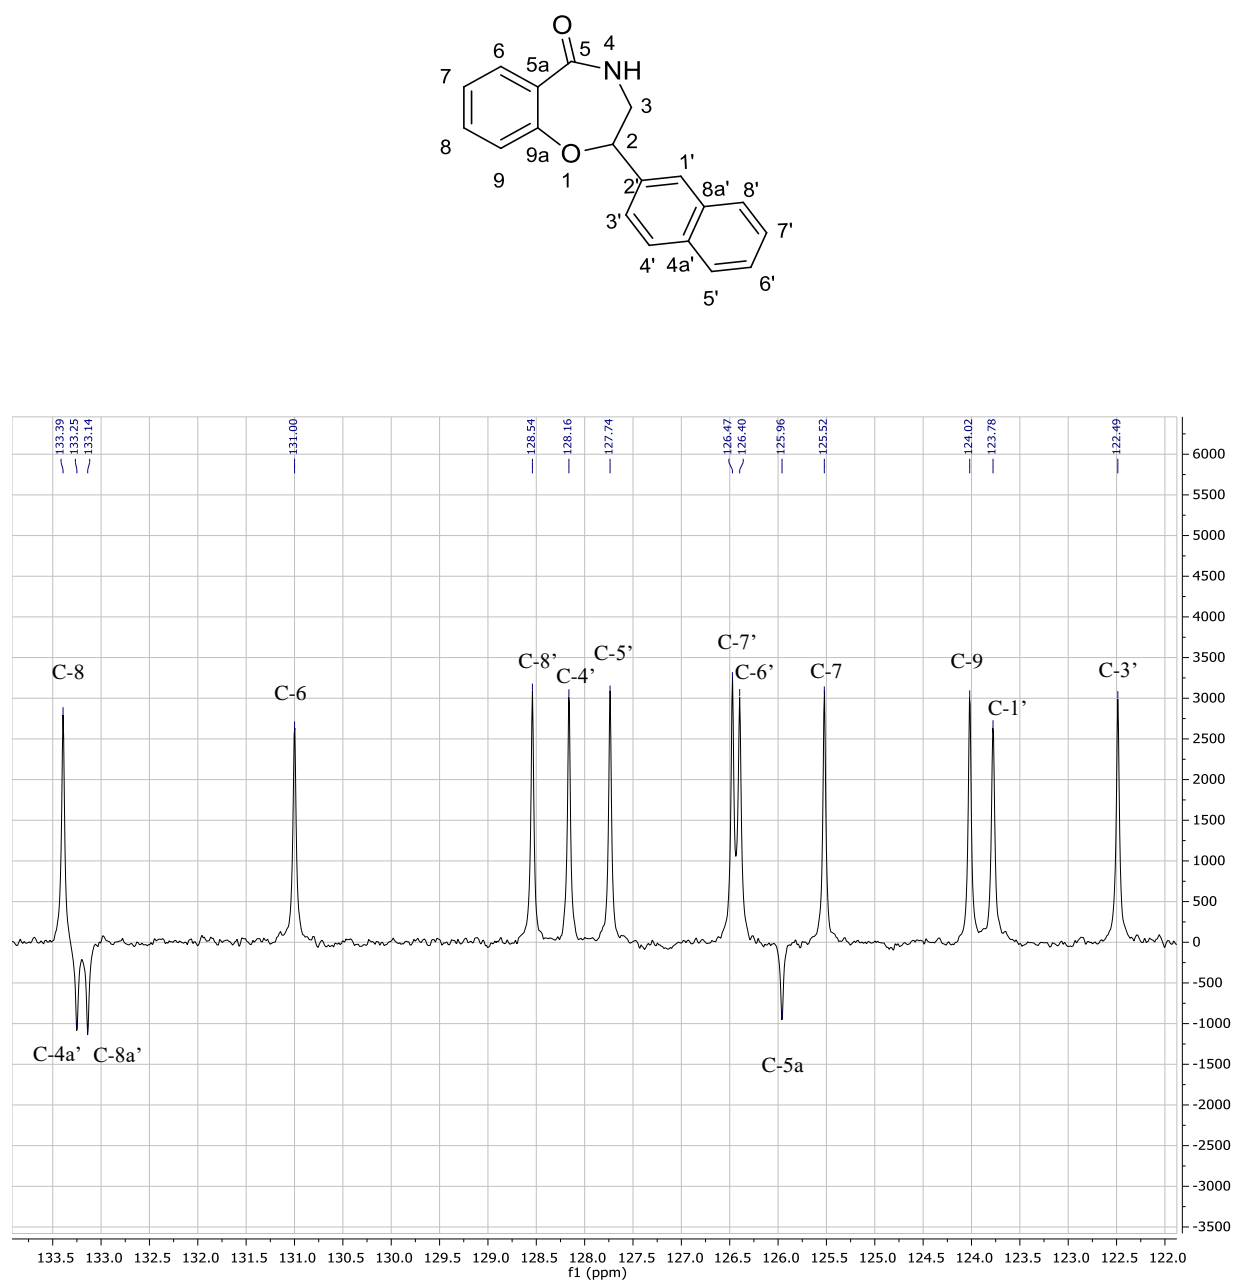

**Figure S31** J-modulated  $^{13}\text{C}$ -NMR spectrum of *rac*-**8c** measured in  $\text{CDCl}_3$  (100 MHz)

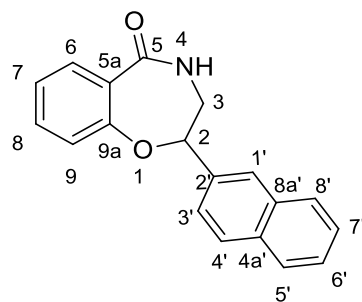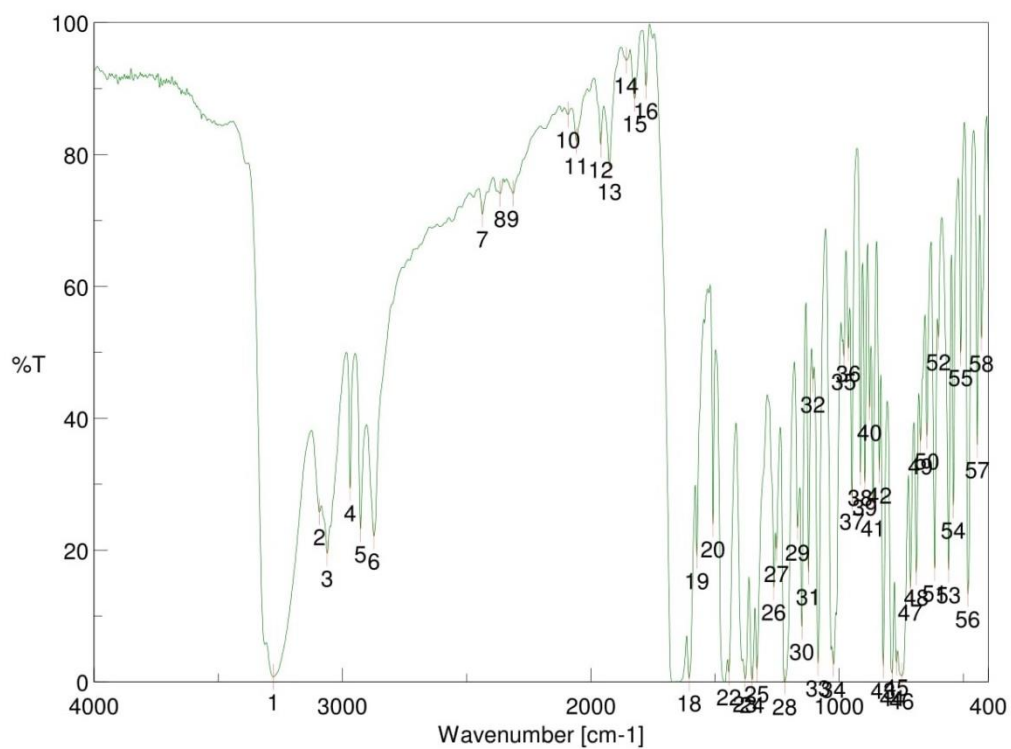

**Figure S32** IR spectrum of *rac*-**8c** recorded as KBr disc

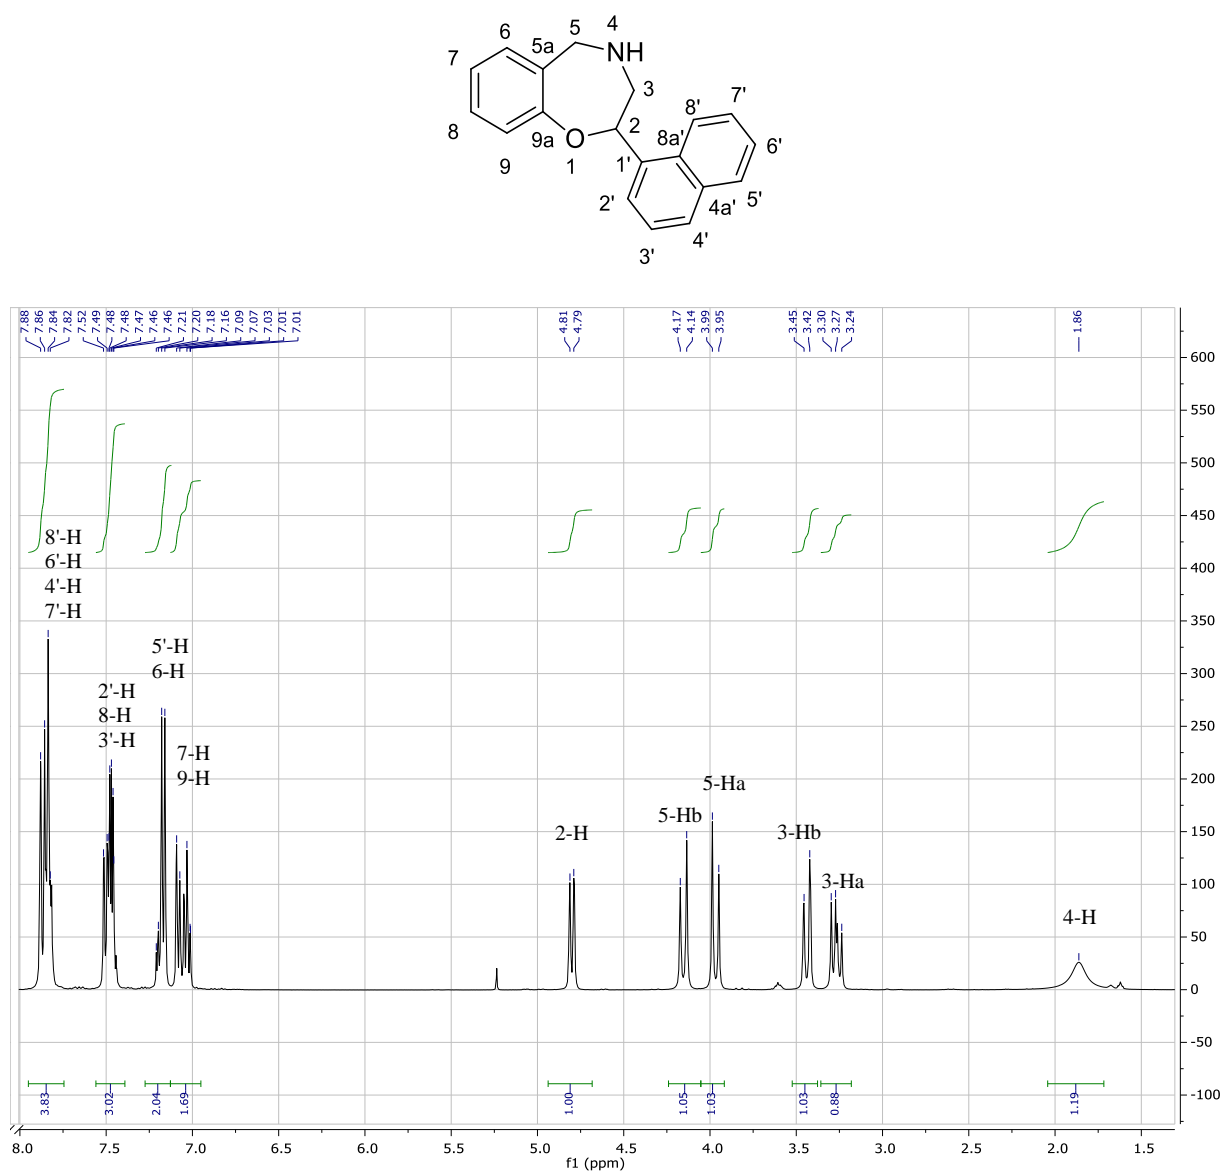

**Figure S33.**  $^1\text{H}$ -NMR spectrum of *rac-9b* measured in  $\text{CDCl}_3$  (400 MHz)

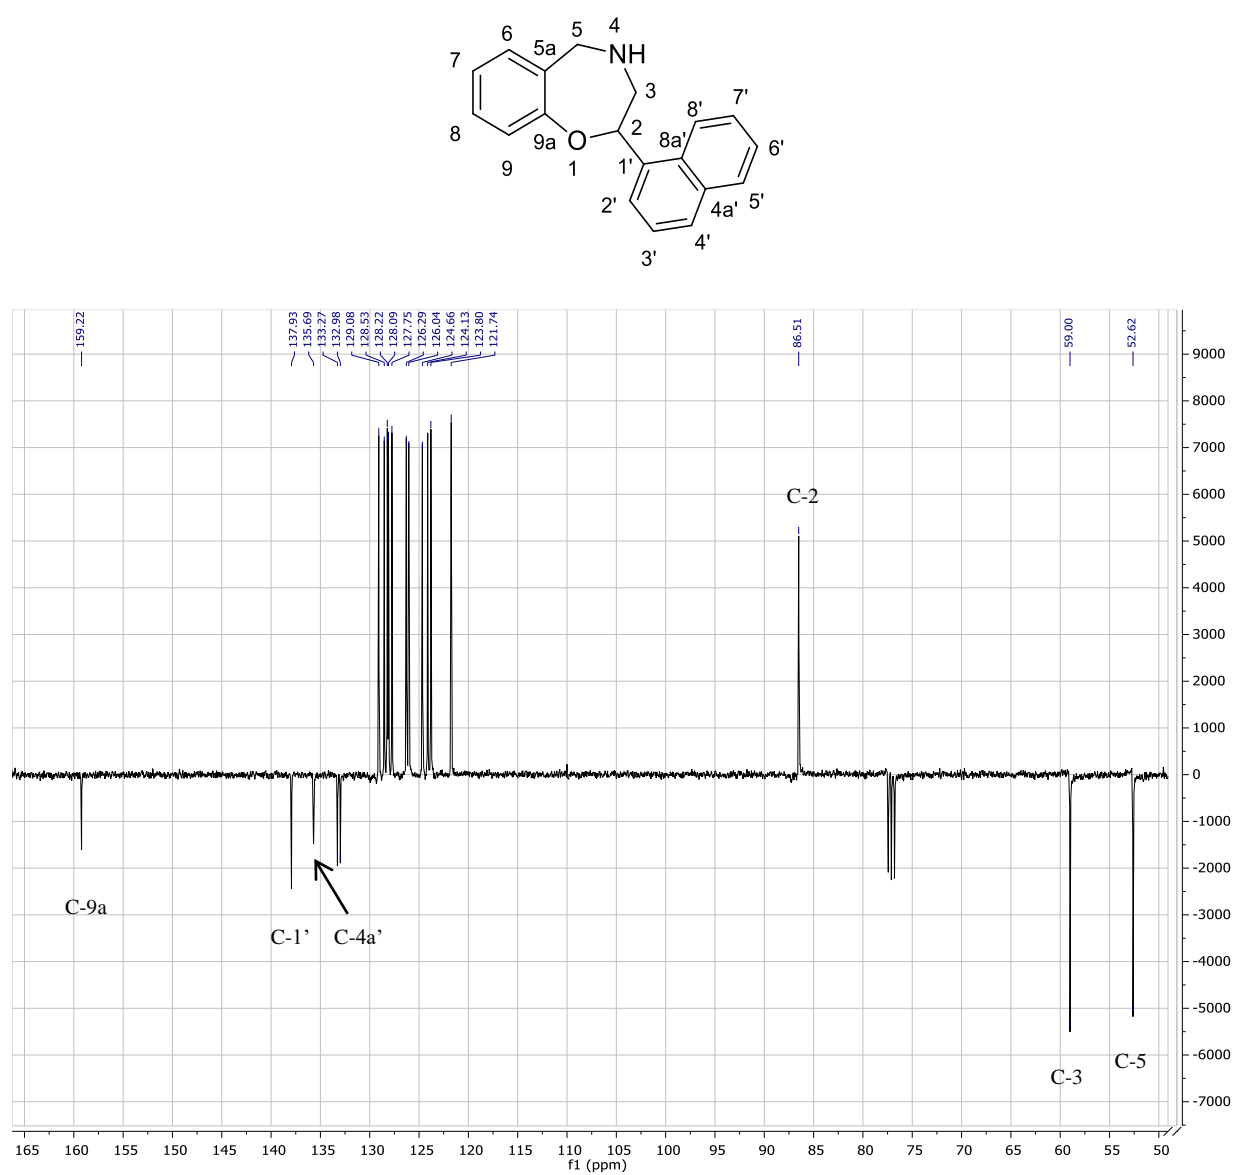

**Figure S34.** J-modulated  $^{13}\text{C}$ -NMR spectrum of *rac-9b* measured in  $\text{CDCl}_3$  (100 MHz)

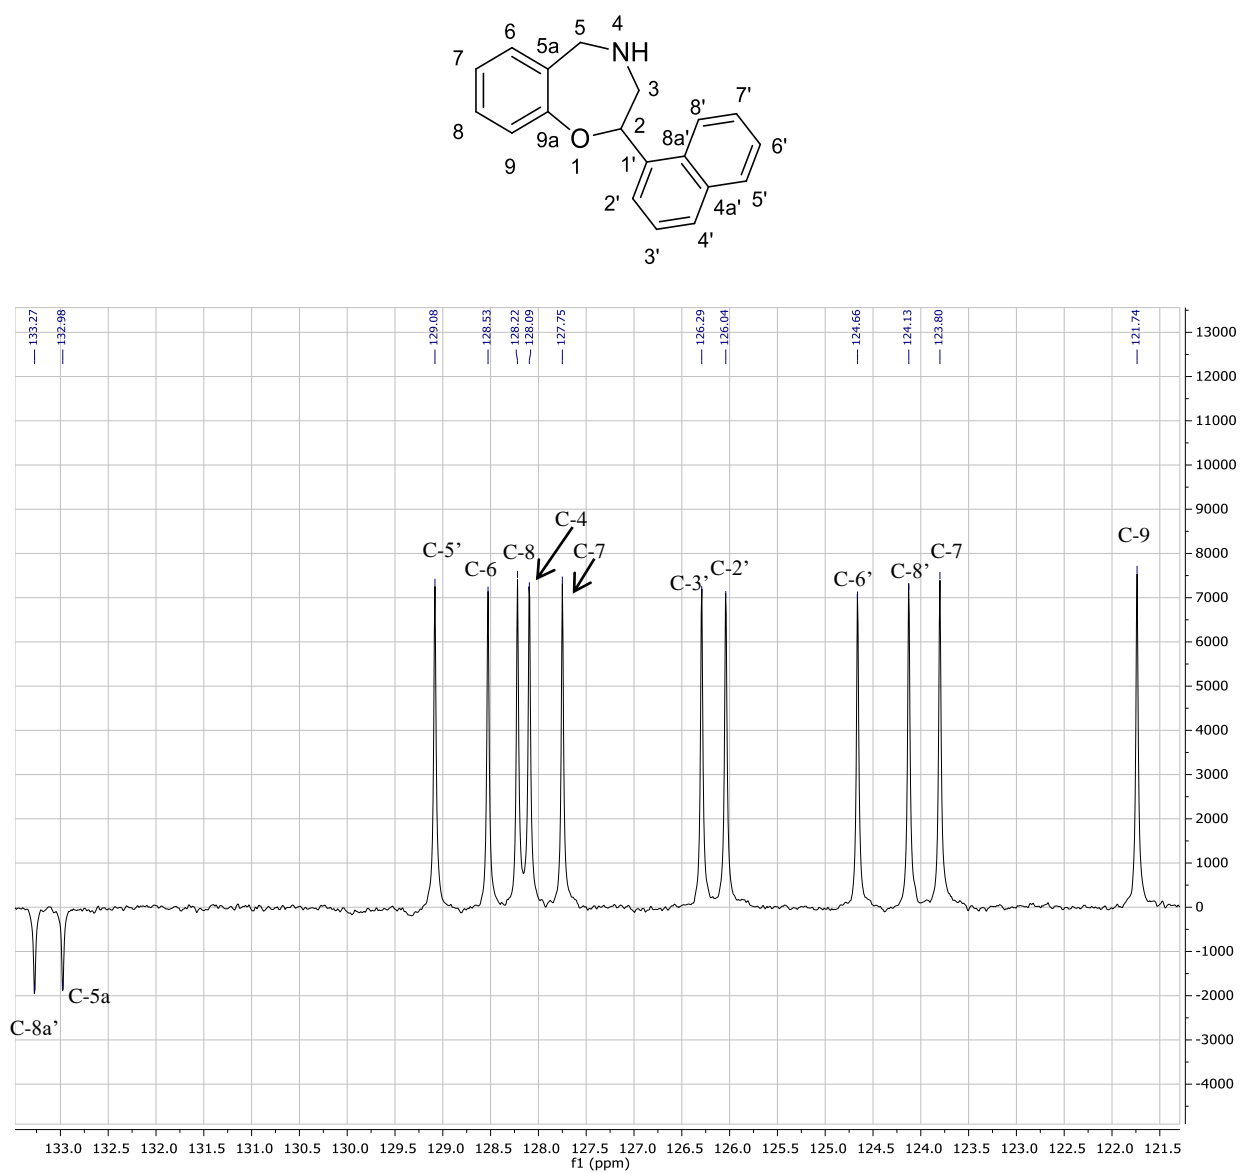

**Figure S35.** J-modulated  $^{13}\text{C}$ -NMR spectrum of *rac-9b* measured in  $\text{CDCl}_3$  (100 MHz)

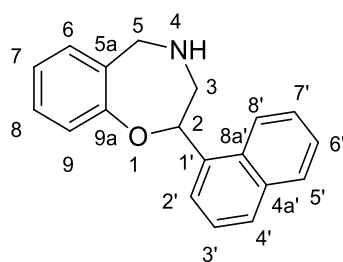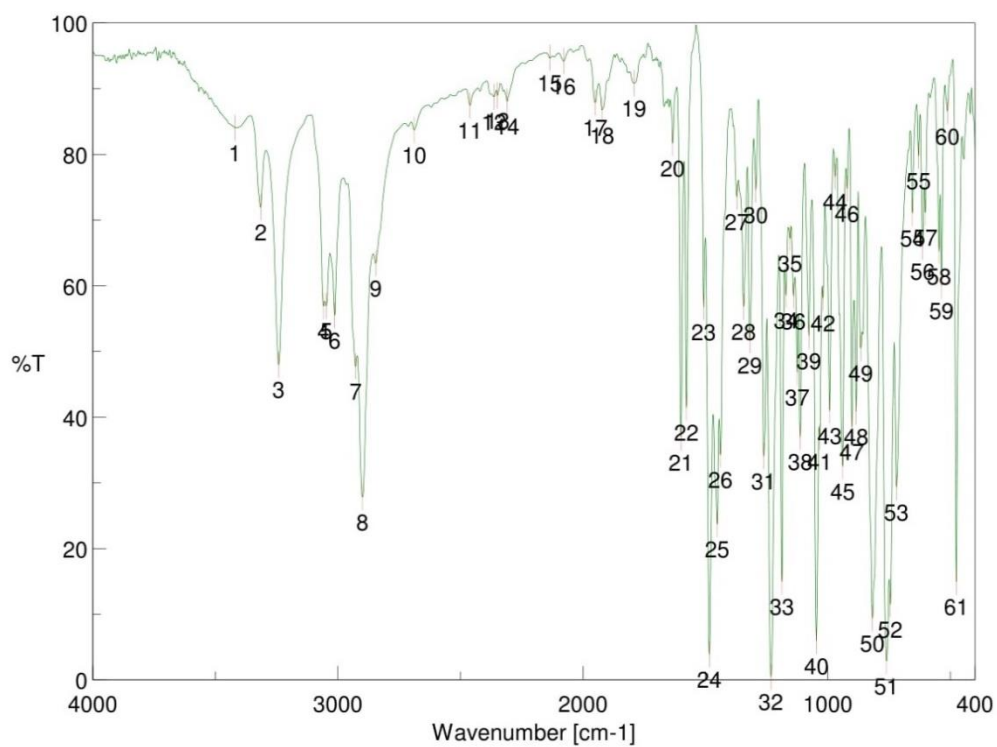

**Figure S36.** IR spectrum of *rac-9b* recorded as KBr disc

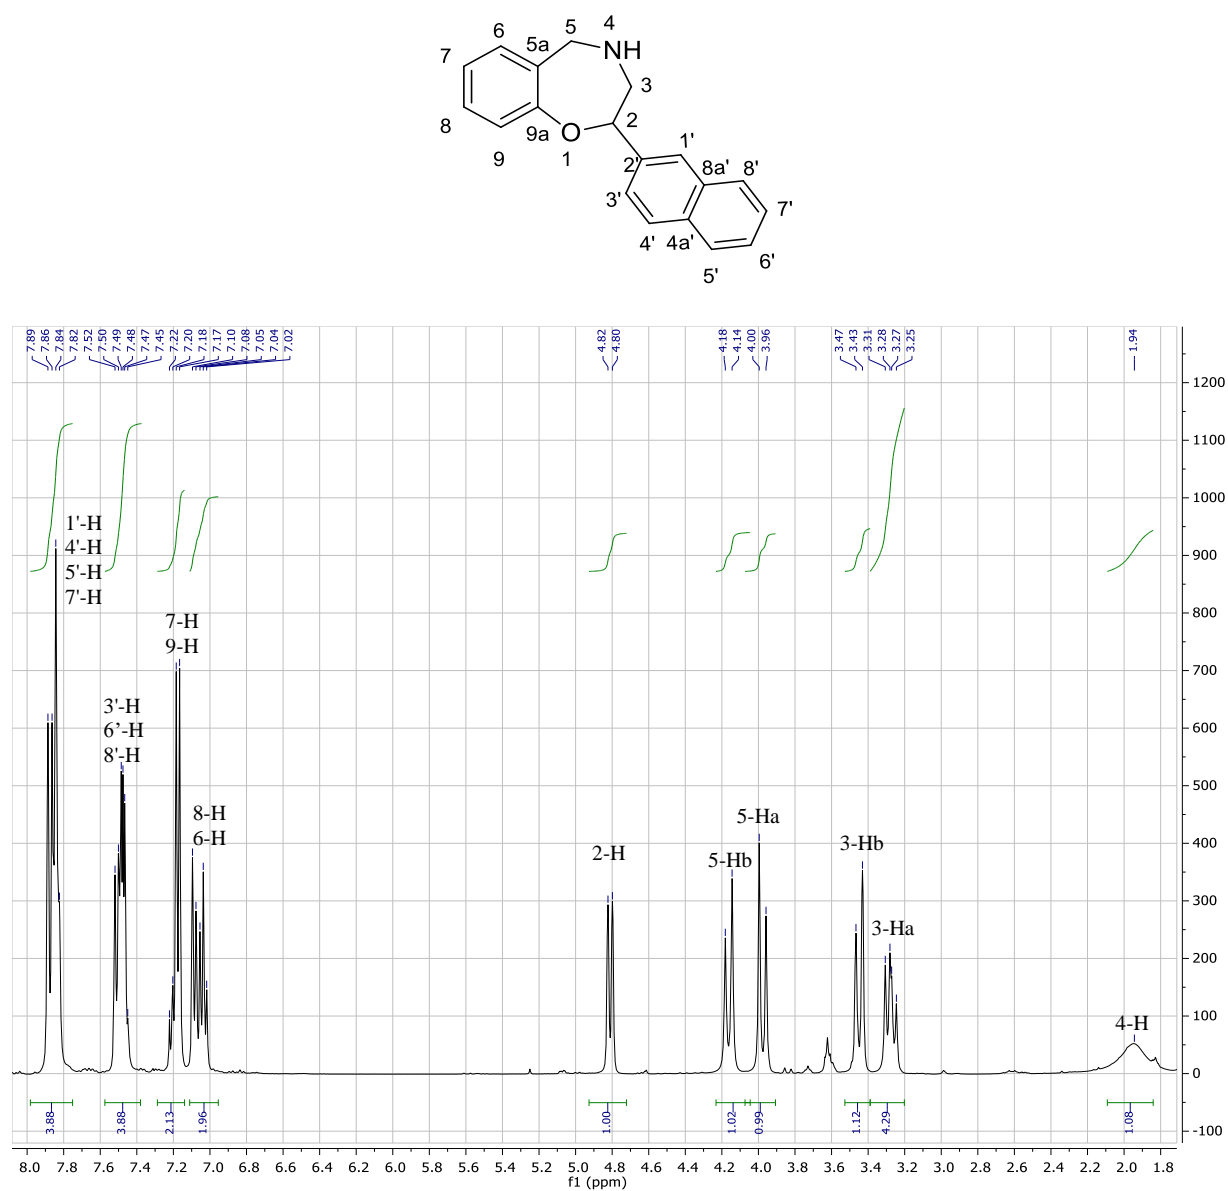

**Figure S37.**  $^1\text{H}$ -NMR spectrum of *rac*-**9c** measured in  $\text{CDCl}_3$  (400 MHz)

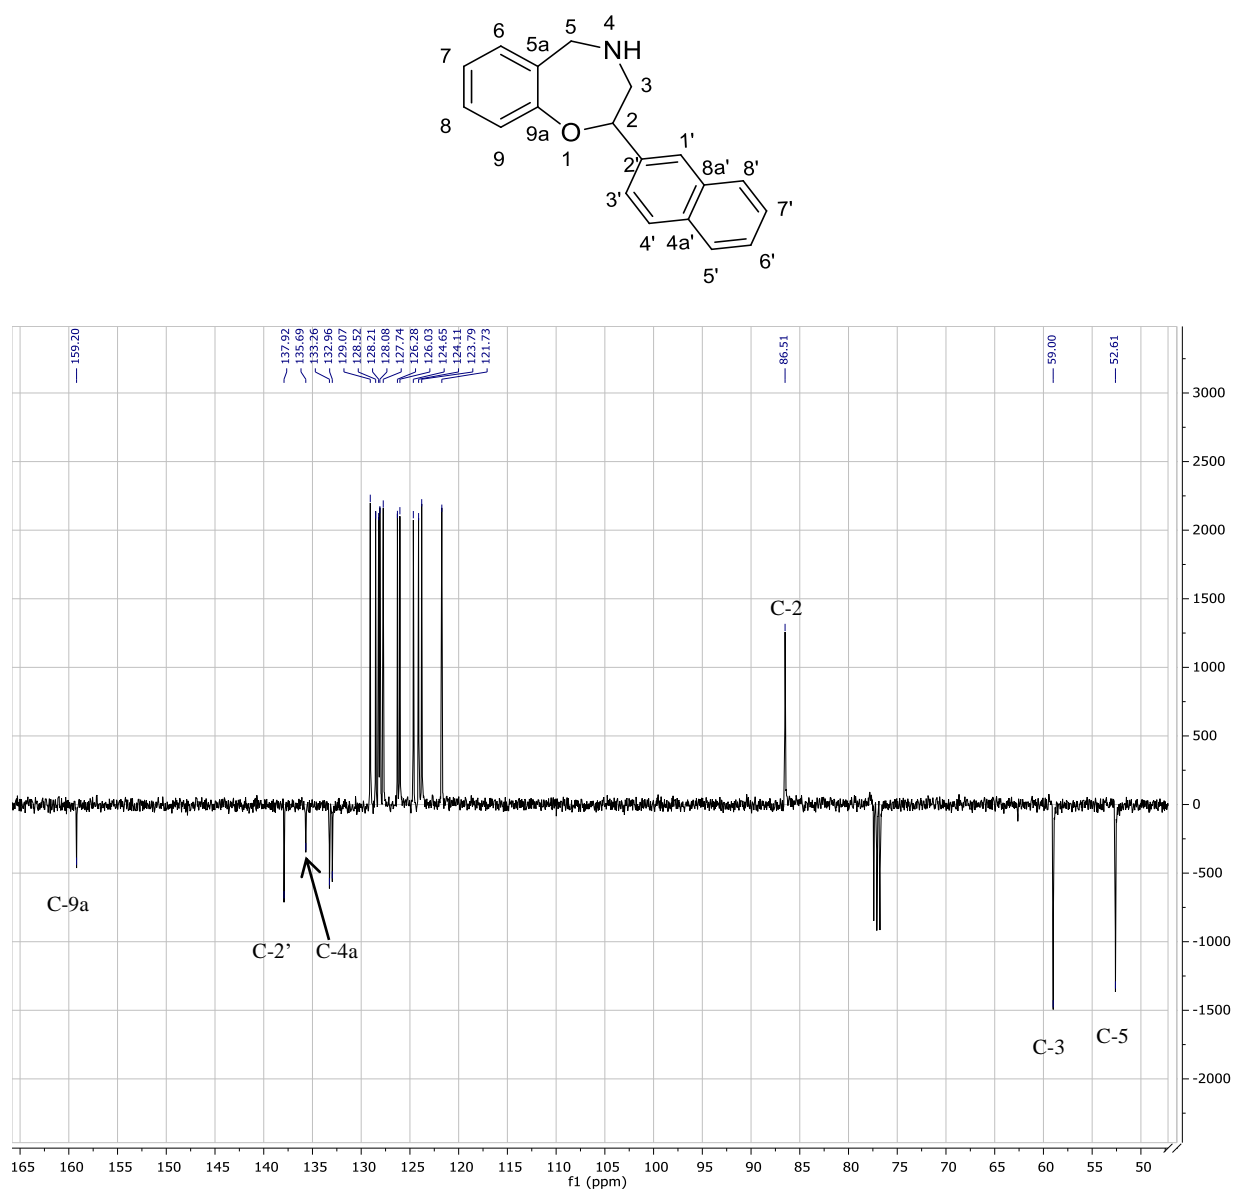

**Figure S38.** J-modulated  $^{13}\text{C}$ -NMR spectrum of *rac-9c* measured in  $\text{CDCl}_3$  (100 MHz)

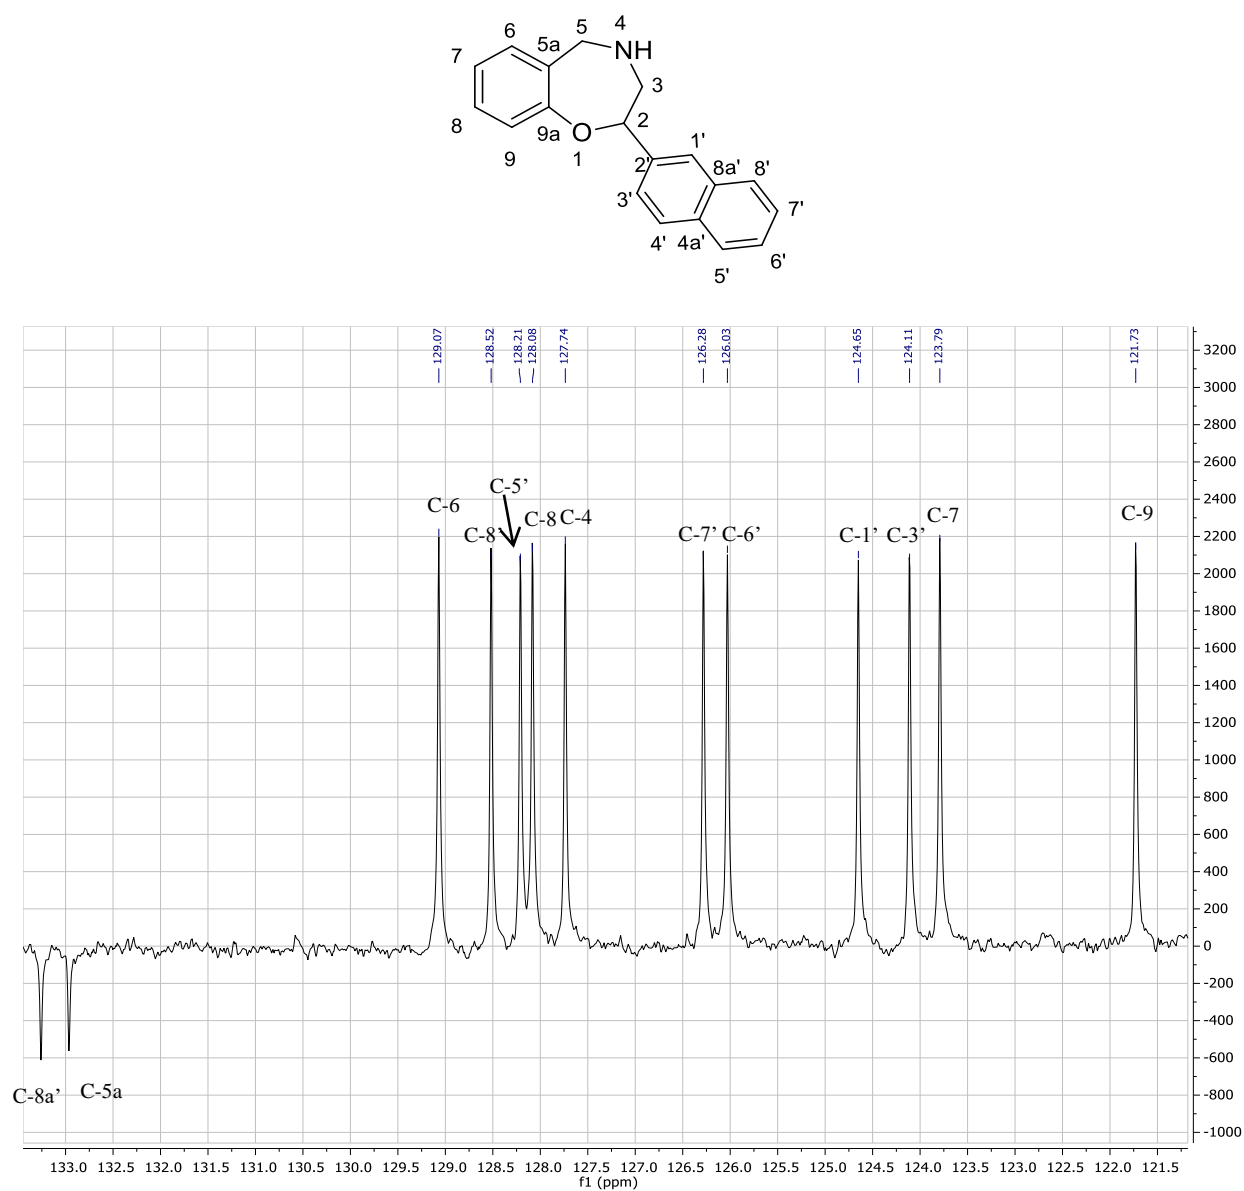

**Figure S39.** J-modulated <sup>13</sup>C-NMR spectrum of *rac-9c* measured in CDCl<sub>3</sub> (100 MHz)

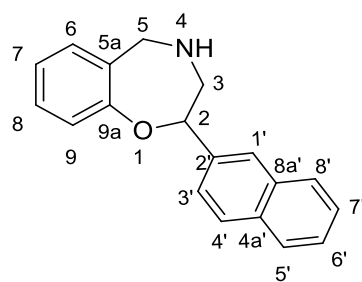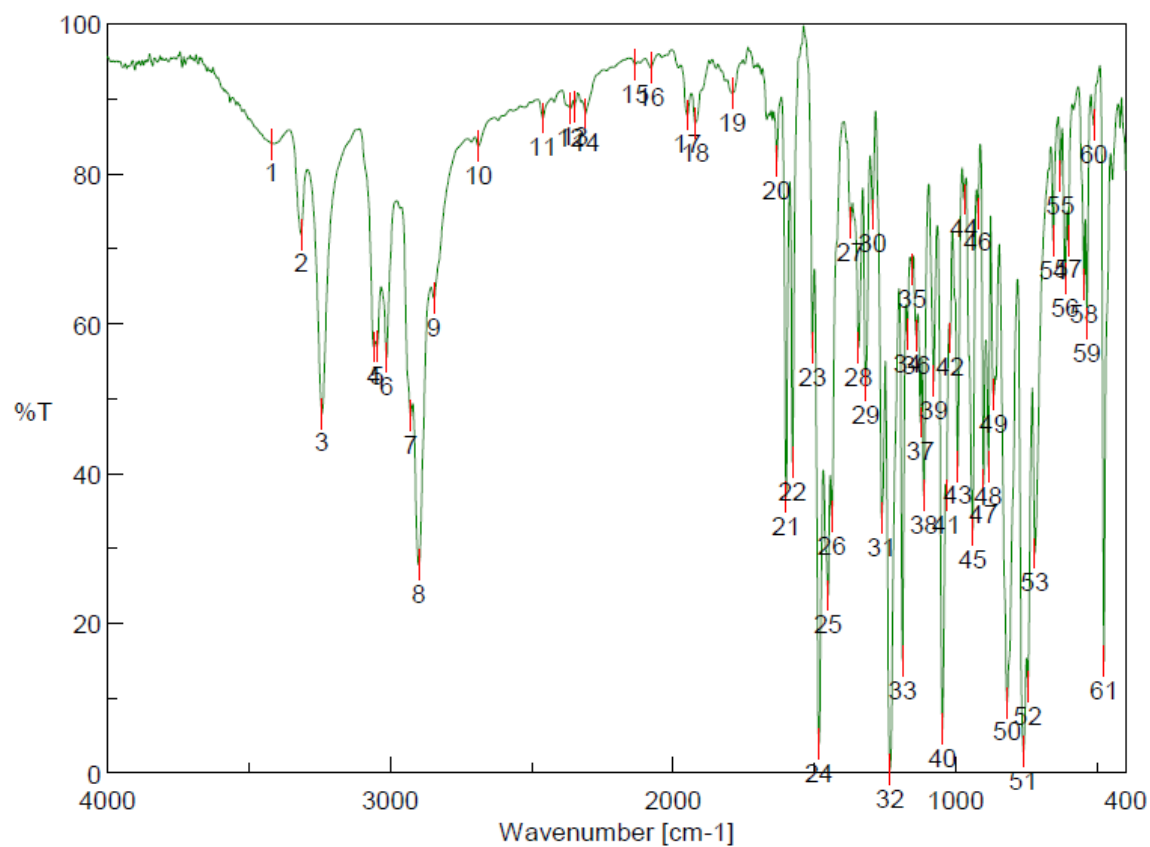

**Figure S40.** IR spectrum of *rac*-9c recorded as KBr disc

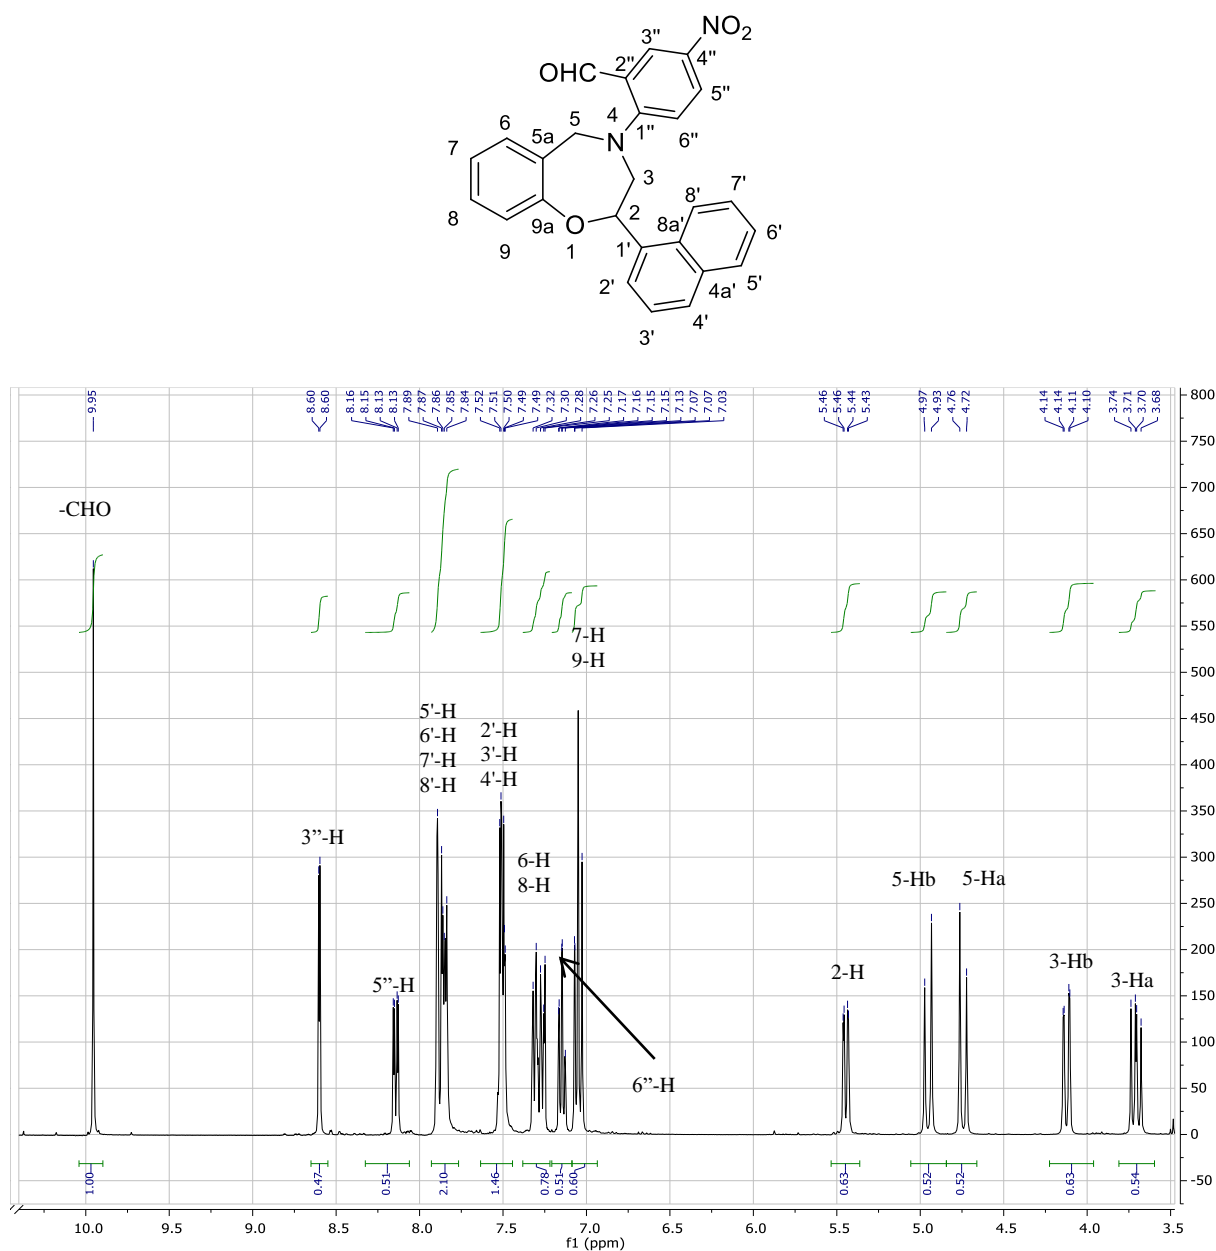

**Figure S41.**  $^1\text{H}$ -NMR spectrum of *rac*-**1b** measured in  $\text{CDCl}_3$  (400 MHz)

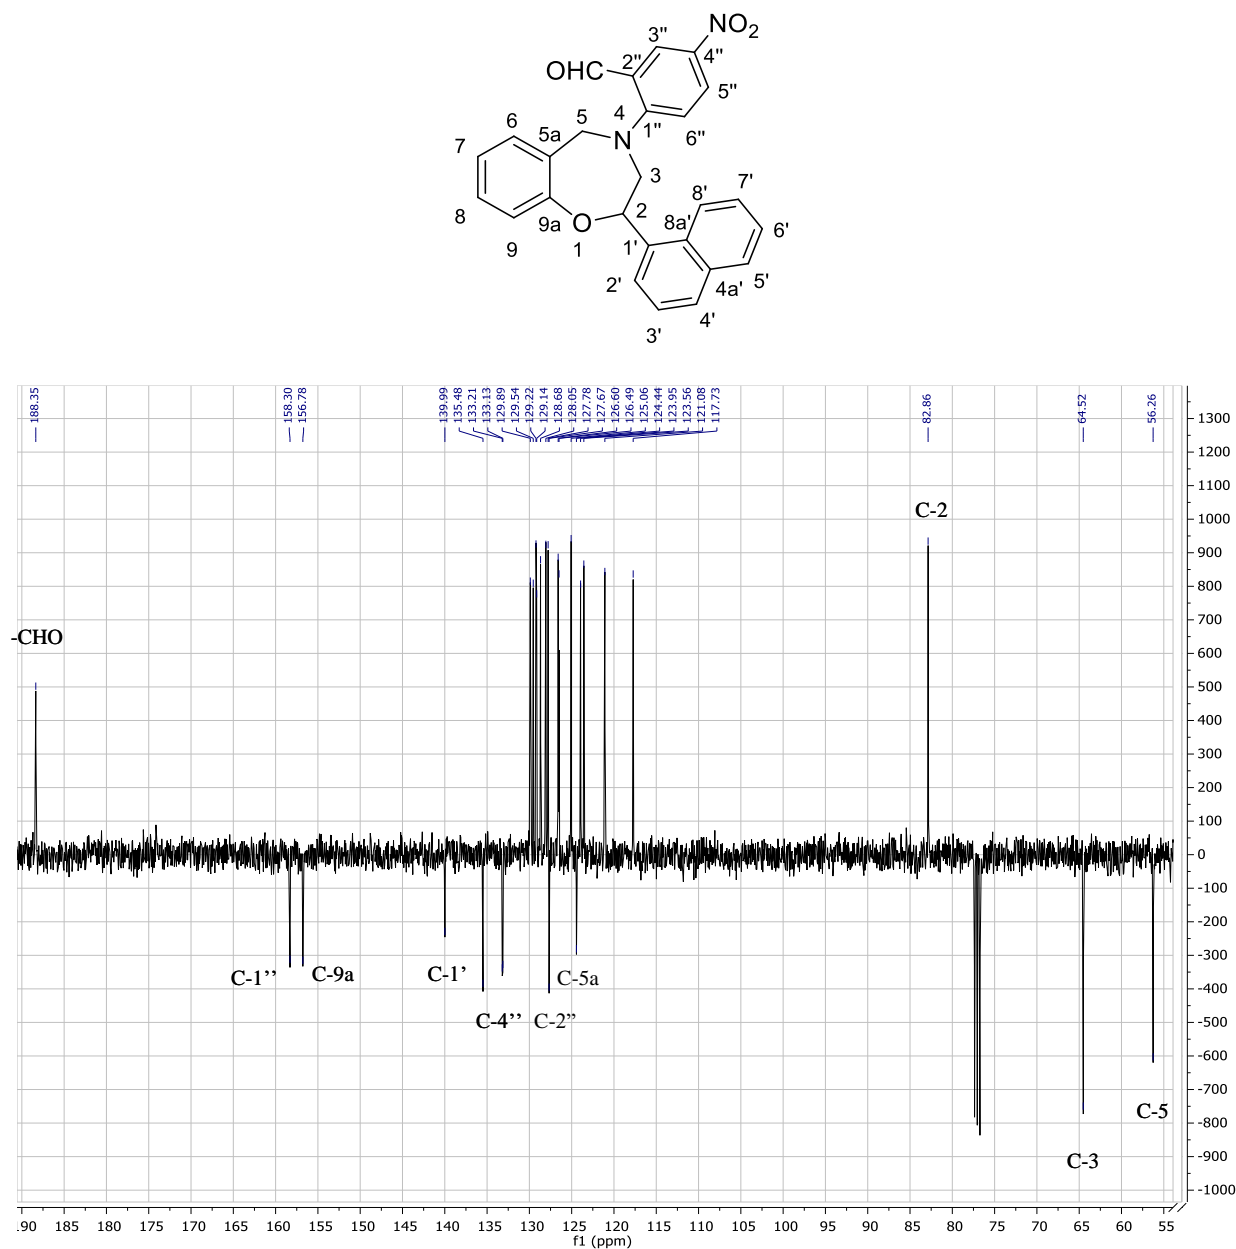

**Figure S42.** J-modulated <sup>13</sup>C-NMR spectrum of *rac-1b* measured in CDCl<sub>3</sub> (100 MHz)

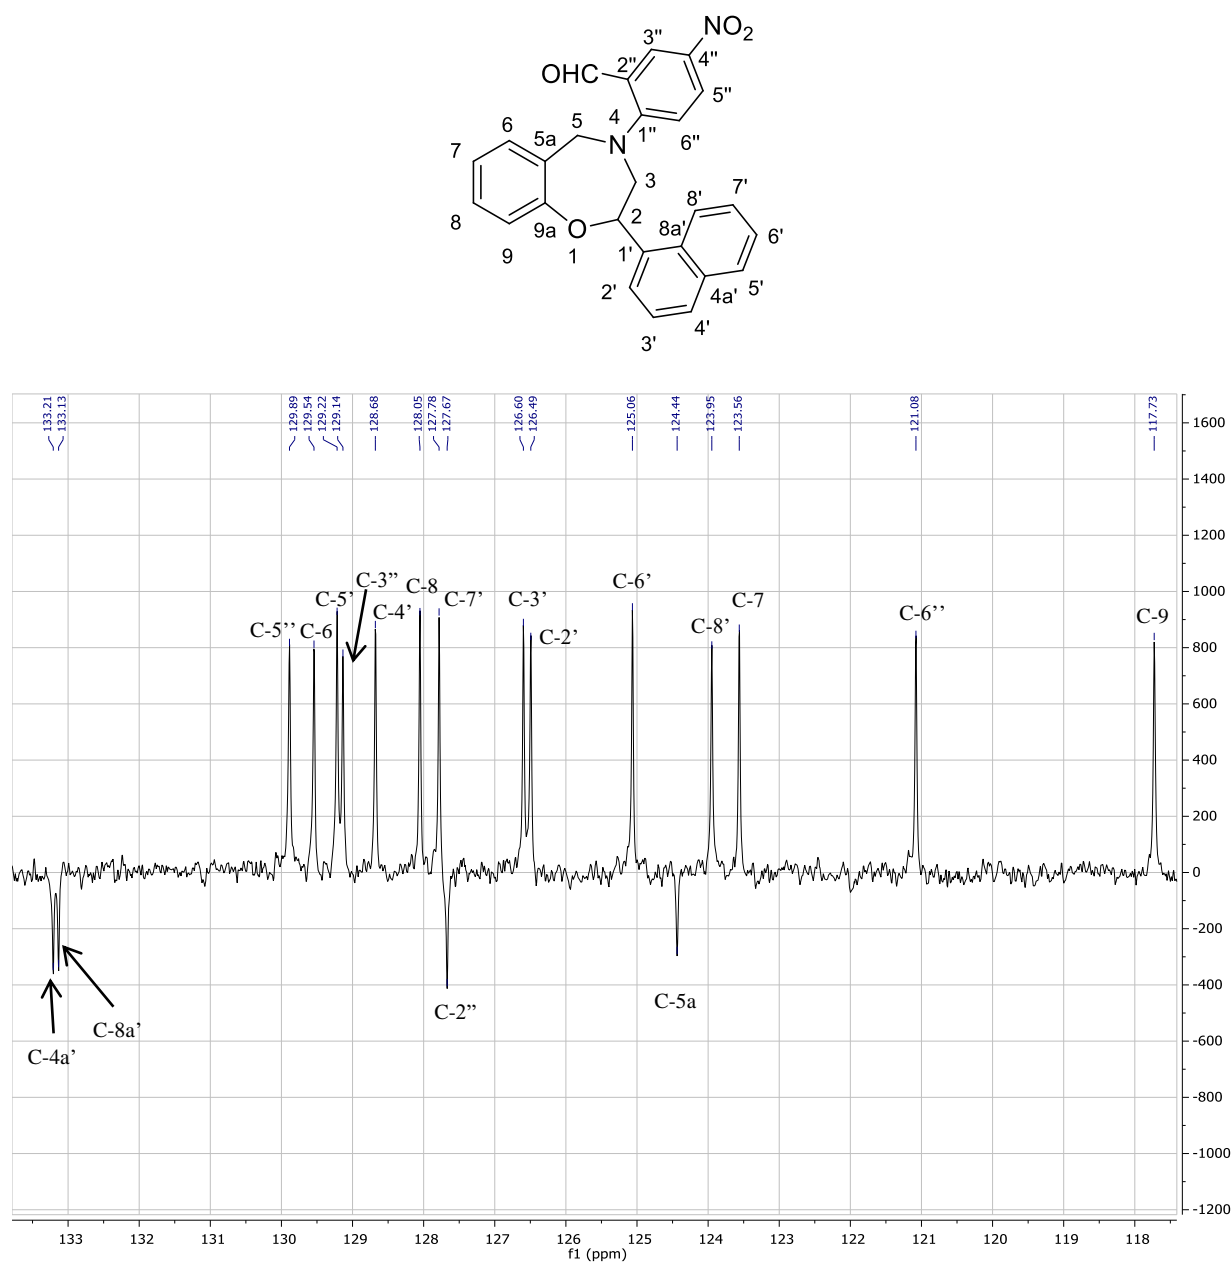

**Figure S43.** J-modulated <sup>13</sup>C-NMR spectrum of *rac-1b* measured in CDCl<sub>3</sub> (100 MHz)

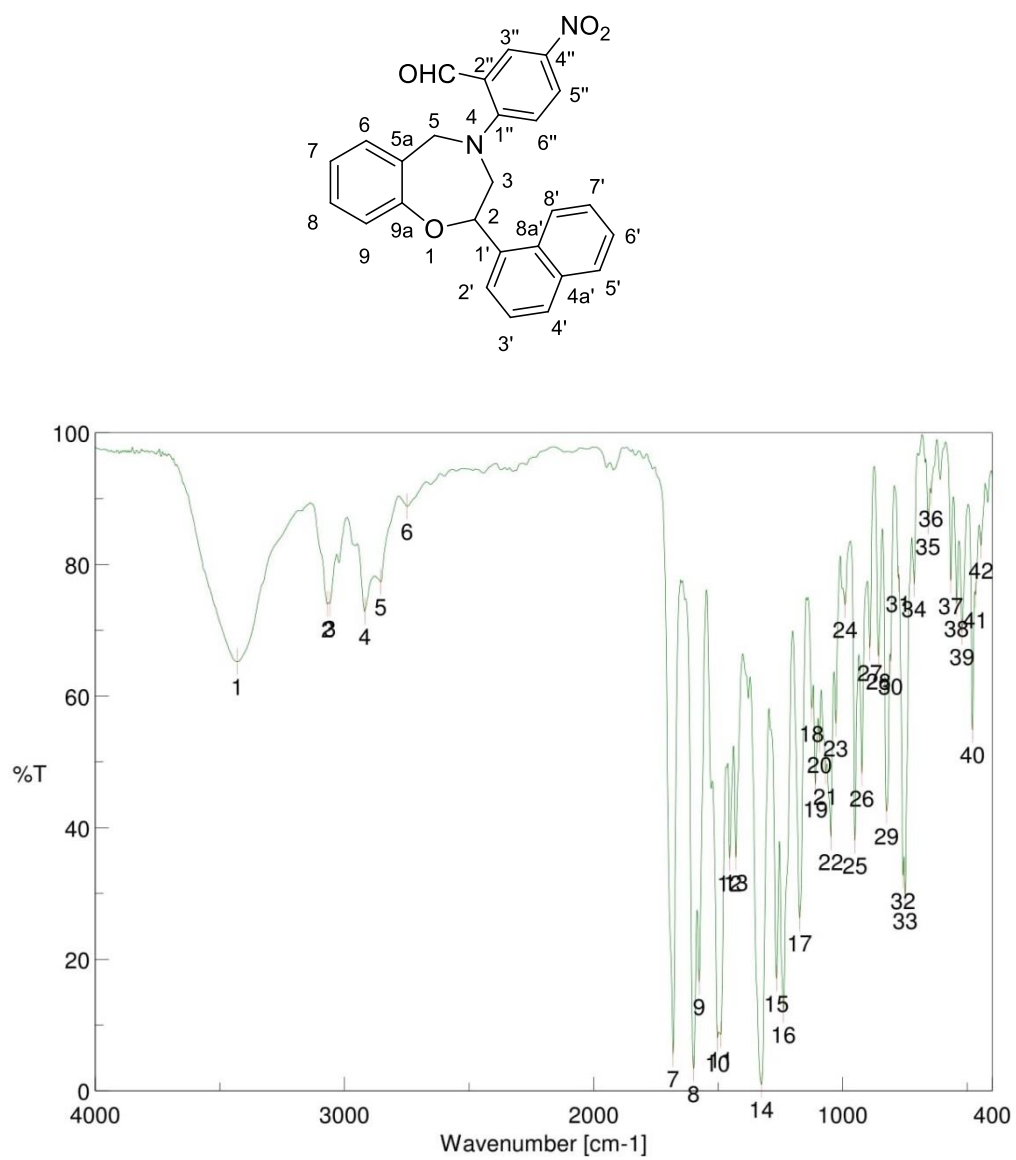

**Figure S44.** IR spectrum of *rac*-**1b** recorded as KBr disc

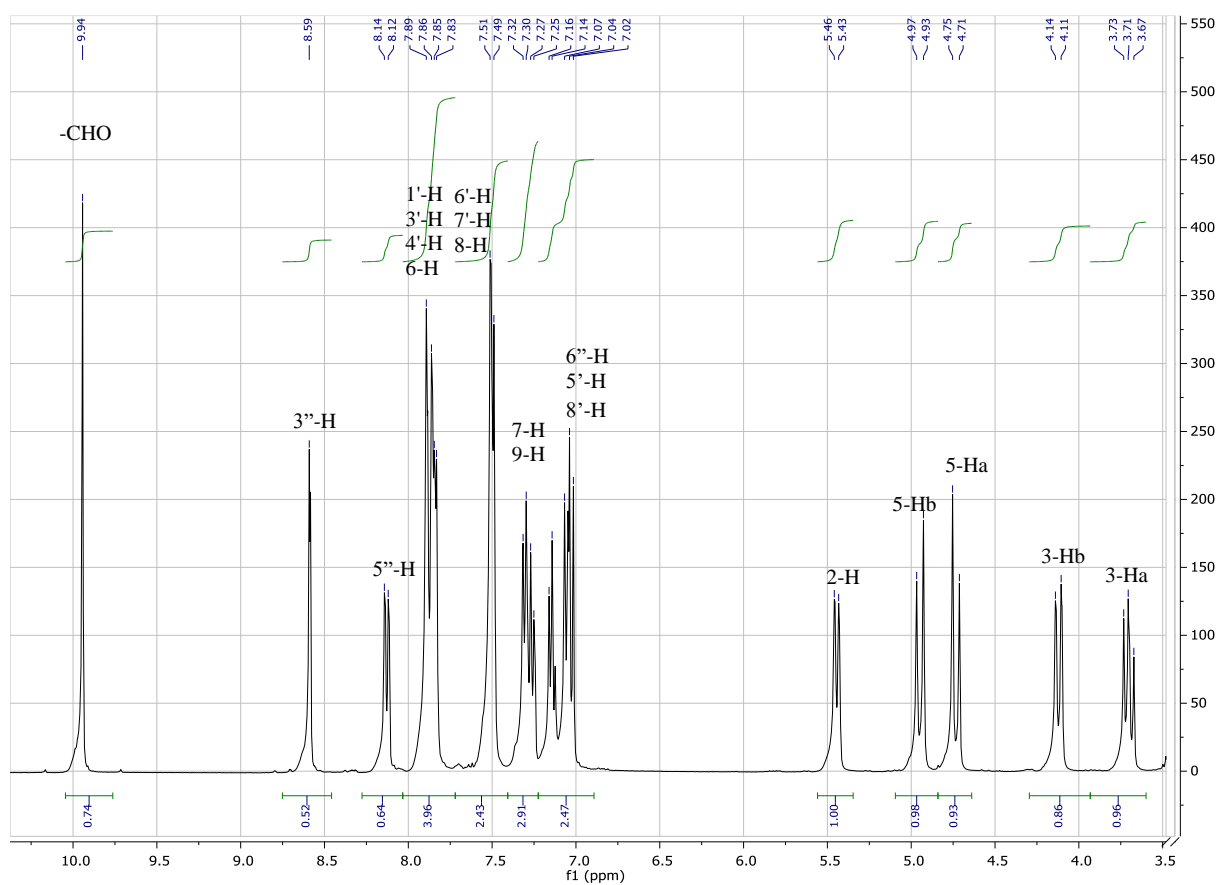

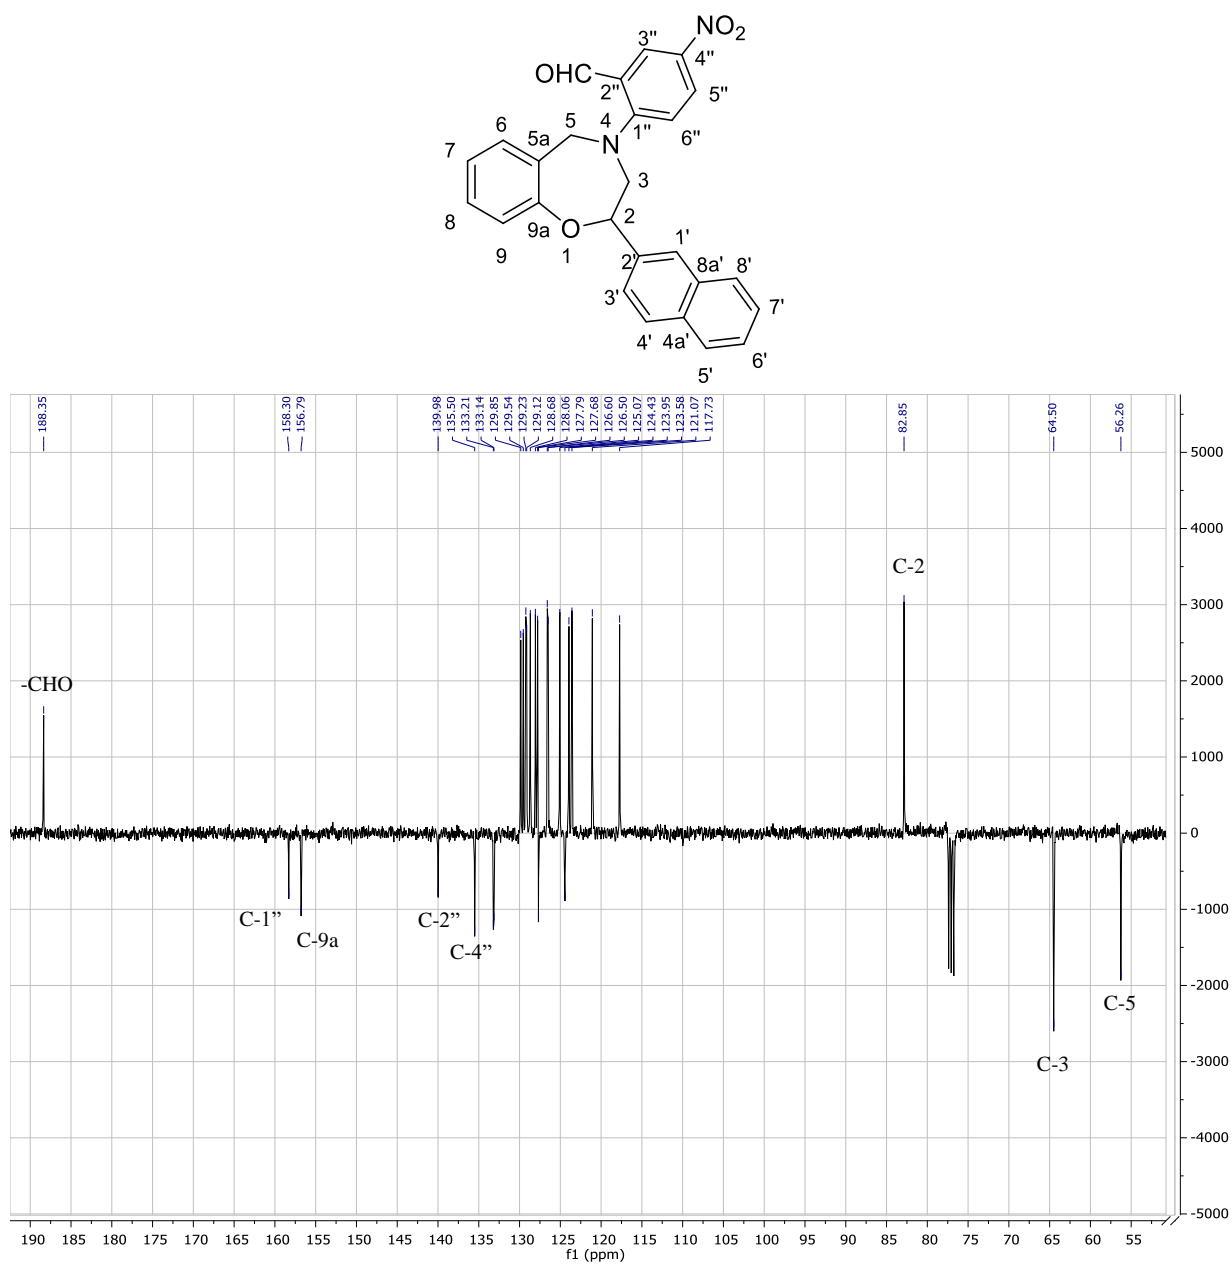

**Figure S46.** J-modulated <sup>13</sup>C-NMR spectrum of *rac-1c* measured in CDCl<sub>3</sub> (100 MHz)

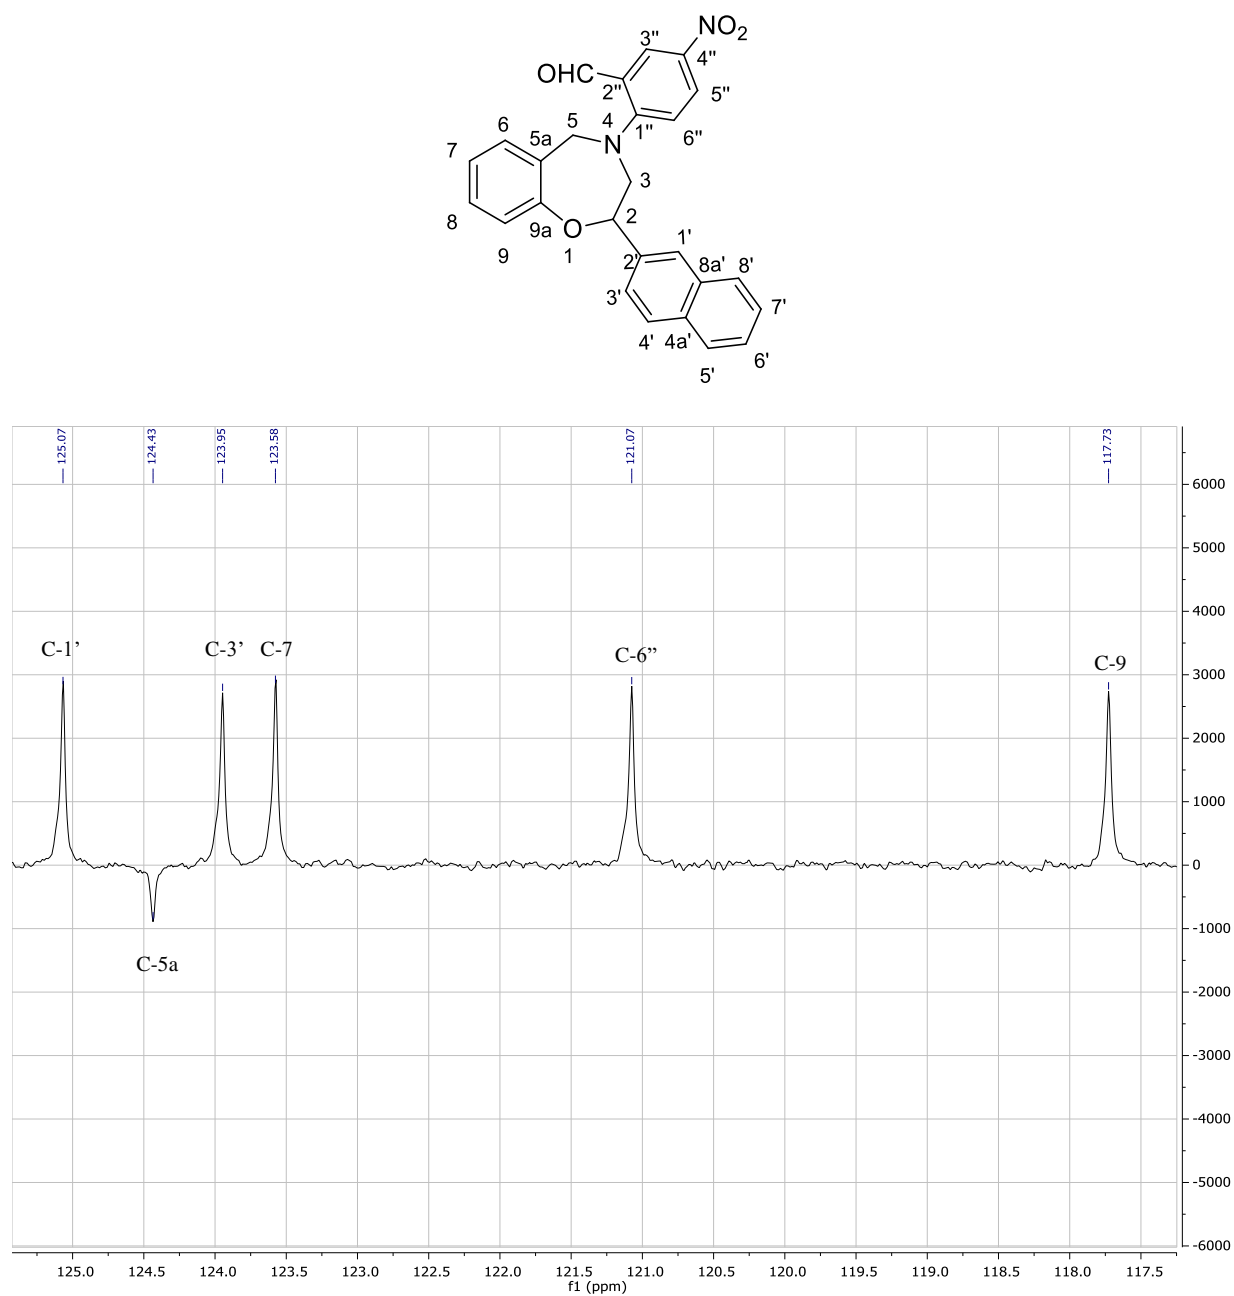

**Figure S47.** J-modulated  $^{13}\text{C}$ -NMR spectrum of *rac-1c* measured in  $\text{CDCl}_3$  (100 MHz)

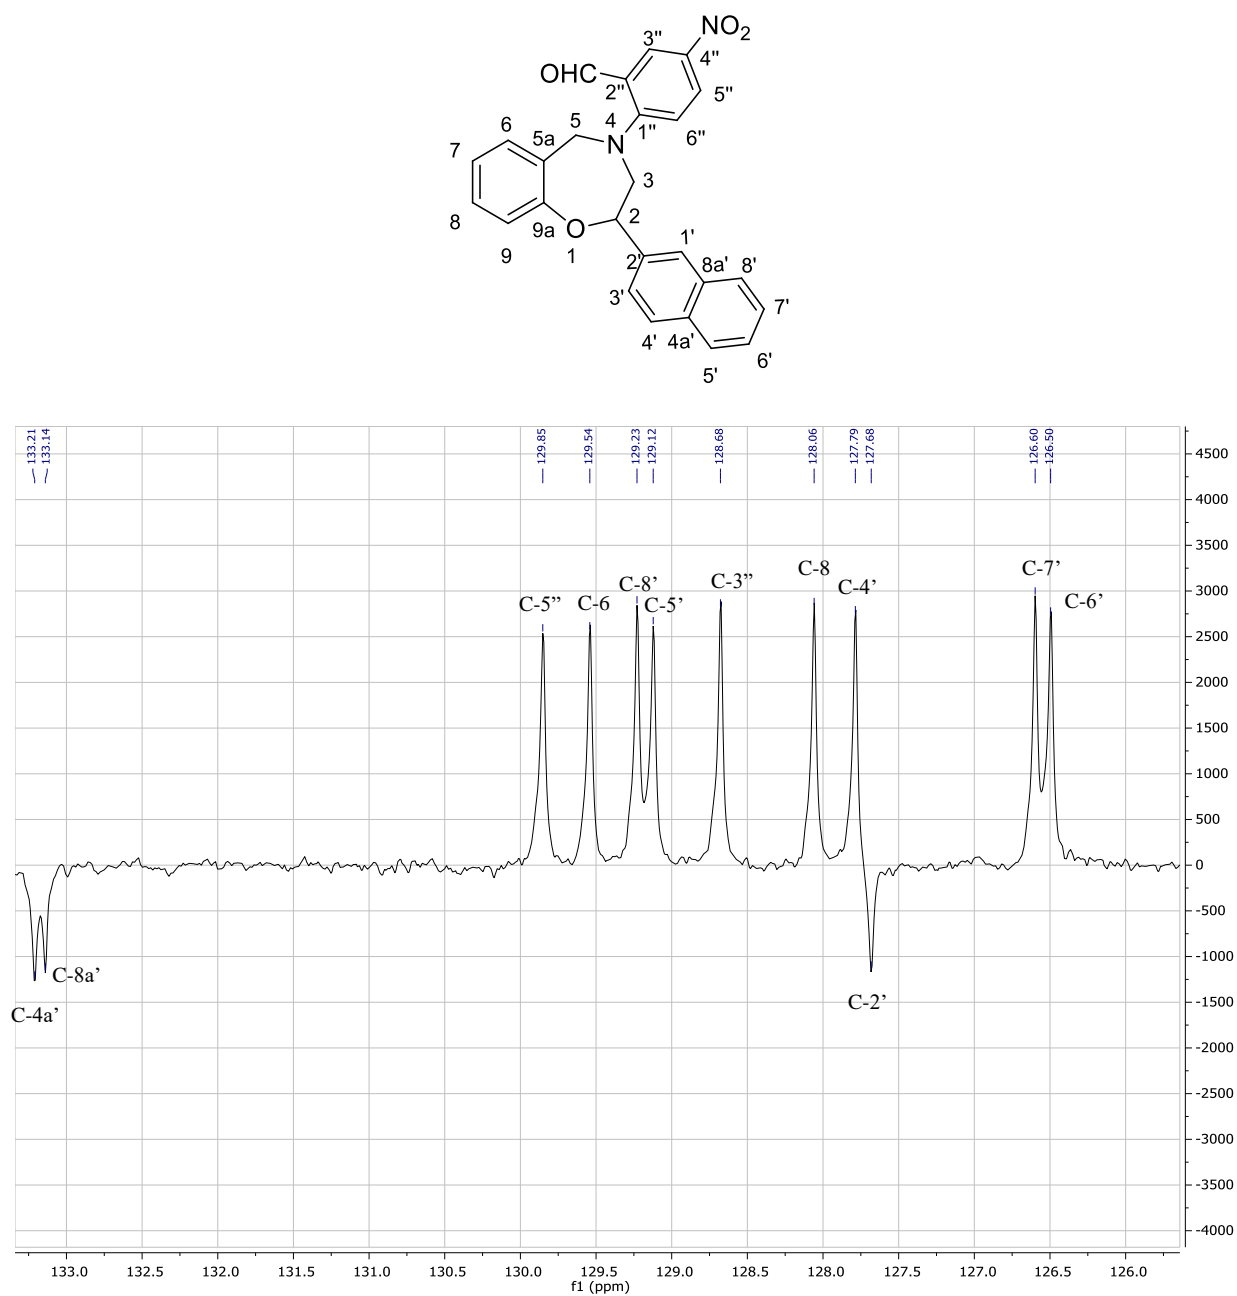

**Figure S48.** J-modulated  $^{13}\text{C}$ -NMR spectrum of *rac-1c* measured in  $\text{CDCl}_3$  (100 MHz)

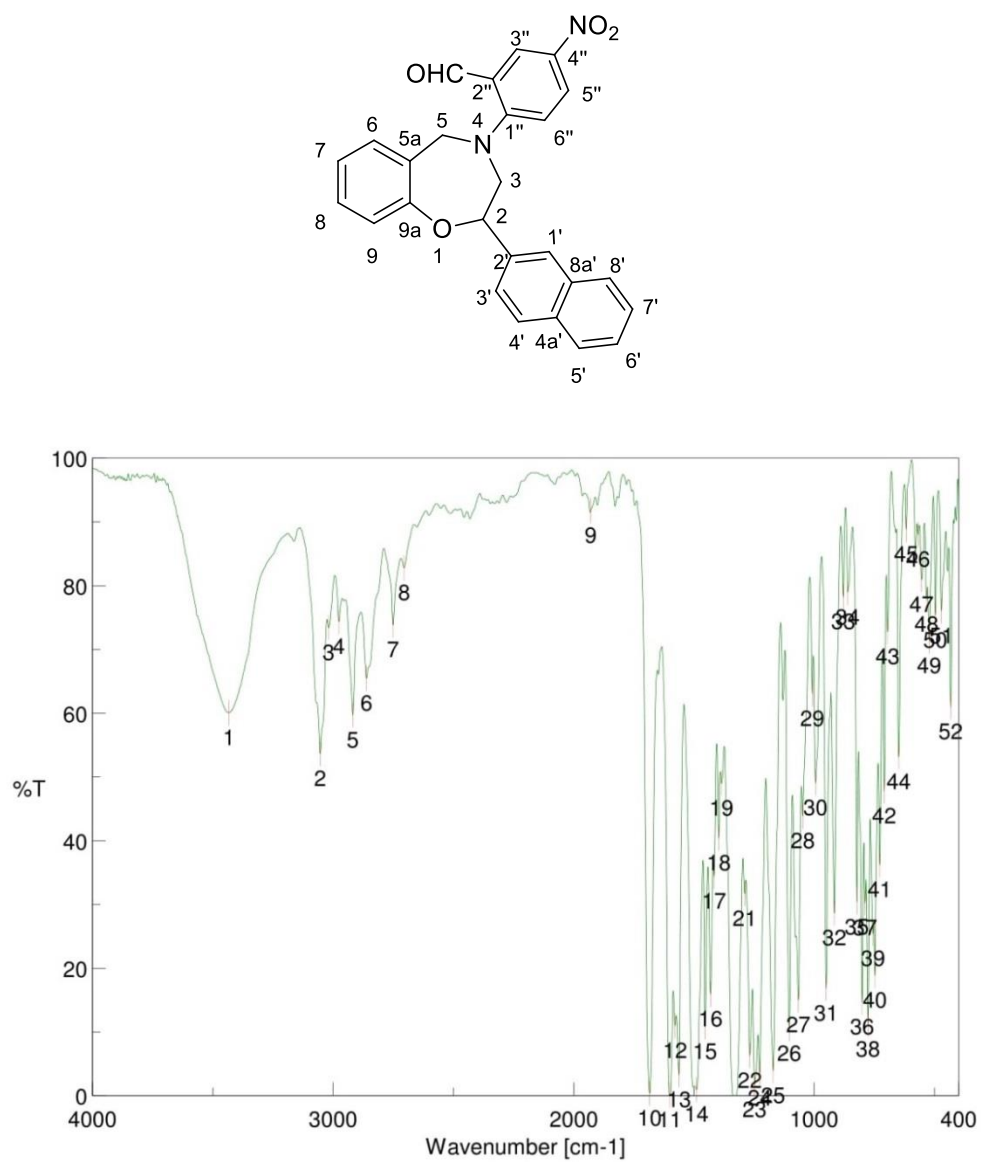

**Figure S49.** IR spectrum of *rac-1c* recorded as KBr disc

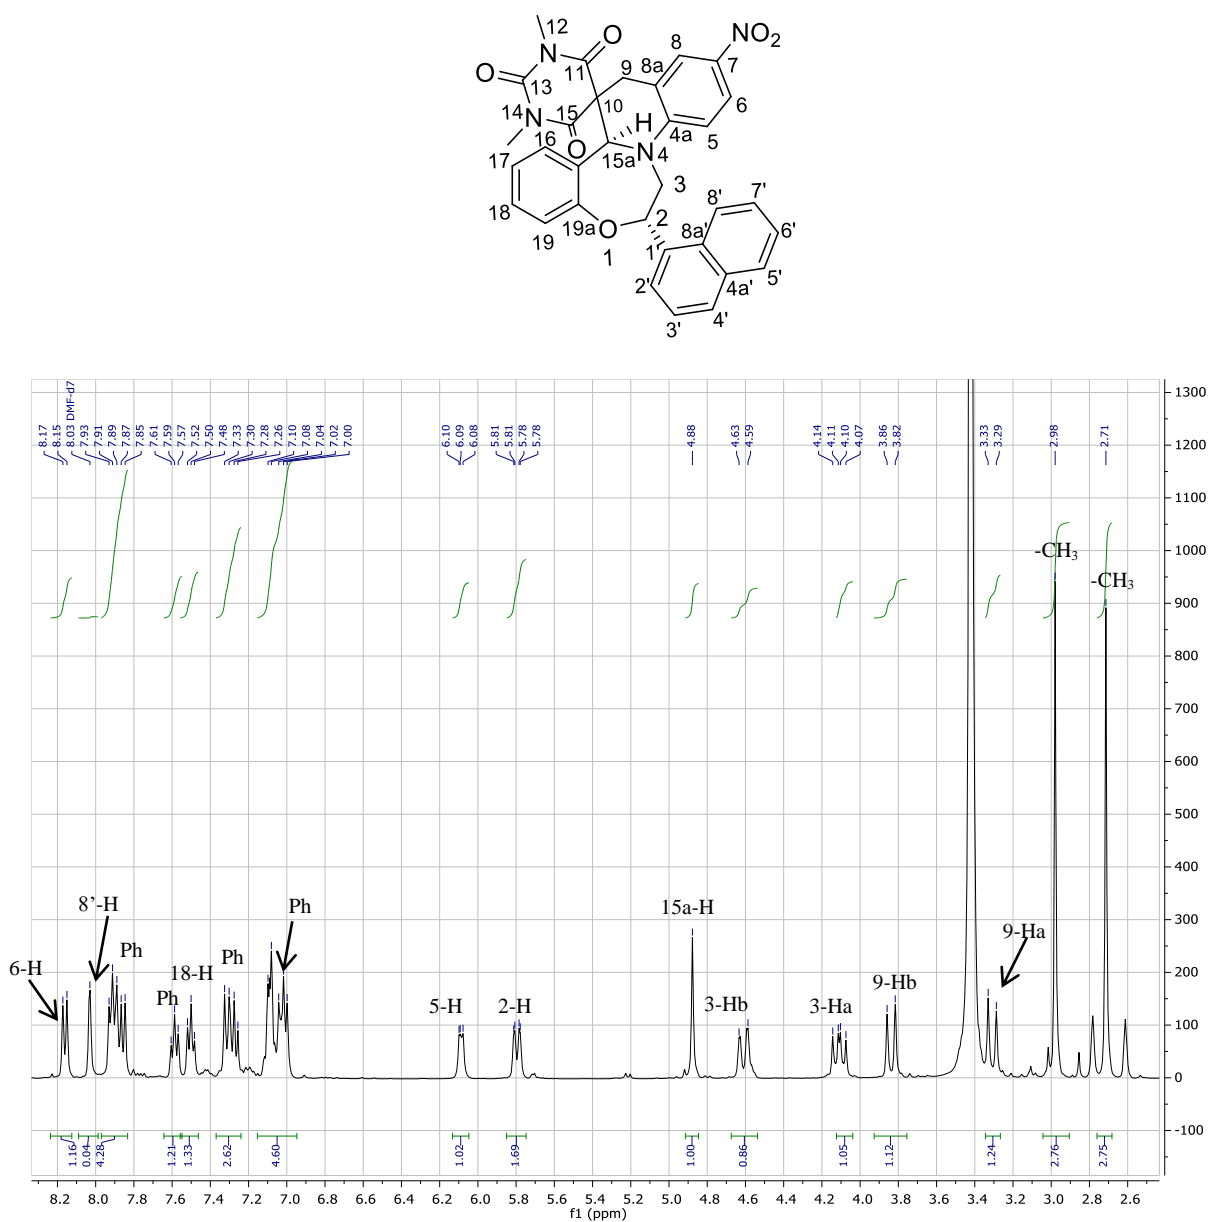

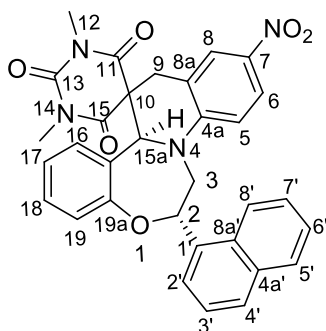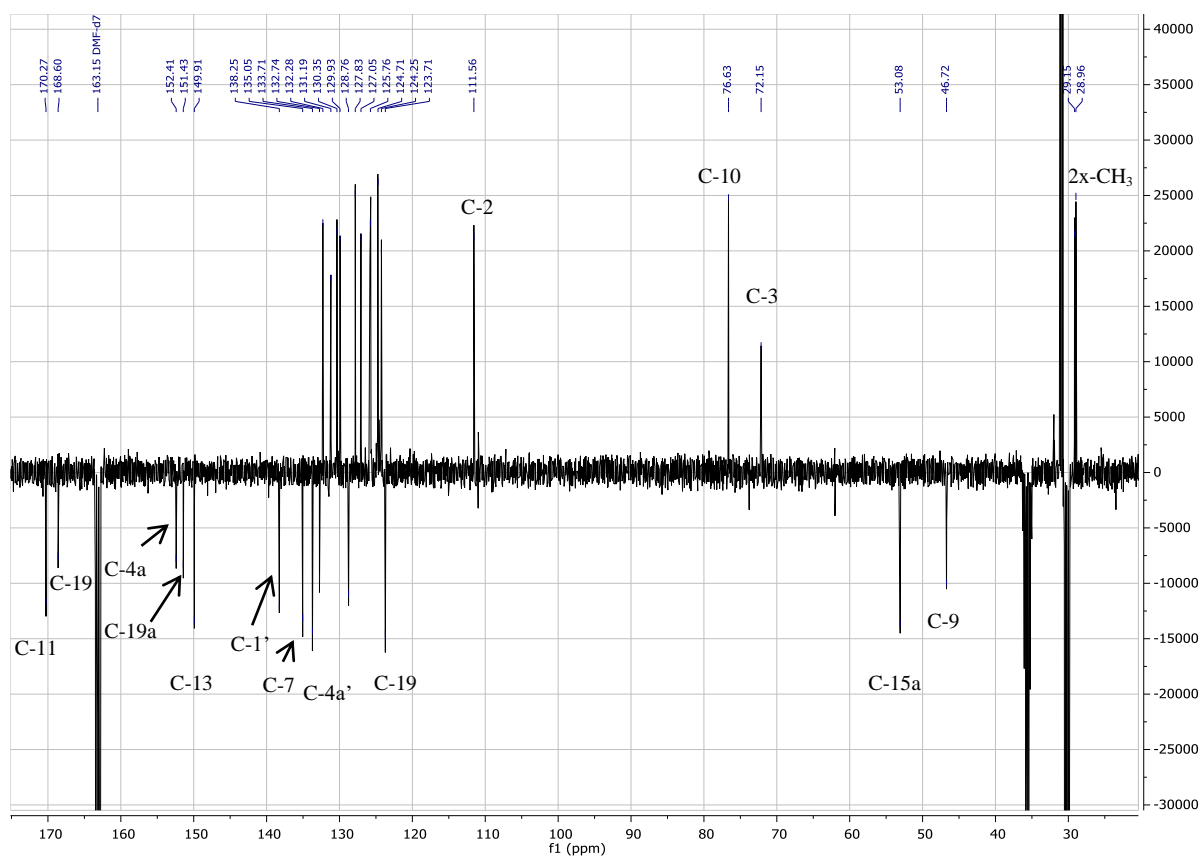

**Figure S51.** J-modulated  $^{13}\text{C}$ -NMR spectrum of *rac*-**10b** measured in  $\text{DMF-d}_7$  (100 MHz)

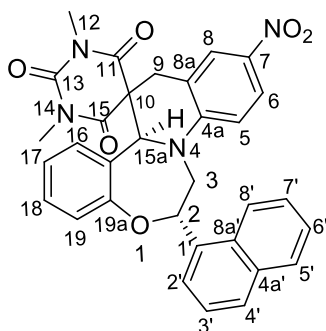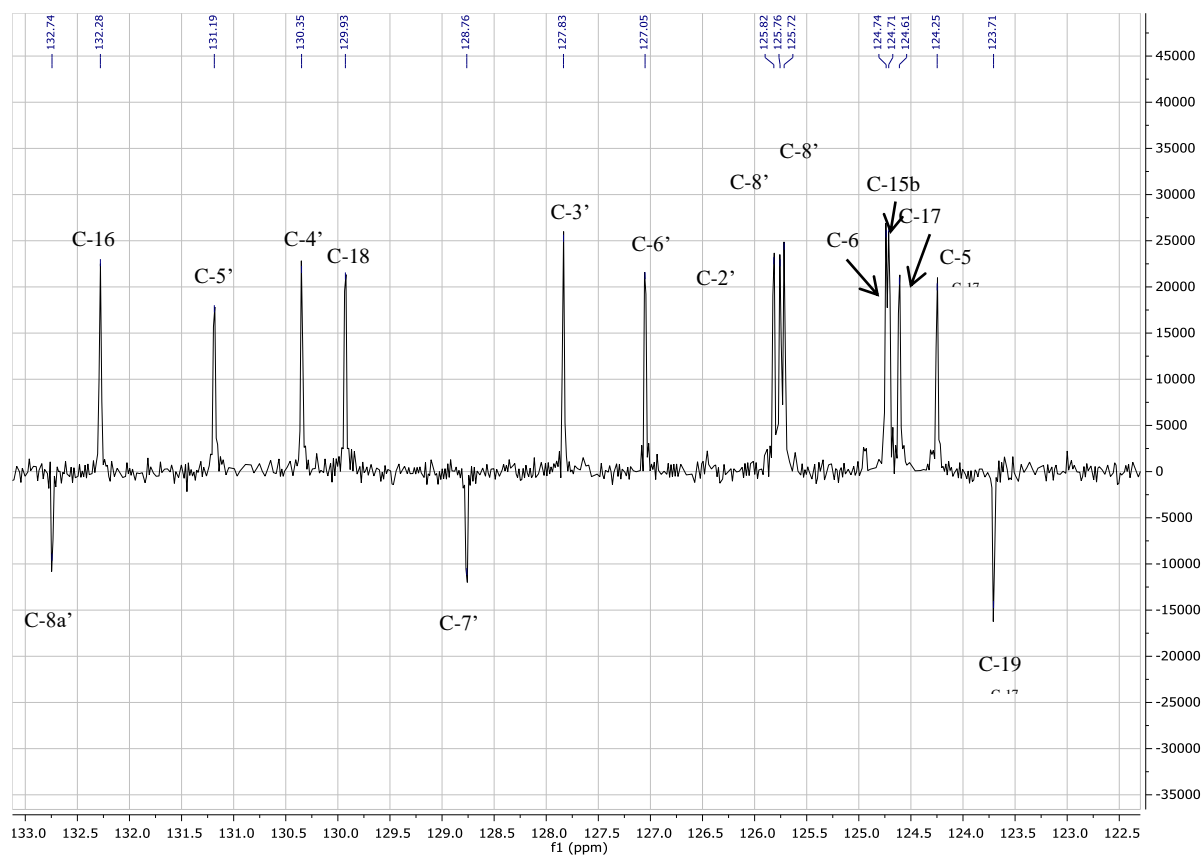

**Figure S52.** J-modulated  $^{13}\text{C}$ -NMR spectrum of *rac*-**10b** measured in  $\text{DMF-d}_7$  (100 MHz)

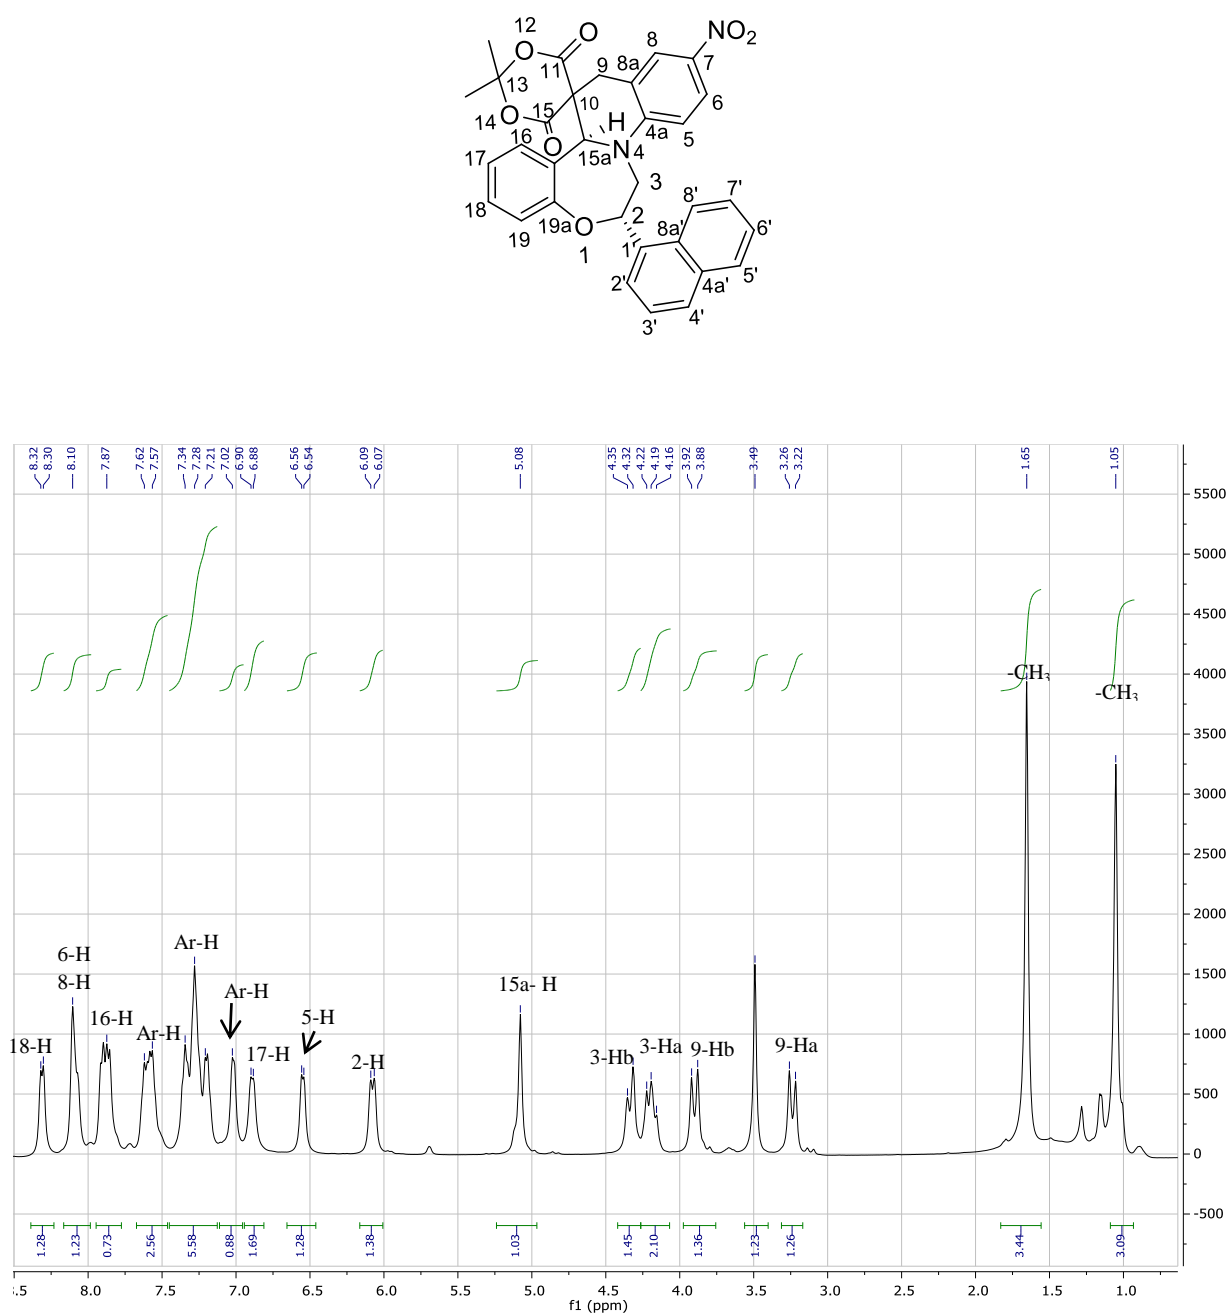

**Figure S53.** <sup>1</sup>H-NMR spectrum of *rac-11b* measured in CDCl<sub>3</sub> (400 MHz)

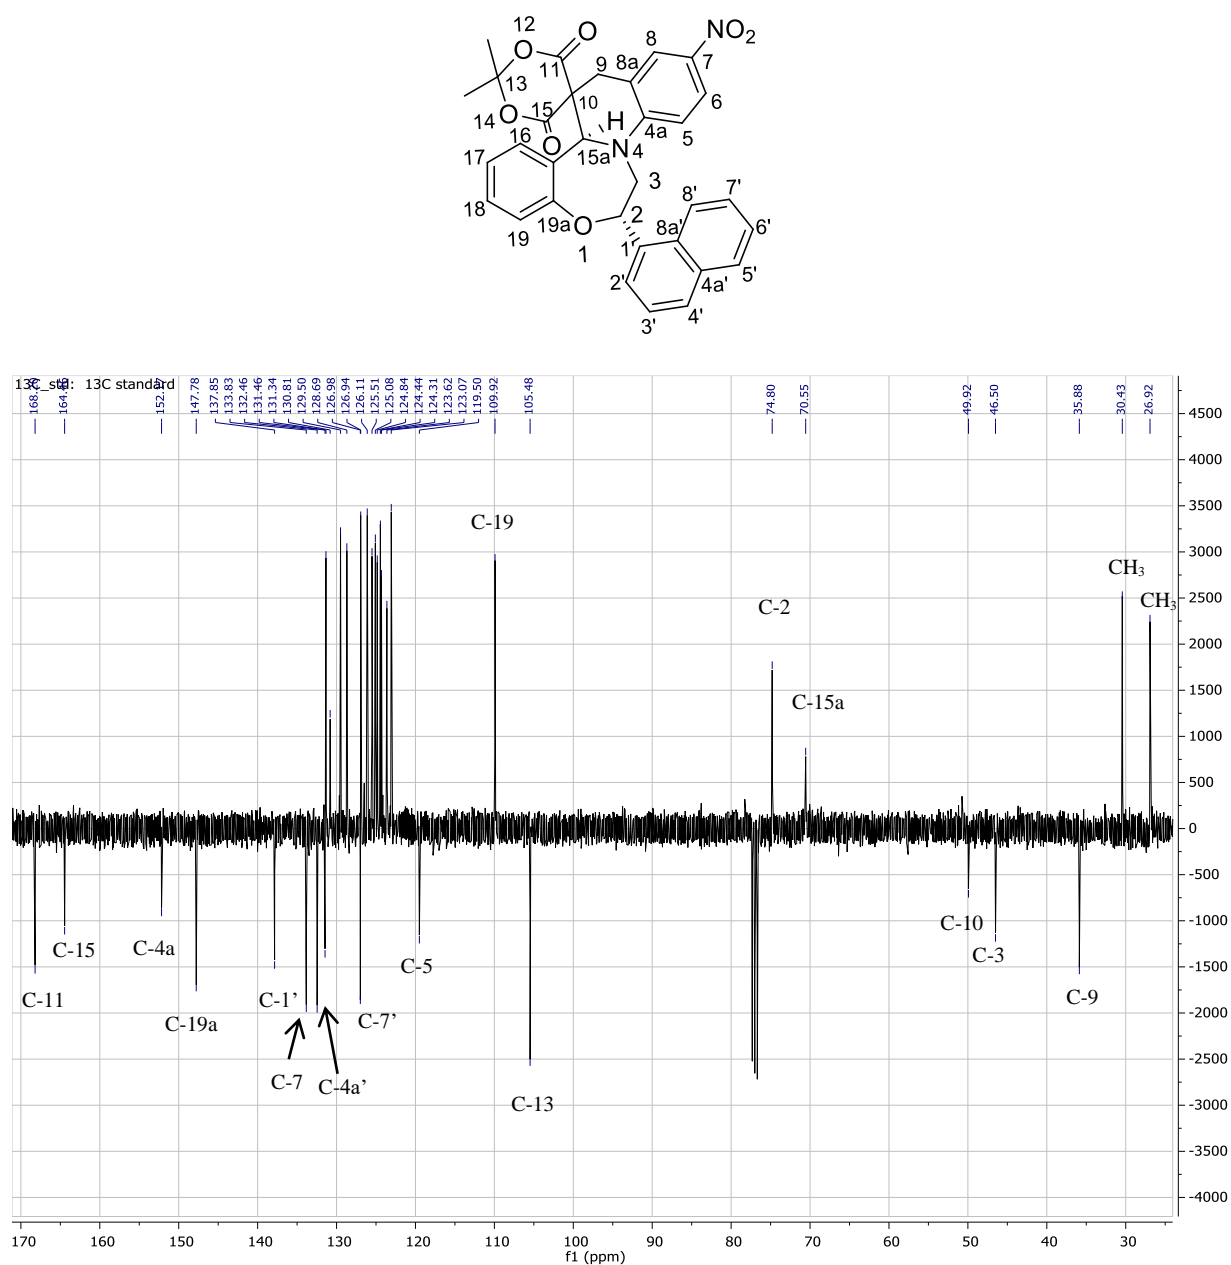

**Figure S54.** J-modulated <sup>13</sup>C-NMR spectrum of *rac-11b* measured in CDCl<sub>3</sub> (100 MHz)

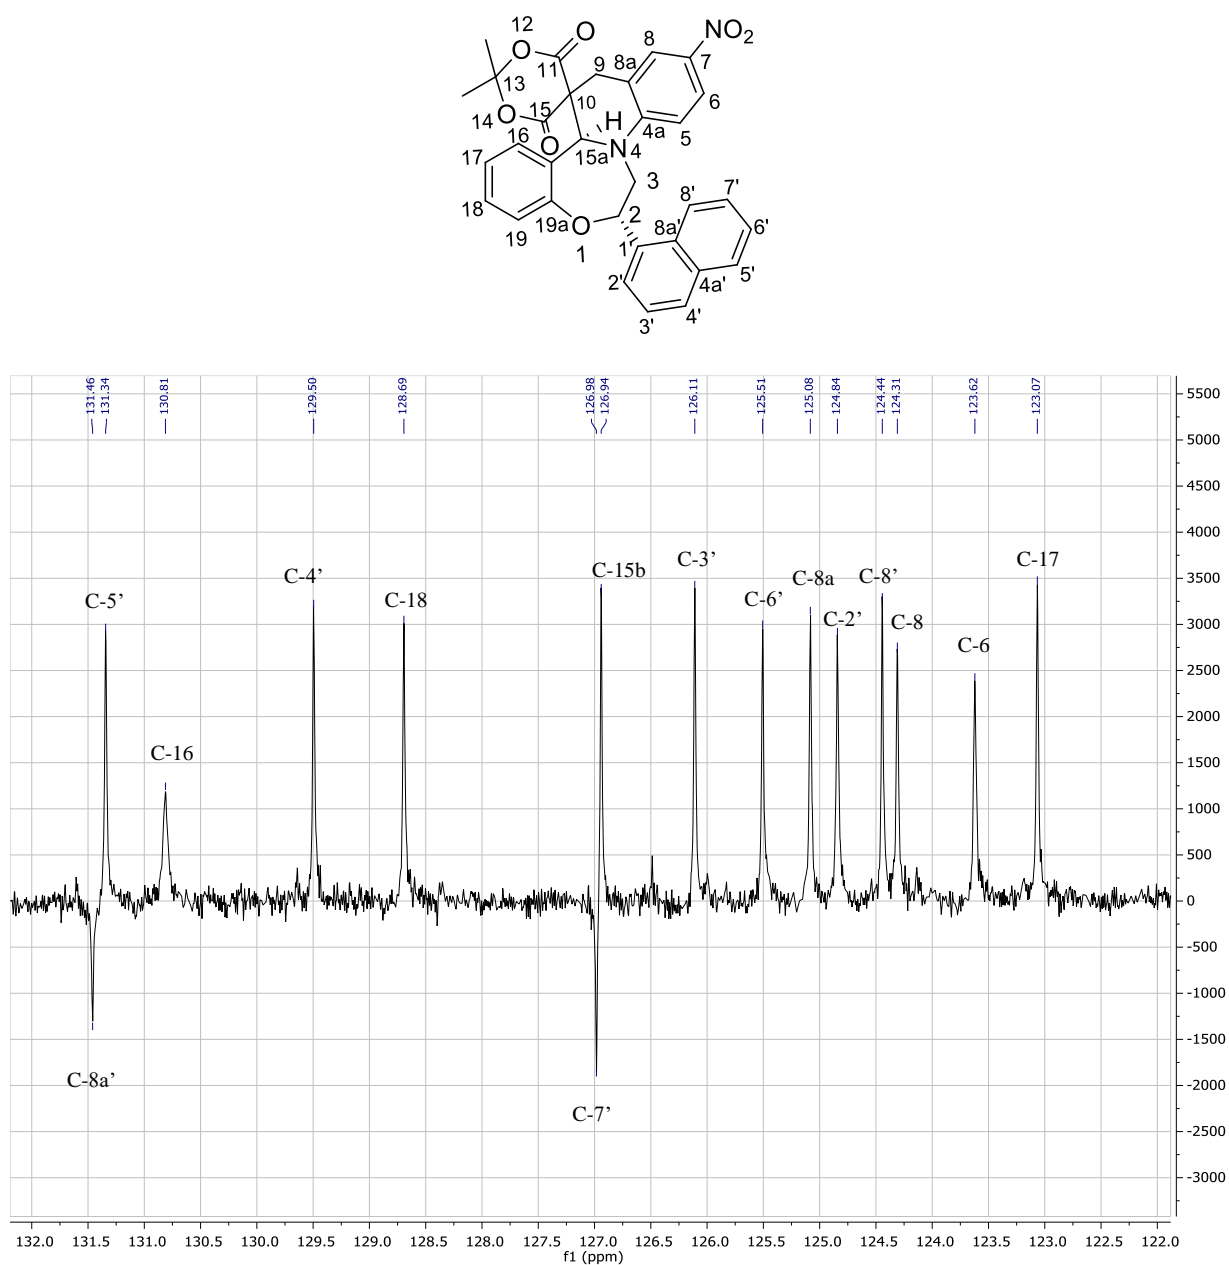

**Figure S55.** J-modulated <sup>13</sup>C-NMR spectrum of *rac-11b* measured in CDCl<sub>3</sub> (100 MHz)

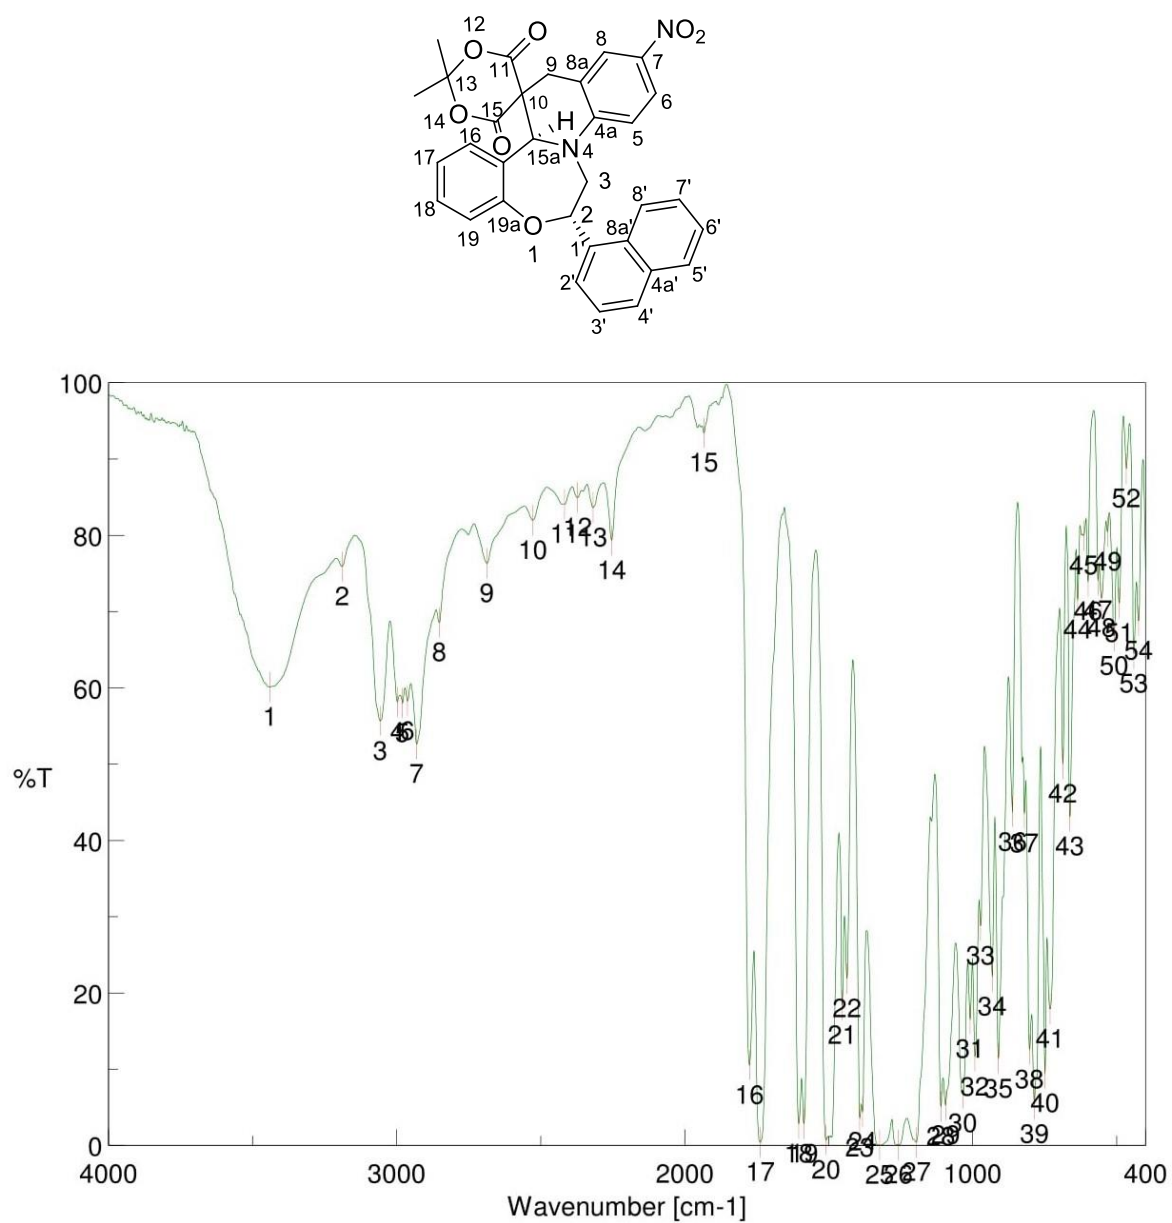

**Figure S56.** IR spectrum of *rac*-11b recorded as KBr disc

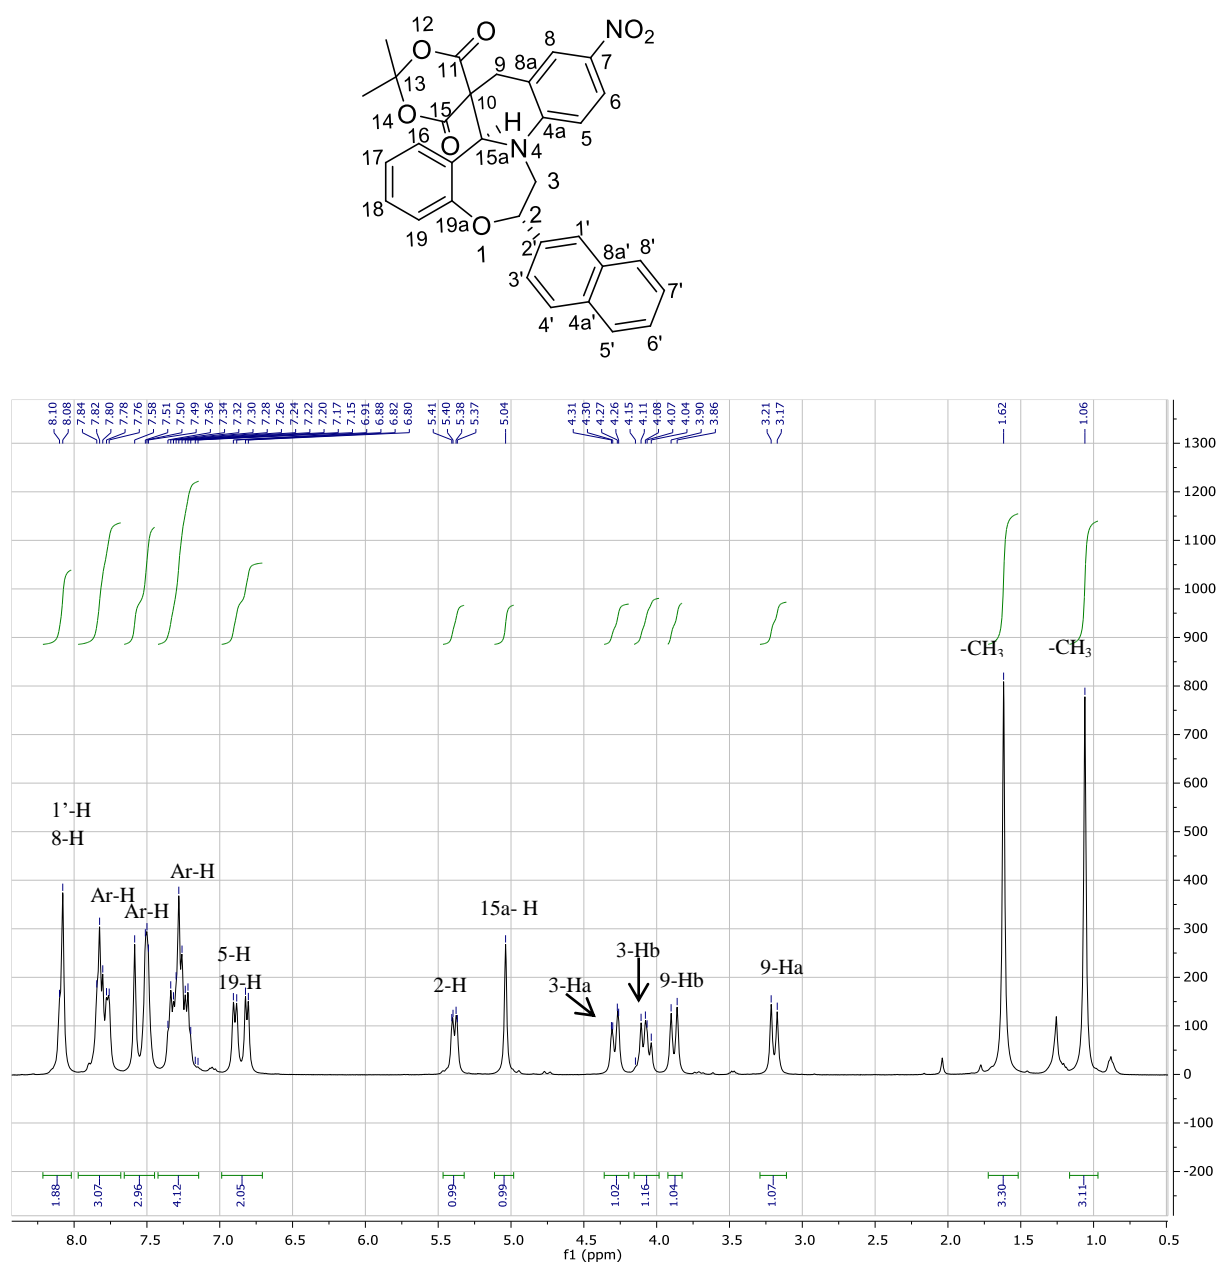

**Figure S57.**  $^1\text{H}$ -NMR spectrum of *rac*-**11c** measured in  $\text{CDCl}_3$  (400 MHz)

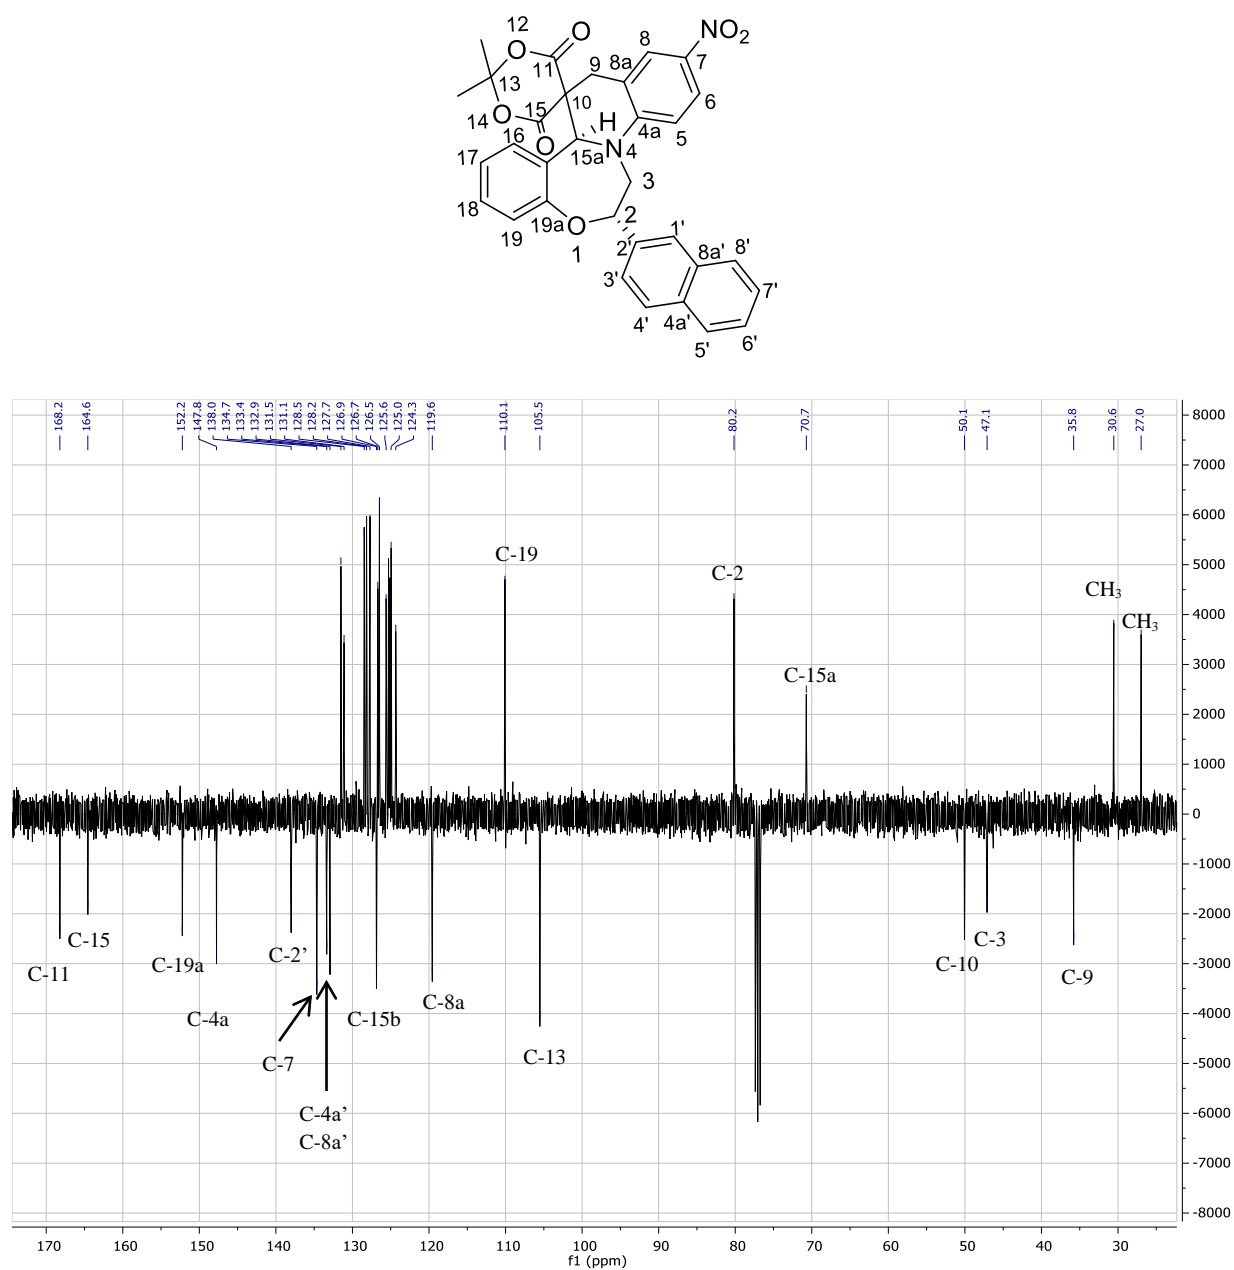

**Figure S58.** J-modulated <sup>13</sup>C-NMR spectrum of *rac-11c* measured in CDCl<sub>3</sub> (100 MHz)

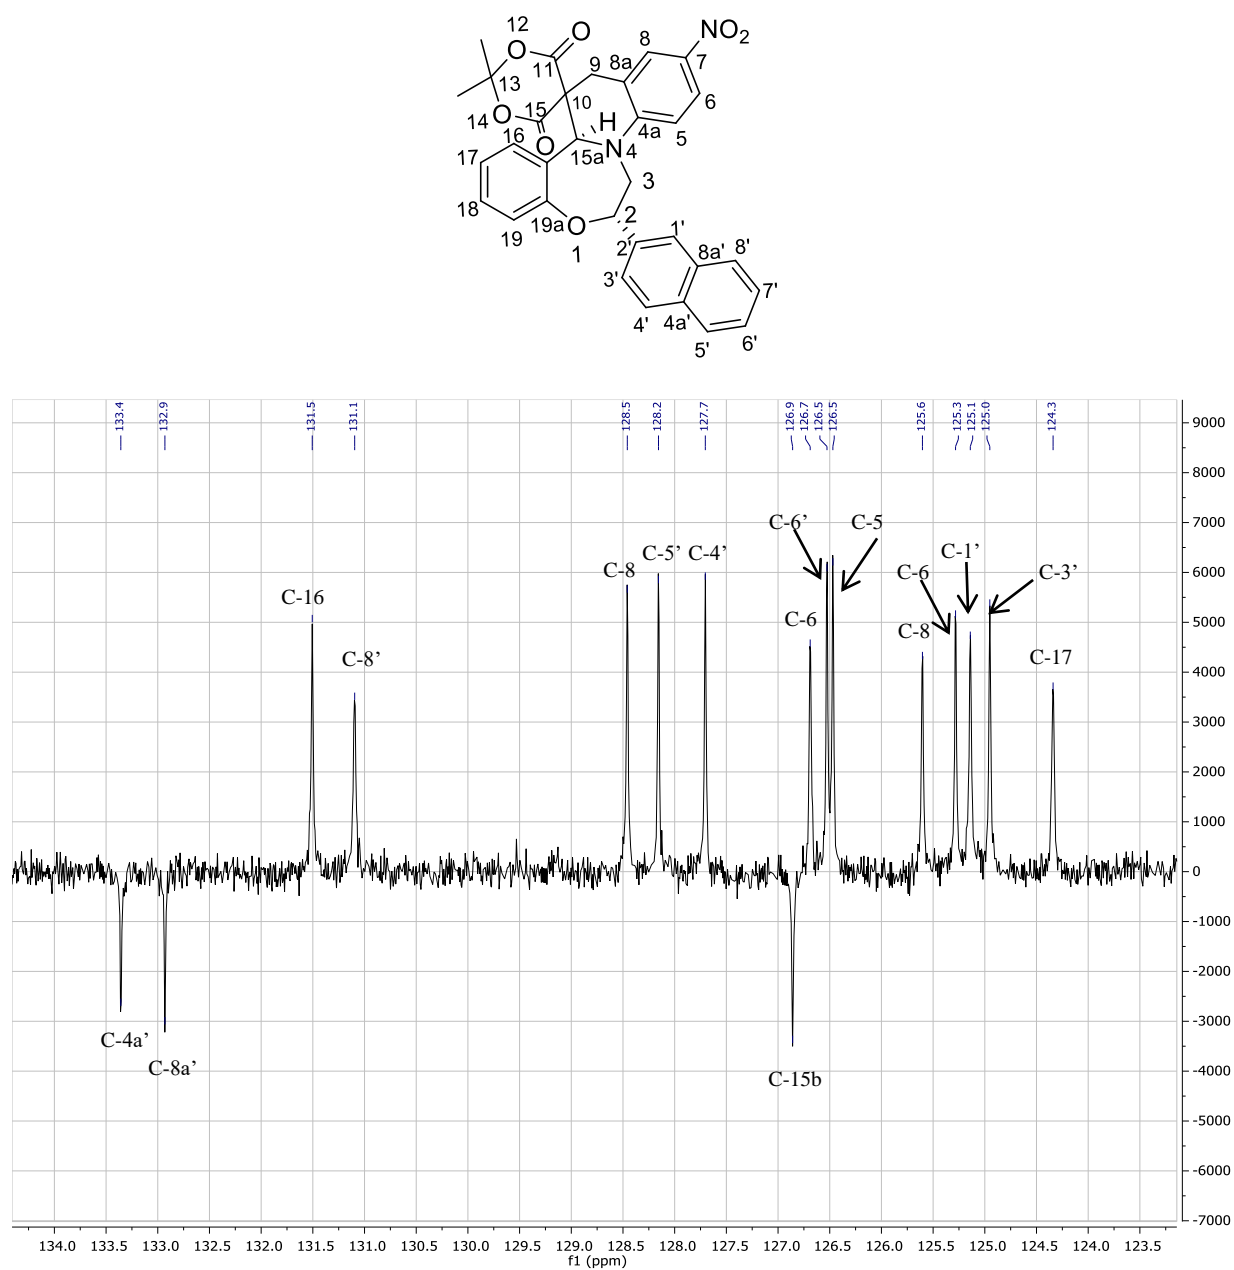

**Figure S59.** J-modulated <sup>13</sup>C-NMR spectrum of *rac-11c* measured in CDCl<sub>3</sub> (100 MHz)

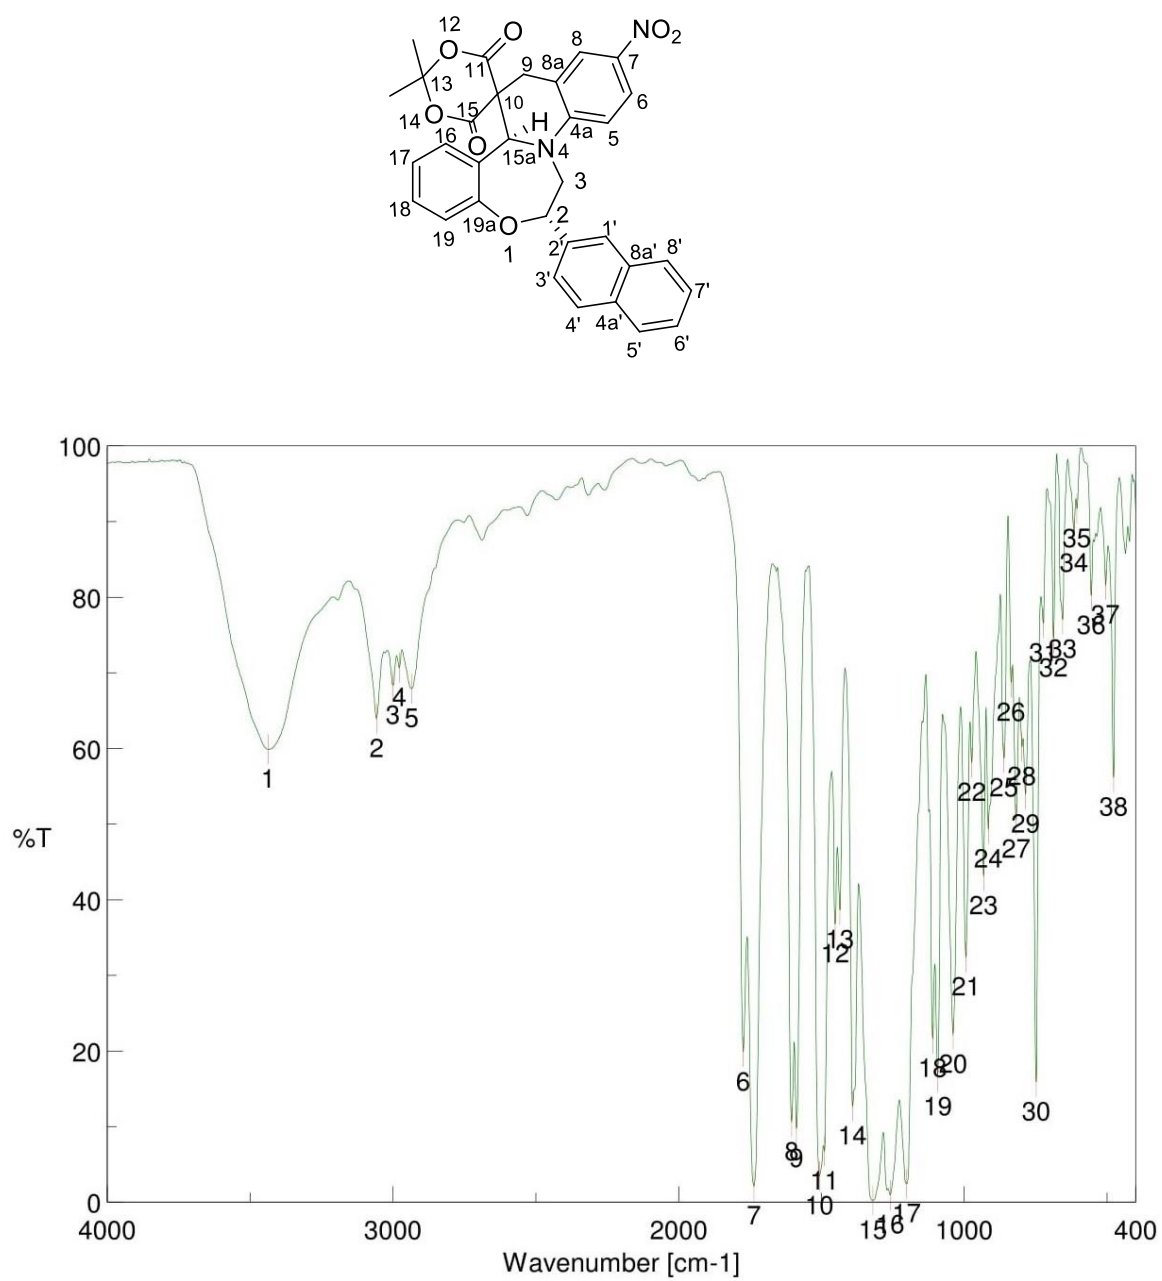

**Figure S60.** IR spectrum of *rac-11c* recorded as KBr disc

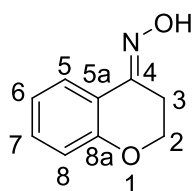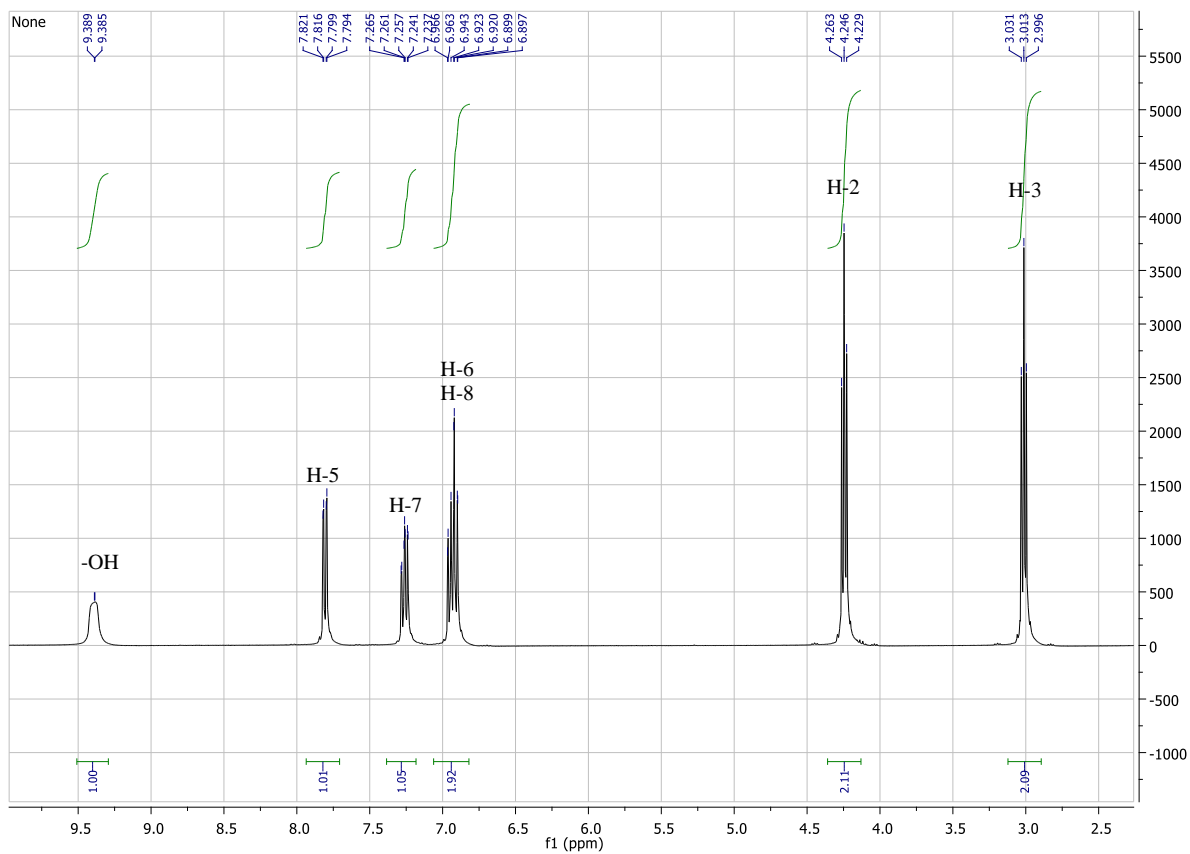

**Figure S61.**  $^1\text{H}$ -NMR spectrum of **13** measured in  $\text{CDCl}_3$  (360 MHz)

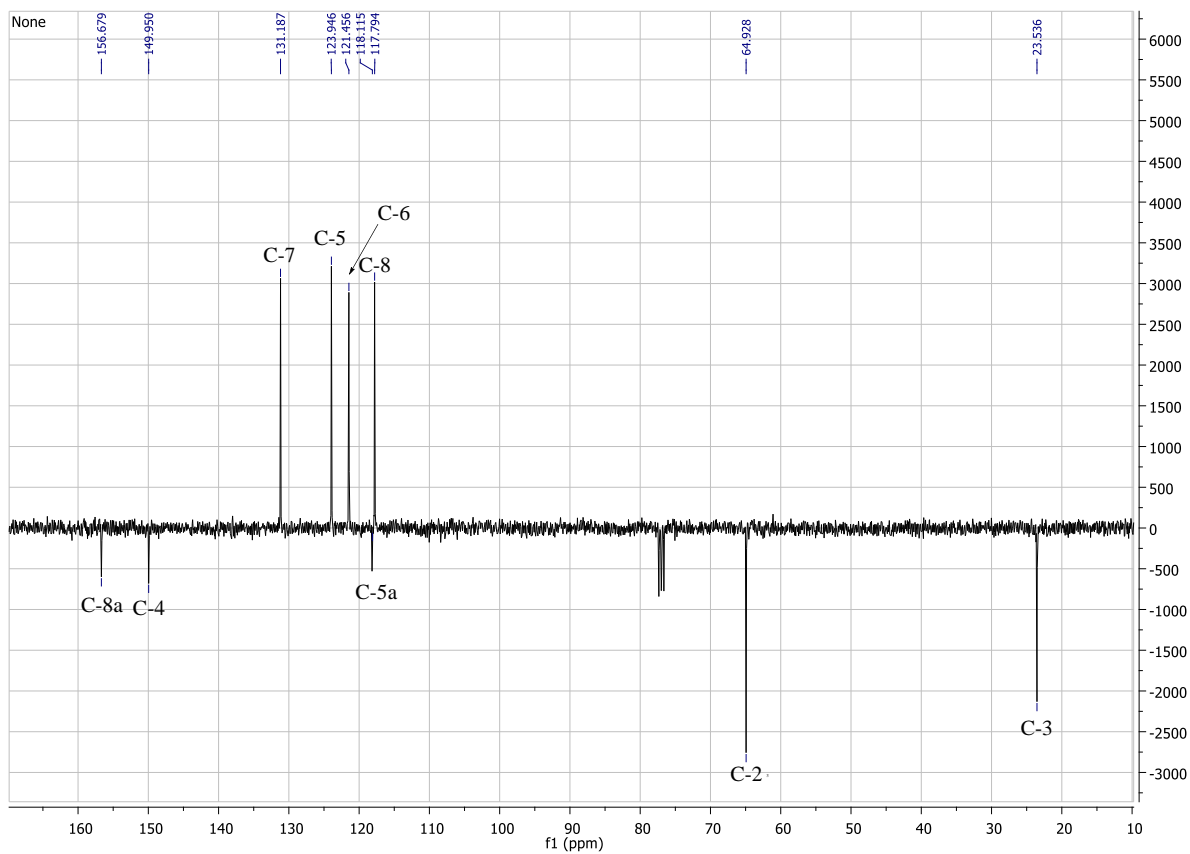

**Figure S65.** J-modulated  $^{13}\text{C}$ -NMR spectrum of **13** measured in  $\text{CDCl}_3$  (90 MHz)

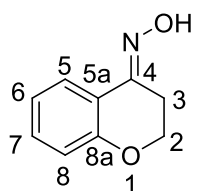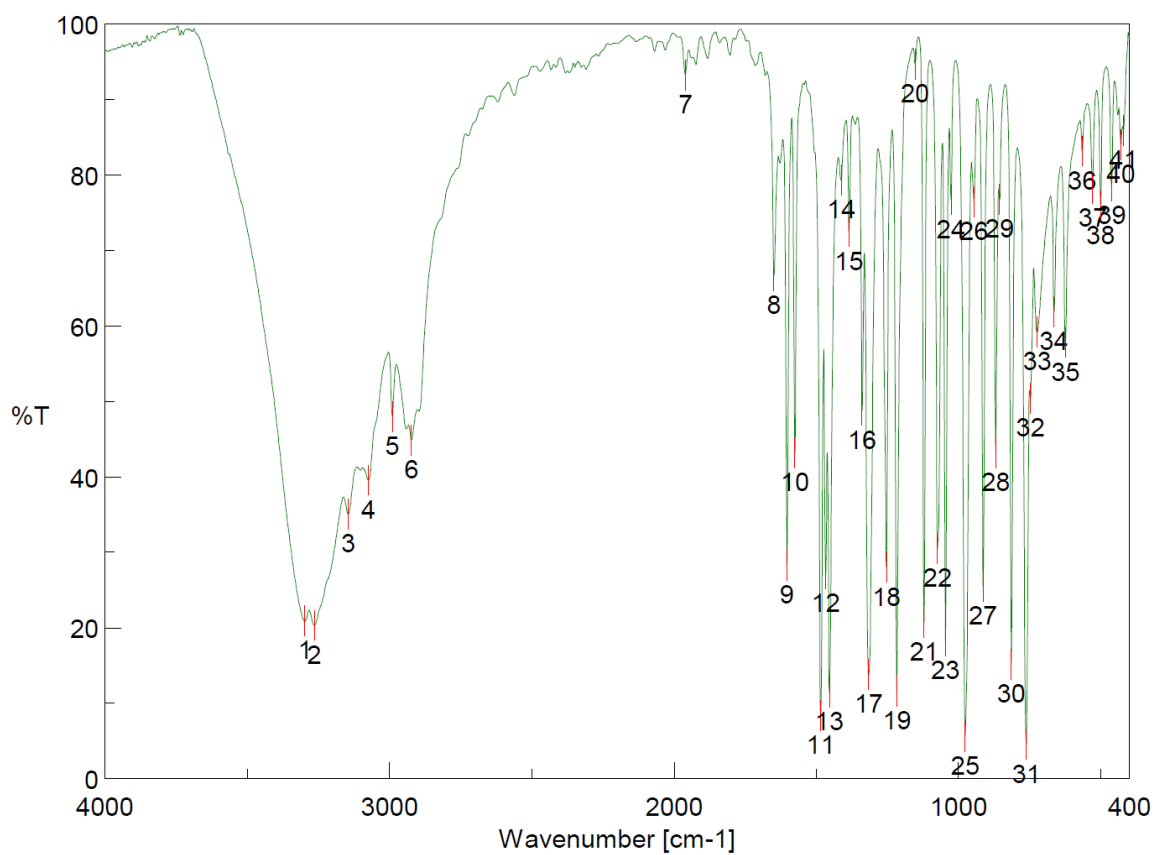

**Figure S66.** IR spectrum of **13** recorded as KBr disc

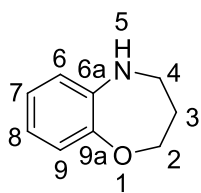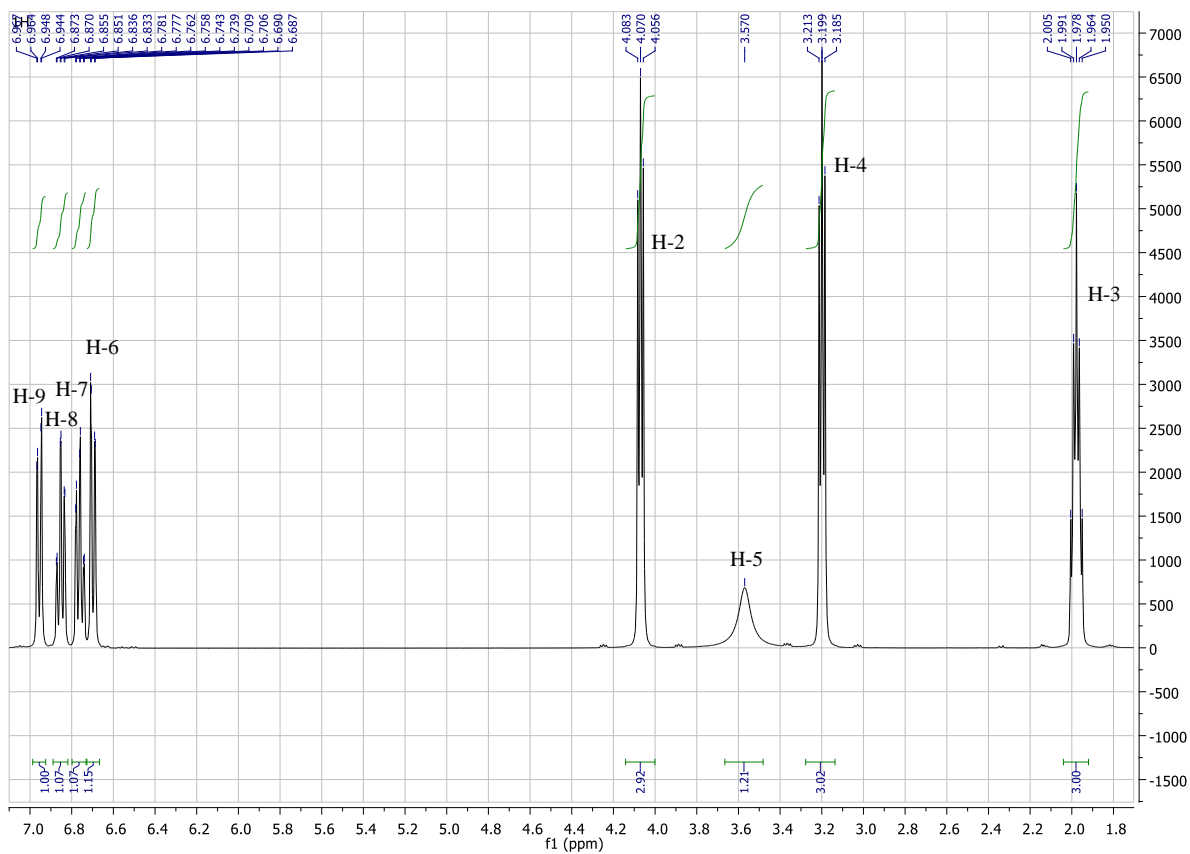

**Figure S67.**  $^1\text{H}$ -NMR spectrum of **15** measured in  $\text{CDCl}_3$  (400 MHz)

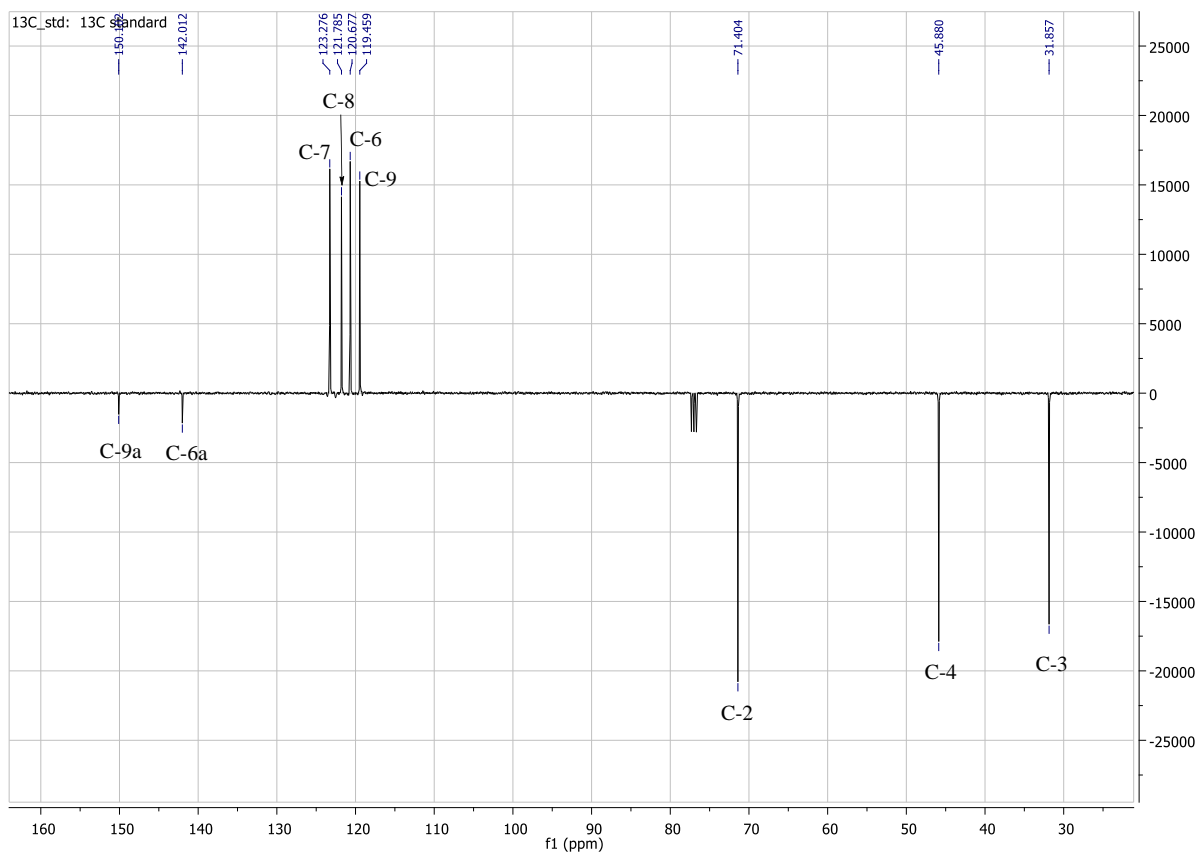

**Figure S68.** J-modulated  $^{13}\text{C}$ -NMR spectrum of **15** measured in  $\text{CDCl}_3$  (100 MHz)

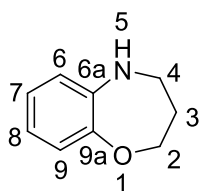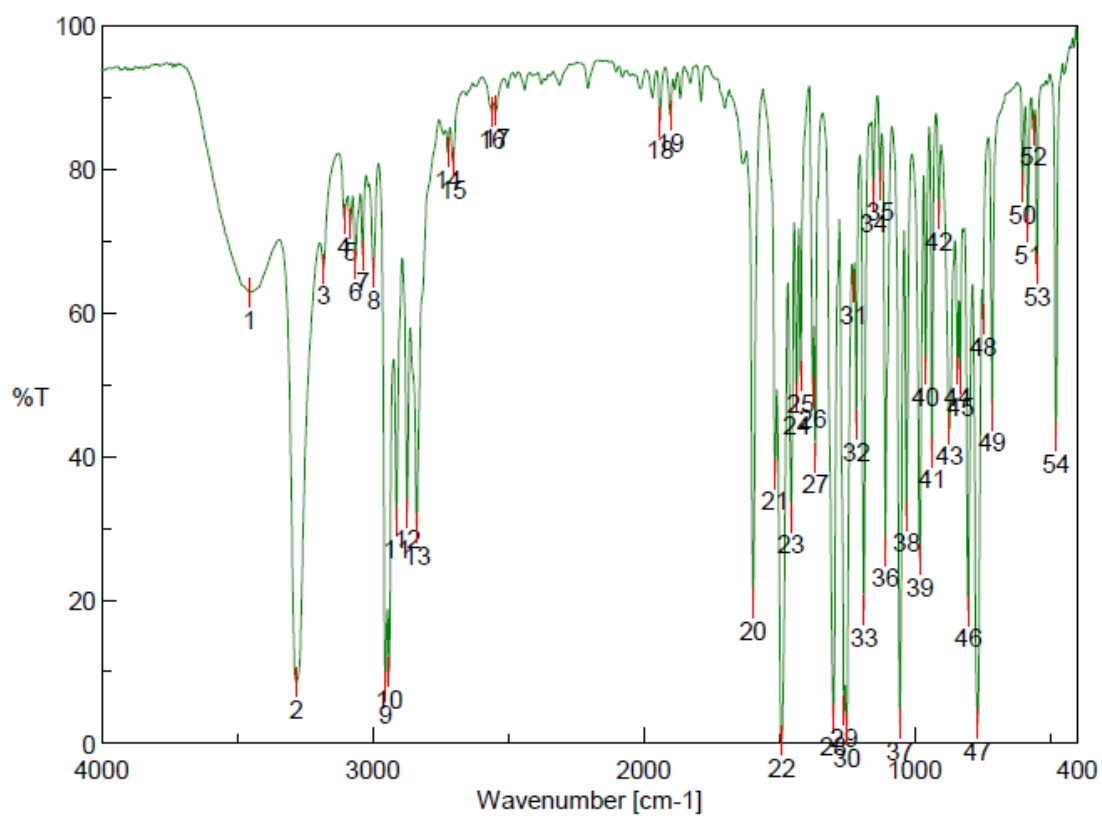

**Figure S69.** IR spectrum of **15** recorded as KBr disc

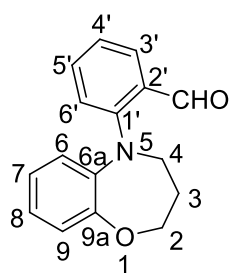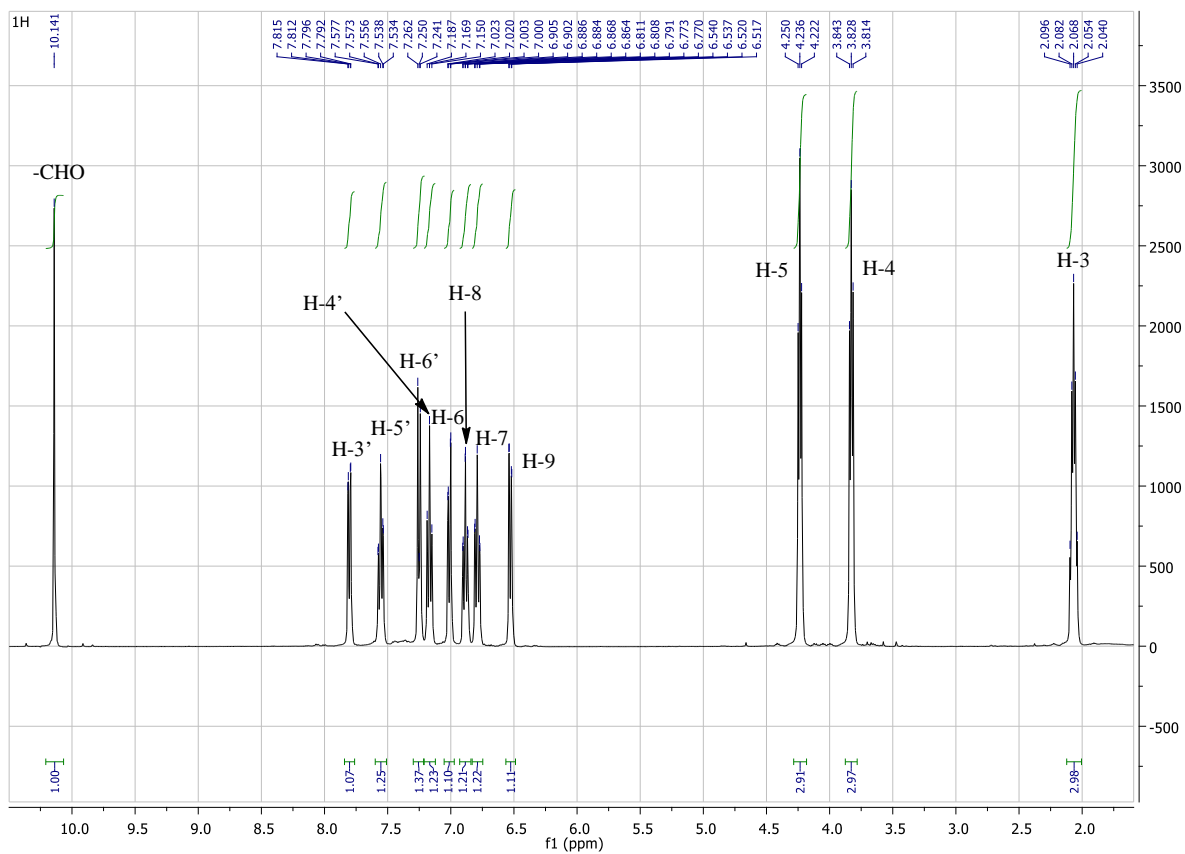

**Figure S70.**  $^1\text{H}$ -NMR spectrum of **4** measured in  $\text{CDCl}_3$  (400 MHz)

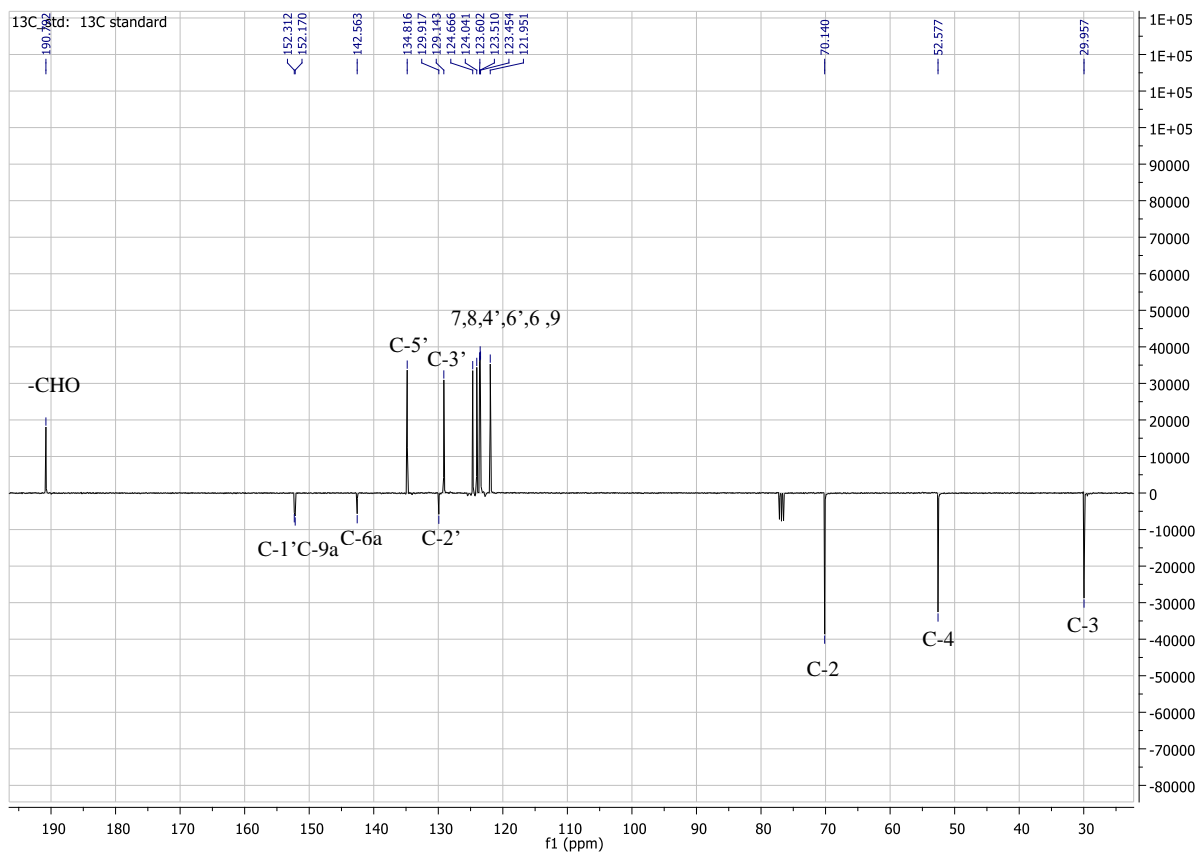

**Figure S71.** J-modulated <sup>13</sup>C-NMR spectrum of **4** measured in CDCl<sub>3</sub> (100 MHz)

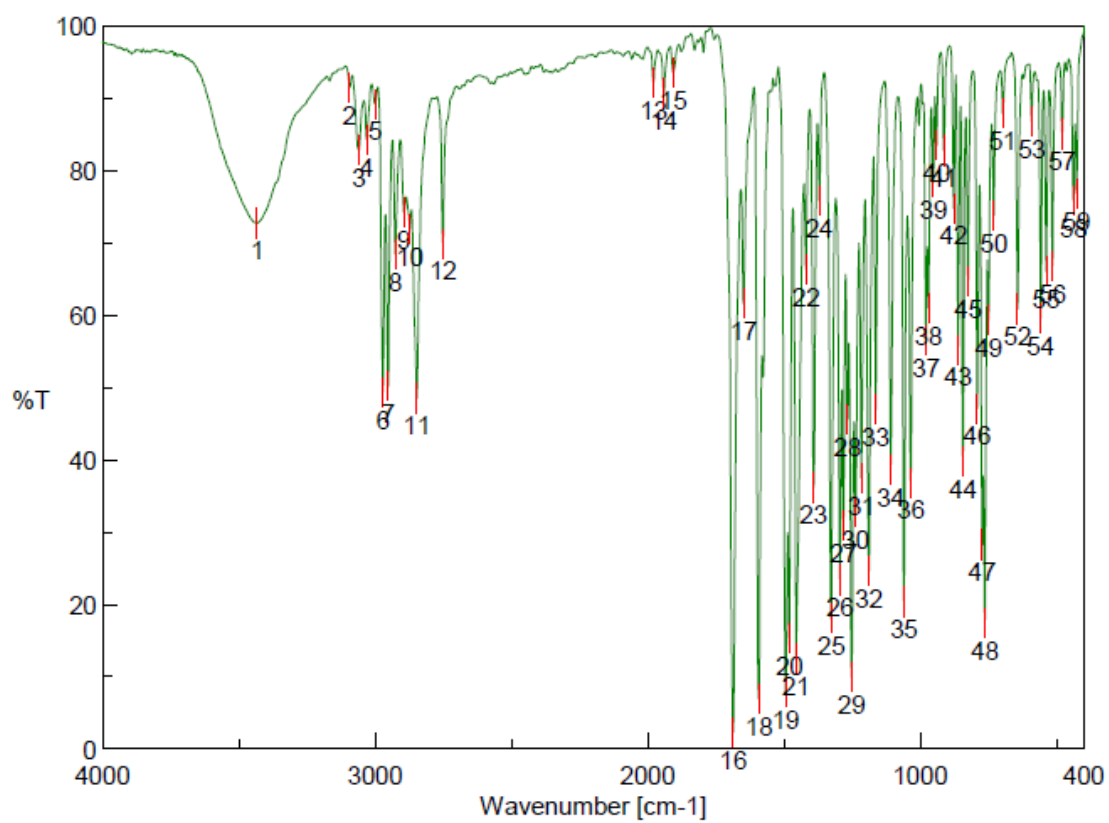

**Figure S72.** IR spectrum of **4** recorded as KBr disc

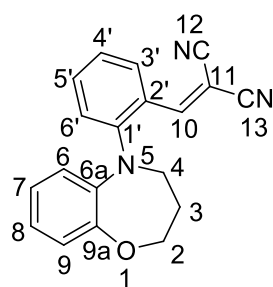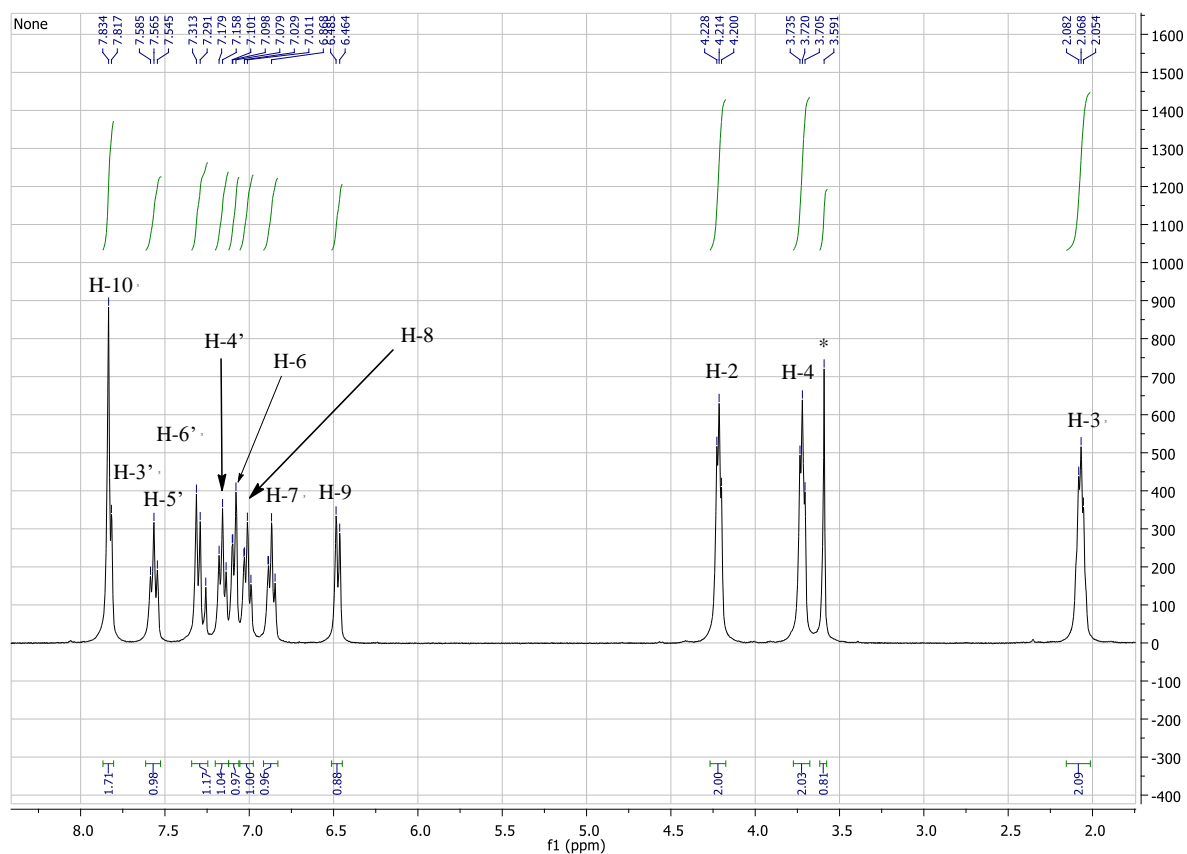

**Figure S73.**  $^1\text{H}$ -NMR spectrum of **20** measured in  $\text{CDCl}_3$  (360 MHz)

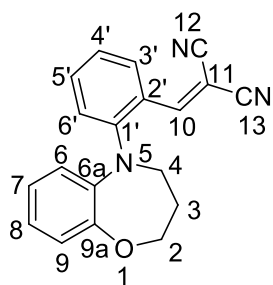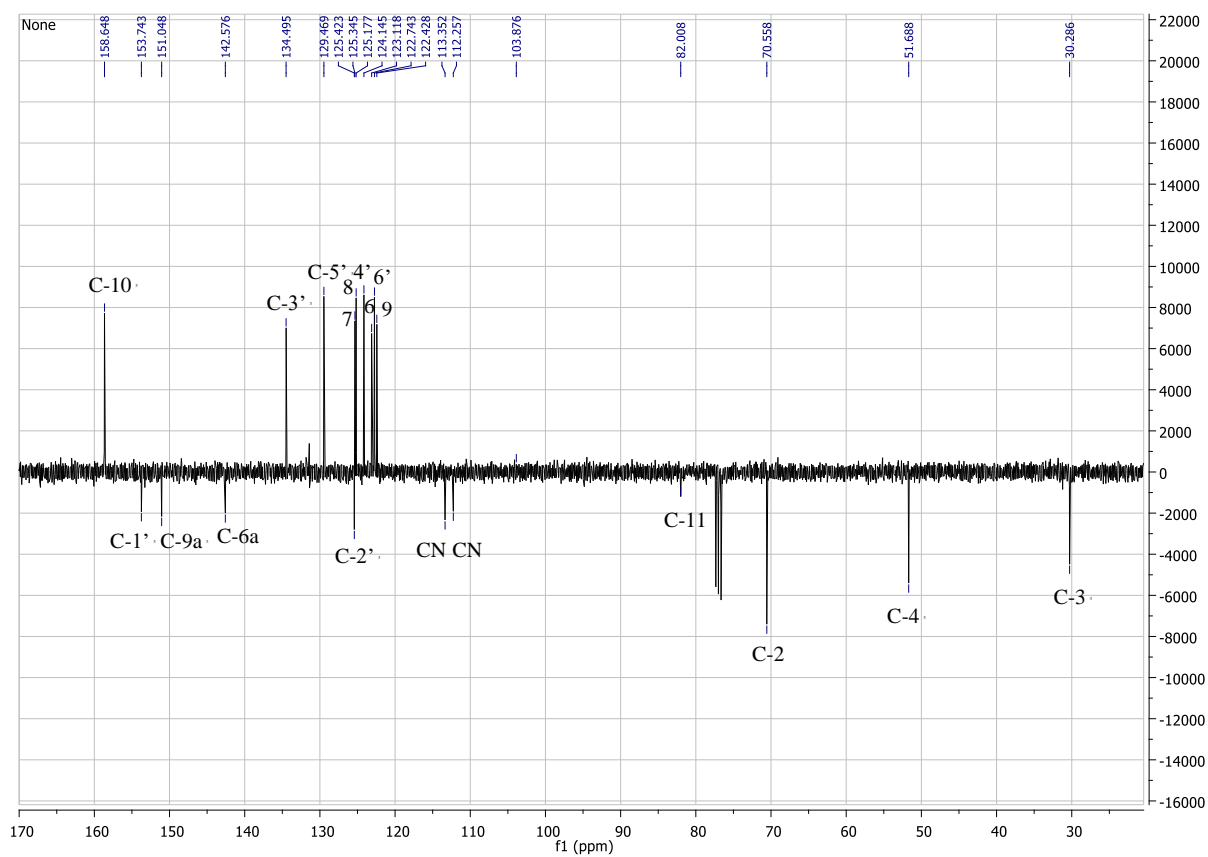

**Figure S74.** J-modulated  $^{13}\text{C}$ -NMR spectrum of **20** measured in  $\text{CDCl}_3$  (90 MHz)

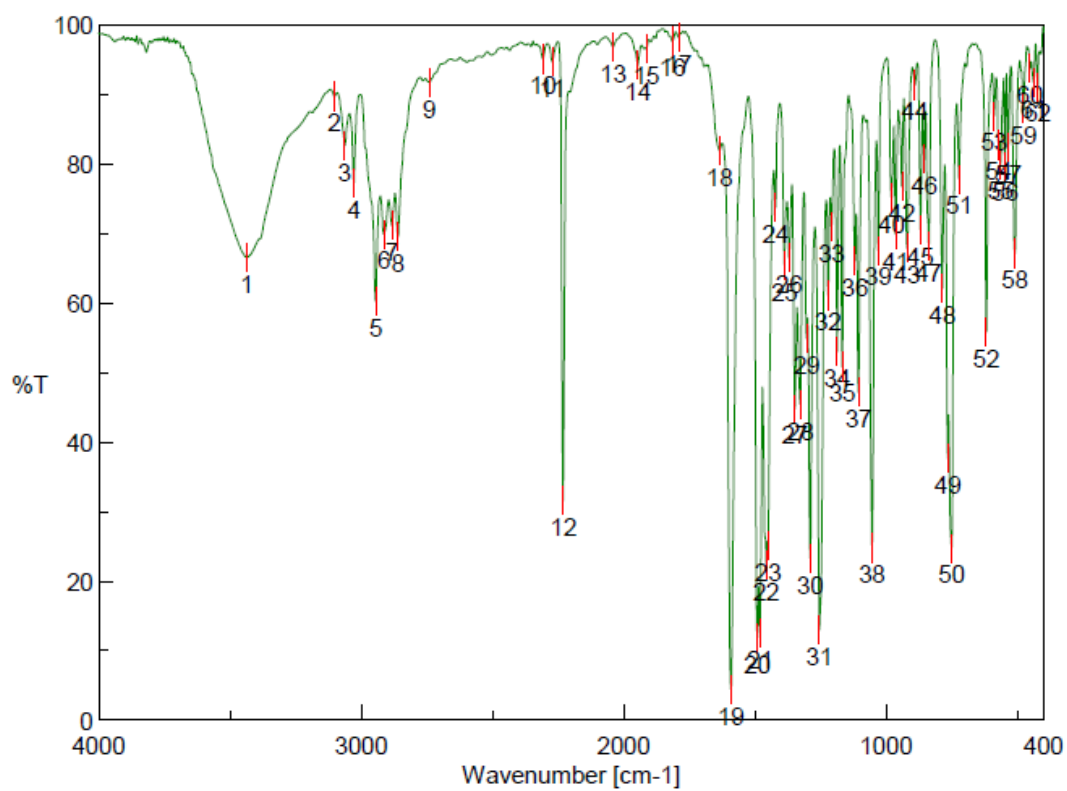

**Figure S75.** IR spectrum of **20** recorded as KBr disc

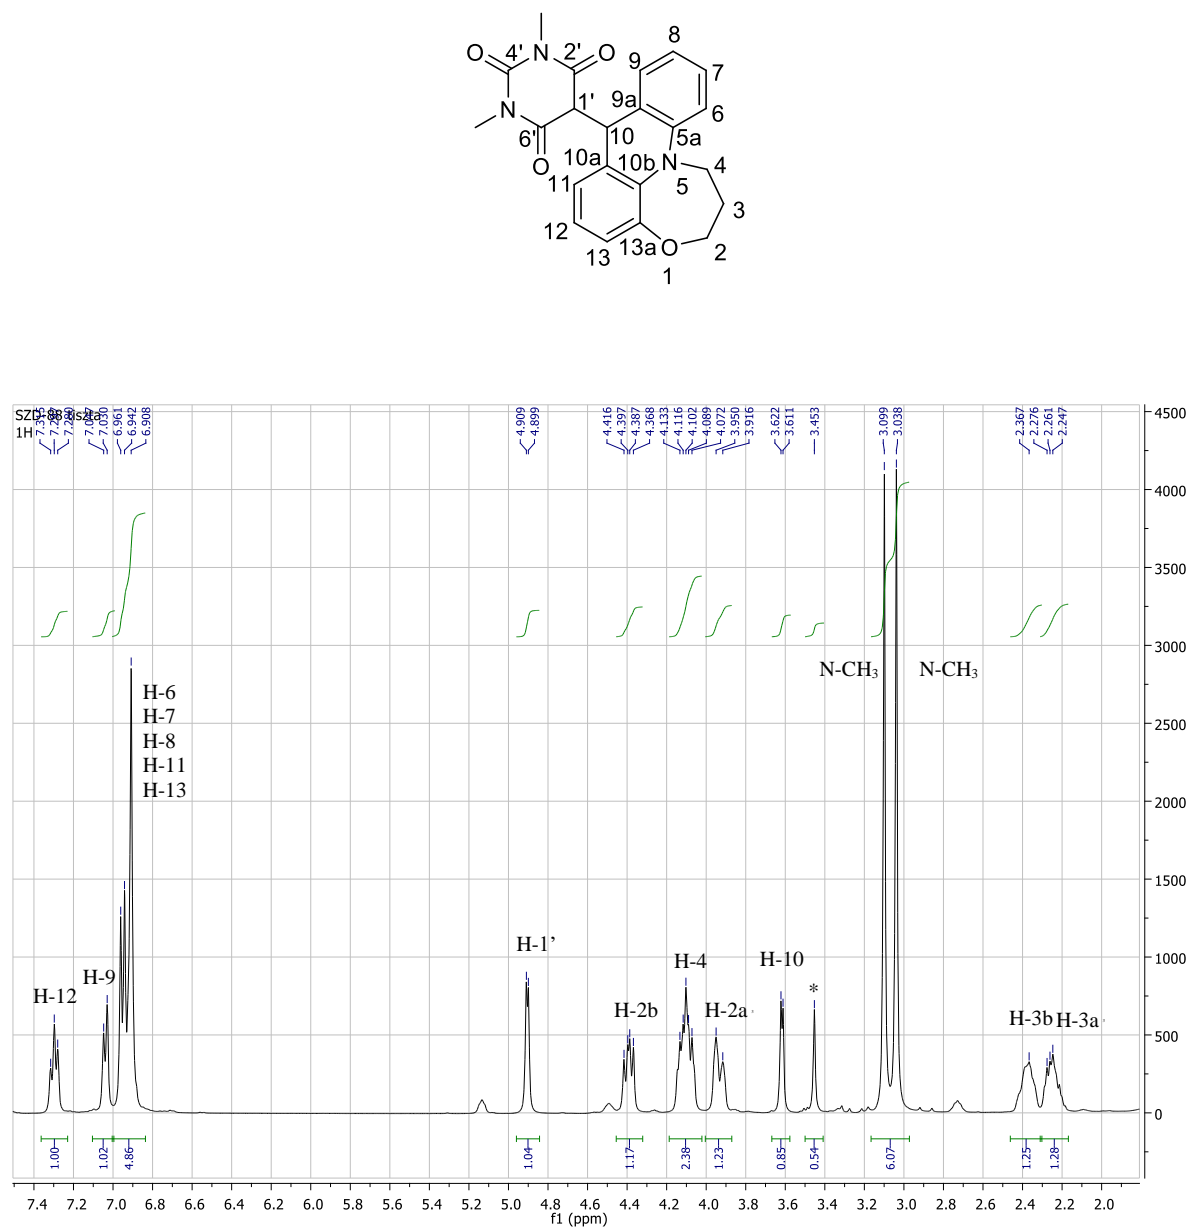

**Figure S76.**  $^1\text{H}$ -NMR spectrum of **6** measured in  $\text{CDCl}_3$  (400 MHz)

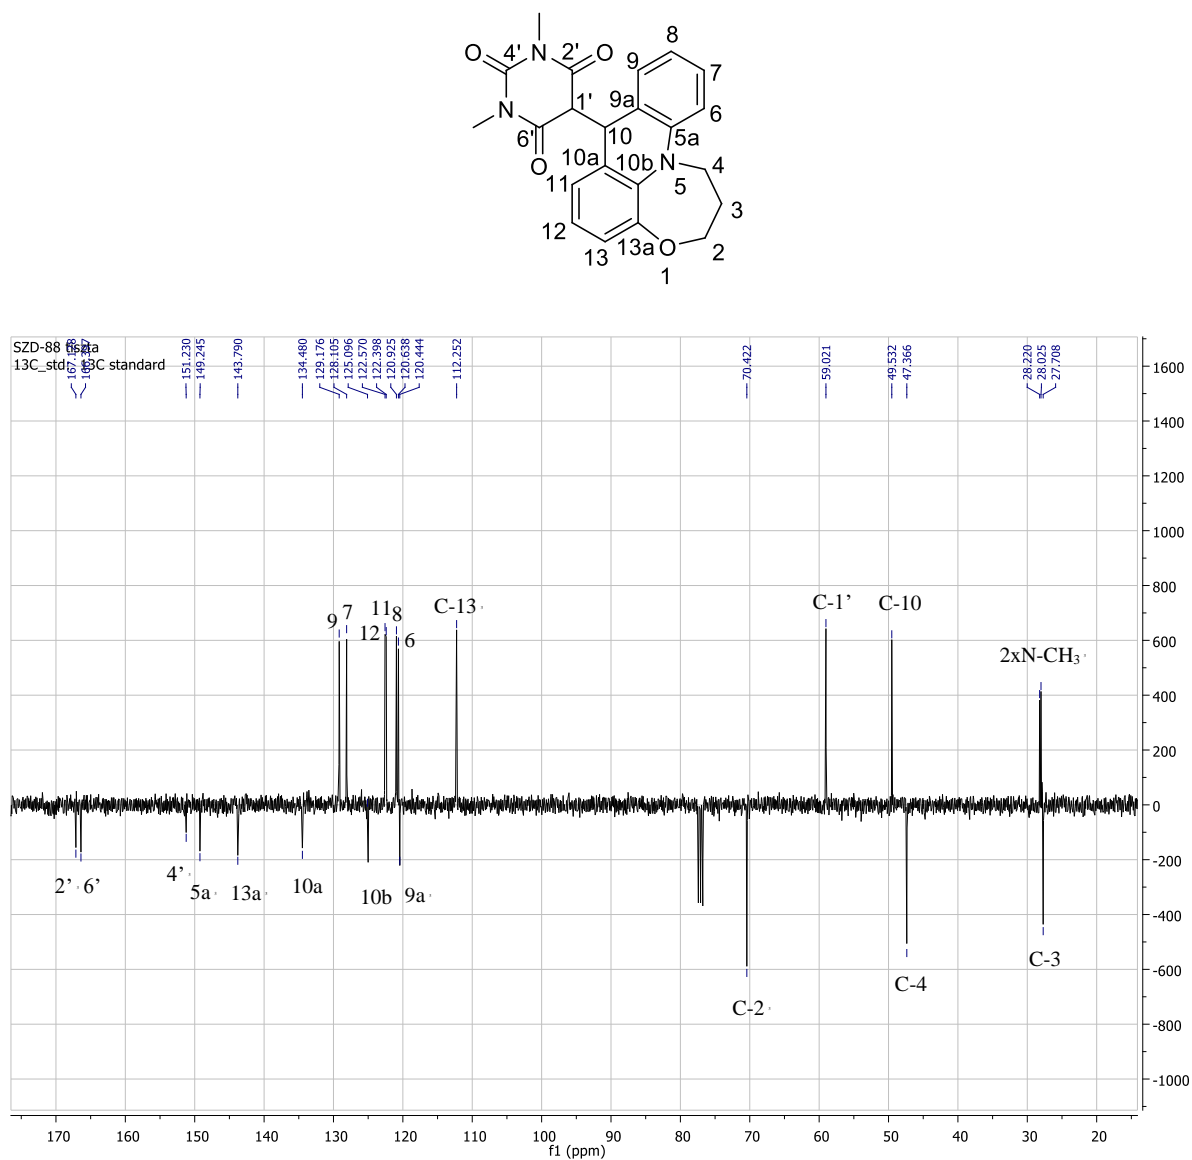

**Figure S77.** J-modulated <sup>13</sup>C-NMR spectrum of **6** measured in CDCl<sub>3</sub> (100 MHz)

| organocatalyst                                                                                           | Reaction time (day) |   | Conversion (%) |    | ee (%) |     |
|----------------------------------------------------------------------------------------------------------|---------------------|---|----------------|----|--------|-----|
|                                                                                                          | A                   | B | A              | B  | A      | B   |
| 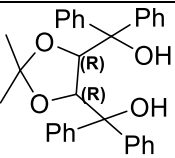                        | 21                  | 9 | 22             | 25 | 6.1    | 6.9 |
| 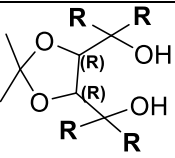<br>R: $\alpha$ -naftil | 21                  | 9 | 26             | 26 | 7.3    | 5.4 |
| 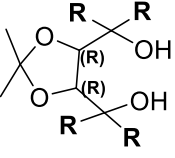<br>R: $\beta$ -naftil  | 21                  | 9 | 17             | 29 | 7.2    | 3.8 |
| 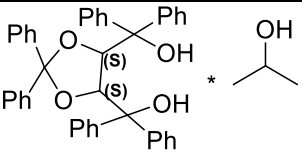                      | 21                  | 9 | 13             | 30 | 4.6    | 2.9 |
| 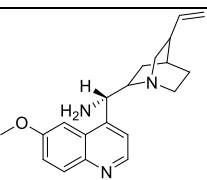                      | 8                   | 8 | 10             | 11 | 2.9    | 1.9 |
| 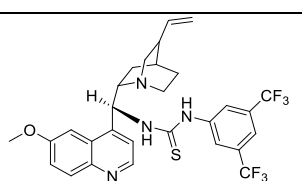                      | 8                   | 8 | 9              | 8  | 0.0    | 1.0 |

**Table S1.** Organocatalytic transformations of **1a** to *trans*-**10a** (columns A) and **1a** to **11a** (columns B); reaction condition: MgSO<sub>4</sub>/CHCl<sub>3</sub>, 0.3 equivalent of organocatalyst, rt.

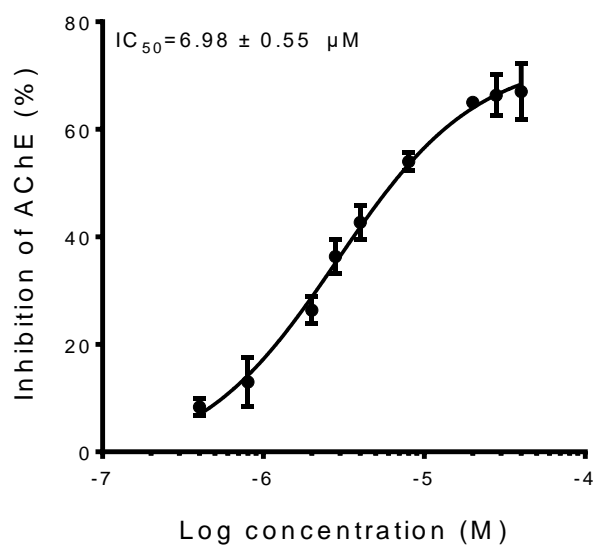

**Figure S78.** Concentration-dependent curve of **6** for the inhibition of AChE activity.  $IC_{50}$  of **6** was calculated to be  $6.98 \pm 0.55 \mu M$ . Every point is an average of three independent experiments (mean  $\pm$  SD).
